# Supplementary material for: Generation and application of carbodiimide anions: efficient construction of 2-aminopyrimidines via a cascade [4 + 2] annulation/aromatization sequence
Source: Royal Society of Chemistry journal article supplement (doi:10.1039/d3qo01604h), 2023-01-01
Supplement: d3qo01604h1.pdf [file d3qo01604h1.pdf]

## Supporting Information

### Generation and Application of Carbodiimide Anion: Efficient Construction for 2-aminopyrimidines via a Cascade [4+2] Annulation/Aromatization Sequence

Chuan-Chuan Wang,<sup>[a]</sup> Xin-Lu Wang,<sup>[b]</sup> Qing-Long Wang,<sup>[a]</sup> Yi-Zhi Gong,<sup>[c]</sup> Xue-Hui  
Hou,<sup>[a]</sup> Jun-Tao Liu<sup>[a]</sup> and Ya-Jing Chen<sup>\*,[b]</sup>

<sup>a</sup> Faculty of Science, Henan University of Animal Husbandry and Economy, No. 146,  
Yingcai Street, Zhengzhou 450046, Henan, China.

<sup>b</sup> School of Pharmaceutical Sciences, Zhengzhou University, No. 100, Science Avenue,  
Zhengzhou 450001, Henan, China.

<sup>c</sup> China-ASEAN College of Marine Sciences, Xiamen University, No. 4221, Xiang'an  
South Road, Xiamen 361102, Fujian, China.

#### Table of Contents

|                                                                             |            |
|-----------------------------------------------------------------------------|------------|
| <b>1. General Information.....</b>                                          | <b>S2</b>  |
| <b>2. General procedures and characterization data of the products.....</b> | <b>S2</b>  |
| <b>3. Computational Details.....</b>                                        | <b>S18</b> |
| <b>4. References.....</b>                                                   | <b>S30</b> |
| <b>5. Copies of NMR Spectra.....</b>                                        | <b>S32</b> |
| <b>6. Single-Crystal X-Ray Diffraction Data.....</b>                        | <b>S72</b> |

## 1. General Information

All reactions were performed in oven-dried glassware with magnetic stirring. Unless otherwise stated, all reagents were purchased from commercial suppliers and used without further purification. All solvents were purified and dried according to standard methods prior to use. Organic solutions were concentrated under reduced pressure on a rotary evaporator or an oil pump. NMR spectra were recorded on a Bruker AM400 (400 MHz) spectrometer or Agilent DD2 (600 MHz) spectrometer. Chemical shifts are reported in  $\delta$  ppm referenced to an internal SiMe<sub>4</sub> ( $\delta$  0.00) standard for <sup>1</sup>H NMR and chloroform-*d* ( $\delta$  77.16) or DMSO-*d*<sub>6</sub> ( $\delta$  39.52) for <sup>13</sup>C NMR. Data for <sup>1</sup>H NMR are recorded as follows: chemical shift ( $\delta$  ppm), multiplicity (s, singlet; d, doublet; t, triplet; q, quartet; m, multiplet), coupling constant (Hz) and integration. Data for <sup>13</sup>C NMR and <sup>19</sup>F NMR are reported in terms of chemical shift ( $\delta$ , ppm). High-resolution mass spectra (HRMS) were recorded on a Thermo Q-Exactive Spectrometer (ESI source). Reactions were monitored through thin layer chromatography (TLC) on silica gel-precoated glass plates. Flash column chromatography was performed using silica gel (300-400 mesh). CCDC-2282332 (**3ea**), CCDC-2282334 (*trans*-**5as**), contain the supplementary crystallographic data for this paper. These data can be obtained free of charge from the Cambridge Crystallographic Data Centre via [www.ccdc.cam.ac.uk/data\\_request/cif](http://www.ccdc.cam.ac.uk/data_request/cif).

N-Ts Cyanamides **1**<sup>1</sup> and 1-azadienes **2**<sup>2</sup> were synthesized employing literature procedures.

## 2. General Procedures and Characterization Data of the Products

### 2.1 General Procedures for the Reaction Between N-Ts Cyanamides **1** and 1-Azadienes **2**

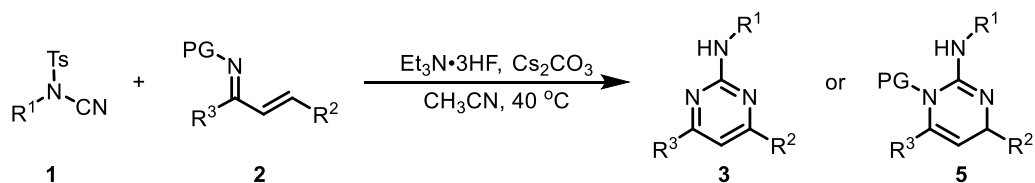

In a 10 mL test tube was sequentially added N-Ts cyanamides **1** (0.30 mmol, 1.5 equiv.), linear 1-azadienes **2** (0.20 mmol, 1.0 equiv.), Cs<sub>2</sub>CO<sub>3</sub> (0.20 mmol, 1.0 equiv.),

Et<sub>3</sub>N·3HF (0.133 mmol, 0.67 equiv.) and MeCN (2.0 mL) under air atmosphere. The tube was sealed and stirred at 40 °C. After the complete consumption of linear 1-azadienes **2**, the reaction mixture was concentrated under reduced pressure and the resulting residue was purified by flash column chromatography (ethyl acetate/hexane) on silica gel to afford the pure products **3** or **5**. Compounds **3aa**<sup>3</sup>, **3ba**<sup>4</sup>, **3ca**<sup>5</sup> and **3af**<sup>6</sup> are known.

### 2.3 Characterization Data of Products

#### N,4,6-triphenylpyrimidin-2-amine (**3aa**)

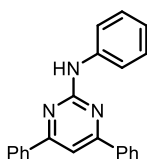

White solid (63 mg, 98% yield), purified by ethyl acetate:hexane = 1:40. m. p. 129-130 °C. <sup>1</sup>H NMR (400 MHz, CDCl<sub>3</sub>) δ 8.13-8.10 (m, 4H), 7.76 (d, *J* = 7.6 Hz, 2H), 7.56 (s, 1H), 7.53-7.49 (m, 6H), 7.40-7.34 (m, 3H), 7.04 (d, *J* = 7.6 Hz, 1H) ppm; <sup>13</sup>C NMR (100 MHz, CDCl<sub>3</sub>) δ 165.9, 160.6, 140.1, 137.7, 130.8, 129.00, 128.95, 127.3, 122.2, 119.1, 104.8 ppm; IR (KBr): ν 3420, 3406, 2832, 1596, 1575, 1532, 1497, 1459, 1433, 1351, 1312, 1211, 1177, 1070, 1028, 988, 925, 760, 690, 604 cm<sup>-1</sup>; HRMS (ESI) *m/z*: [M + H]<sup>+</sup> Calcd. for C<sub>22</sub>H<sub>18</sub>N<sub>3</sub> 324.1495, Found 324.1502.

#### N-(4-methoxyphenyl)-4,6-diphenylpyrimidin-2-amine (**3ba**)

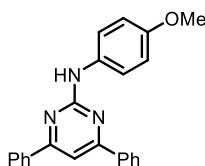

Yellow solid (58 mg, 82% yield), purified by ethyl acetate:hexane = 1:30. m. p. 117-119 °C. <sup>1</sup>H NMR (600 MHz, CDCl<sub>3</sub>) δ 8.12-8.10 (m, 4H), 7.66 (d, *J* = 9.0 Hz, 2H), 7.54 (s, 1H), 7.52-7.48 (m, 6H), 7.24-7.23 (m, 1H), 6.93 (d, *J* = 9.0 Hz, 2H), 3.82 (s, 3H) ppm; <sup>13</sup>C NMR (151 MHz, CDCl<sub>3</sub>) δ 165.9, 160.8, 155.3, 137.9, 133.4, 130.7, 128.9, 127.3, 121.1, 114.3, 104.4, 55.7 ppm; IR (KBr): ν 3421, 1589, 1572, 1533, 1507, 1458, 1440, 1415, 1354, 1244, 1181, 833, 759, 687, 576 cm<sup>-1</sup>; HRMS (ESI) *m/z*: [M + H]<sup>+</sup> Calcd. for C<sub>23</sub>H<sub>20</sub>N<sub>3</sub>O 354.1601, Found 354.1610.

#### 4,6-diphenyl-N-(p-tolyl)pyrimidin-2-amine (**3ca**)

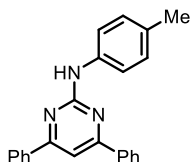

Yellow solid (56 mg, 83% yield), purified by ethyl acetate:hexane = 1:40. m. p. 136-138 °C. <sup>1</sup>H NMR (400 MHz, CDCl<sub>3</sub>) δ 8.14-8.11 (m, 4H), 7.66 (d, *J* = 8.4 Hz, 2H), 7.56 (s, 1H), 7.54-7.50 (m, 6H), 7.29 (s, 1H), 7.18 (d, *J* = 8.4 Hz, 2H), 2.35 (s, 3H) ppm; <sup>13</sup>C NMR (100 MHz, CDCl<sub>3</sub>) δ 165.9, 160.7, 137.8, 137.5, 131.8, 130.7, 129.5, 129.0, 127.3, 119.4, 104.6, 20.9 ppm; IR (KBr): ν 3403, 2098, 1590, 1574, 1530, 1493, 1455, 1440, 1408, 1351, 1244, 1207, 1083, 1029, 988, 814, 760, 685, 583 cm<sup>-1</sup>; HRMS (ESI) m/z: [M + H]<sup>+</sup> Calcd. for C<sub>23</sub>H<sub>20</sub>N<sub>3</sub> 338.1652, Found 338.1660.

**N-(4-fluorophenyl)-4,6-diphenylpyrimidin-2-amine (3da)**

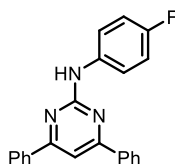

White solid (67 mg, 98% yield), purified by ethyl acetate:hexane = 1:30. m. p. 140-141 °C. <sup>1</sup>H NMR (600 MHz, CDCl<sub>3</sub>) δ 8.12-8.10 (m, 4H), 7.71-7.68 (m, 2H), 7.58 (s, 1H), 7.53-7.49 (m, 6H), 7.35 (s, 1H), 7.06 (t, *J* = 8.4 Hz, 2H) ppm; <sup>13</sup>C NMR (151 MHz, CDCl<sub>3</sub>) δ 166.0, 160.6, 158.4 (d, *J* = 241.6 Hz), 137.7, 136.1 (d, *J* = 1.5 Hz), 130.8, 129.0, 127.3, 120.8 (d, *J* = 9.1 Hz), 115.5 (d, *J* = 22.7 Hz), 104.9 ppm; <sup>19</sup>F NMR (565 MHz, CDCl<sub>3</sub>) δ -121.1 ppm; IR (KBr): ν 3434, 1589, 1544, 1528, 1455, 1409, 1364, 1213, 1180, 1156, 832, 777, 760, 694, 535 cm<sup>-1</sup>; HRMS (ESI) m/z: [M + H]<sup>+</sup> Calcd. for C<sub>22</sub>H<sub>17</sub>FN<sub>3</sub> 342.1401, Found 342.1410.

**N-(4-chlorophenyl)-4,6-diphenylpyrimidin-2-amine (3ea)**

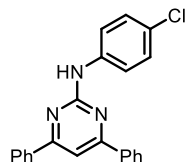

White solid (59 mg, 83% yield), purified by ethyl acetate:hexane = 1:40. m. p. 167-168 °C. <sup>1</sup>H NMR (600 MHz, CDCl<sub>3</sub>) δ 8.11-8.10 (m, 4H), 7.69 (d, *J* = 9.0 Hz, 2H), 7.59 (s, 1H), 7.53-7.50 (m, 6H), 7.39 (s, 1H), 7.30 (d, *J* = 9.0 Hz, 2H) ppm; <sup>13</sup>C NMR (151 MHz, CDCl<sub>3</sub>) δ 166.0, 160.4, 138.7, 137.6, 130.9, 129.0, 128.9, 127.3, 127.0, 120.3, 105.1 ppm; IR (KBr): ν 3446, 3259, 2830, 1607, 1536, 1491, 1455,

1405, 1356, 1247, 1089, 992, 826, 774, 759, 683  $\text{cm}^{-1}$ ; HRMS (ESI)  $m/z$ :  $[M + H]^+$   
Calcd. for  $\text{C}_{22}\text{H}_{17}\text{ClN}_3$  358.1106, Found 358.1112.

**N-(4-bromophenyl)-4,6-diphenylpyrimidin-2-amine (3fa)**

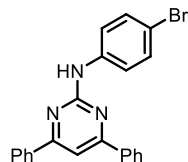

White solid (75 mg, 94% yield), purified by ethyl acetate:hexane = 1:40. m. p. 172-173  $^{\circ}\text{C}$ .  $^1\text{H}$  NMR (600 MHz,  $\text{CDCl}_3$ )  $\delta$  8.12-8.09 (m, 4H), 7.65 (d,  $J = 9.0$  Hz, 2H), 7.59 (s, 1H), 7.54-7.50 (m, 6H), 7.45 (d,  $J = 8.4$  Hz, 2H), 7.38 (s, 1H) ppm;  $^{13}\text{C}$  NMR (151 MHz,  $\text{CDCl}_3$ )  $\delta$  166.0, 160.3, 139.2, 137.6, 131.9, 130.9, 129.0, 127.3, 120.7, 114.4, 105.2 ppm; IR (KBr):  $\nu$  3181, 1610, 1534, 1489, 1456, 1438, 1402, 1355, 1248, 1090, 996, 830, 759, 683, 501  $\text{cm}^{-1}$ ; HRMS (ESI)  $m/z$ :  $[M + H]^+$  Calcd. for  $\text{C}_{22}\text{H}_{17}\text{Br}^{79}\text{N}_3$  402.0600, Found 402.0602.

**4,6-diphenyl-N-(4-(trifluoromethyl)phenyl)pyrimidin-2-amine (3ga)**

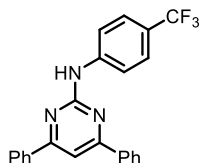

White solid (57 mg, 73% yield), purified by ethyl acetate:hexane = 1:40. m. p. 167-168  $^{\circ}\text{C}$ .  $^1\text{H}$  NMR (600 MHz,  $\text{CDCl}_3$ )  $\delta$  8.13-8.11 (m, 4H), 7.87 (d,  $J = 9.0$  Hz, 2H), 7.64 (s, 1H), 7.61-7.57 (m, 3H), 7.55-7.52 (m, 6H) ppm;  $^{13}\text{C}$  NMR (151 MHz,  $\text{CDCl}_3$ )  $\delta$  166.1, 160.1, 143.2, 137.4, 131.0, 129.1, 127.3, 126.3 (q,  $J = 3.0$  Hz), 124.7 (q,  $J = 270.0$  Hz), 123.7 (q,  $J = 33.2$  Hz), 118.3, 105.7 ppm;  $^{19}\text{F}$  NMR (565 MHz,  $\text{CDCl}_3$ )  $\delta$  -61.6 ppm; IR (KBr):  $\nu$  3396, 1619, 1598, 1577, 1527, 1412, 1355, 1325, 1113, 1067, 762  $\text{cm}^{-1}$ ; HRMS (ESI)  $m/z$ :  $[M + H]^+$  Calcd. for  $\text{C}_{23}\text{H}_{17}\text{F}_3\text{N}_3$  392.1369, Found 392.1378.

**methyl 4-((4,6-diphenylpyrimidin-2-yl)amino)benzoate (3ha)**

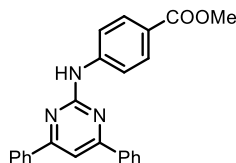

White solid (60 mg, 79% yield), purified by ethyl acetate:hexane = 1:20. m. p. 156-158  $^{\circ}\text{C}$ .  $^1\text{H}$  NMR (600 MHz,  $\text{CDCl}_3$ )  $\delta$  8.13-8.12 (m, 4H), 8.05 (d,  $J = 8.4$  Hz,

2H), 7.85 (d,  $J = 9.0$  Hz, 2H), 7.66-7.62 (m, 2H), 7.53-7.52 (m, 6H), 3.90 (s, 3H) ppm;  $^{13}\text{C}$  NMR (151 MHz,  $\text{CDCl}_3$ )  $\delta$  167.1, 166.0, 160.0, 144.5, 137.4, 131.0, 129.6, 129.1, 127.3, 123.2, 117.8, 105.6, 52.0 ppm; IR (KBr):  $\nu$  3434, 3329, 2959, 2831, 2716, 1703, 1599, 1526, 1493, 1412, 1365, 1285, 1267, 1174, 1113, 989, 855, 775, 763, 690, 630  $\text{cm}^{-1}$ ; HRMS (ESI)  $m/z$ :  $[\text{M} + \text{H}]^+$  Calcd. for  $\text{C}_{24}\text{H}_{20}\text{N}_3\text{O}_2$  382.1550, Found 382.1558.

#### 4,6-diphenyl-N-(*m*-tolyl)pyrimidin-2-amine (3ia)

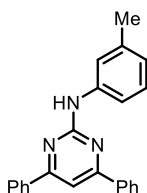

White solid (65 mg, 96% yield), purified by ethyl acetate:hexane = 1:40. m. p. 102-104 °C.  $^1\text{H}$  NMR (600 MHz,  $\text{CDCl}_3$ )  $\delta$  8.14-8.13 (m, 4H), 7.64 (d,  $J = 7.8$  Hz, 1H), 7.58 (s, 2H), 7.53-7.49 (m, 6H), 7.34 (s, 1H), 7.26 (t,  $J = 7.8$  Hz, 1H), 6.87 (d,  $J = 7.8$  Hz, 1H), 2.39 (s, 3H) ppm;  $^{13}\text{C}$  NMR (151 MHz,  $\text{CDCl}_3$ )  $\delta$  165.9, 160.6, 140.0, 138.7, 137.8, 130.8, 129.0, 128.9, 127.3, 123.1, 119.9, 116.3, 104.7, 21.8 ppm; IR (KBr):  $\nu$  3384, 1598, 1587, 1572, 1533, 1497, 1444, 1362, 1347, 1096, 996, 830, 761, 688  $\text{cm}^{-1}$ ; HRMS (ESI)  $m/z$ :  $[\text{M} + \text{H}]^+$  Calcd. for  $\text{C}_{23}\text{H}_{20}\text{N}_3$  338.1652, Found 338.1661.

#### N-(3-chlorophenyl)-4,6-diphenylpyrimidin-2-amine (3ja)

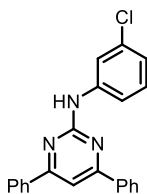

White solid (65 mg, 91% yield), purified by ethyl acetate:hexane = 1:40. m. p. 141-142 °C.  $^1\text{H}$  NMR (400 MHz,  $\text{CDCl}_3$ )  $\delta$  8.14-8.12 (m, 4H), 8.04 (t,  $J = 2.0$  Hz, 1H), 7.62 (s, 2H), 7.56-7.50 (m, 7H), 7.27 (t,  $J = 8.0$  Hz, 1H), 7.03-7.01 (m, 1H) ppm;  $^{13}\text{C}$  NMR (100 MHz,  $\text{CDCl}_3$ )  $\delta$  165.9, 159.9, 141.1, 137.2, 134.7, 131.1, 129.9, 129.1, 127.4, 122.2, 119.2, 117.1, 105.2 ppm; IR (KBr):  $\nu$  3421, 3398, 3123, 2955, 2925, 1599, 1571, 1524, 1495, 1457, 1443, 1426, 1363, 1076, 761, 688, 627, 562  $\text{cm}^{-1}$ ; HRMS (ESI)  $m/z$ :  $[\text{M} + \text{H}]^+$  Calcd. for  $\text{C}_{22}\text{H}_{17}\text{ClN}_3$  358.1106, Found 358.1115.

### N-(3-nitrophenyl)-4,6-diphenylpyrimidin-2-amine (3ka)

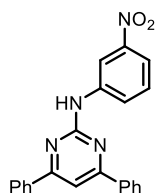

Yellow solid (73 mg, 99% yield), purified by ethyl acetate:hexane = 1:40. m. p. 137-138 °C. <sup>1</sup>H NMR (600 MHz, CDCl<sub>3</sub>) δ 9.20 (s, 1H), 8.17-8.15 (m, 4H), 7.85-7.83 (m, 1H), 7.80 (s, 1H), 7.67-7.65 (m, 2H), 7.55-7.51 (m, 6H), 7.41 (t, *J* = 8.4 Hz, 1H) ppm; <sup>13</sup>C NMR (151 MHz, CDCl<sub>3</sub>) δ 166.1, 160.0, 148.9, 141.3, 137.1, 131.2, 129.4, 129.1, 127.4, 124.0, 116.5, 113.6, 105.7 ppm; IR (KBr): ν 3334, 1602, 1574, 1533, 1518, 1430, 1365, 1348, 1096, 996, 830, 761, 688 cm<sup>-1</sup>; HRMS (ESI) *m/z*: [M + H]<sup>+</sup> Calcd. for C<sub>22</sub>H<sub>17</sub>N<sub>4</sub>O<sub>2</sub> 369.1346, Found 369.1349.

### 4,6-diphenyl-N-(*o*-tolyl)pyrimidin-2-amine (3la)

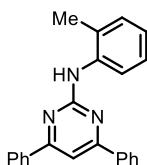

White solid (55 mg, 82% yield), purified by ethyl acetate:hexane = 1:40. m. p. 102-103 °C. <sup>1</sup>H NMR (600 MHz, CDCl<sub>3</sub>) δ 8.36 (d, *J* = 7.8 Hz, 1H), 8.12-8.11 (m, 4H), 7.56 (s, 1H), 7.52-7.48 (m, 6H), 7.31 (t, *J* = 7.8 Hz, 1H), 7.23-7.22 (m, 1H), 7.06-7.02 (m, 2H), 2.39 (s, 3H) ppm; <sup>13</sup>C NMR (151 MHz, CDCl<sub>3</sub>) δ 165.9, 161.0, 138.1, 137.8, 130.7, 130.5, 128.9, 127.7, 127.3, 126.7, 123.0, 121.1, 104.7, 18.4 ppm; IR (KBr): ν 3443, 2831, 1602, 1528, 1496, 1480, 1464, 1445, 1402, 1366, 1350, 1311, 1180, 775, 753, 688, 628, 556 cm<sup>-1</sup>; HRMS (ESI) *m/z*: [M + H]<sup>+</sup> Calcd. for C<sub>23</sub>H<sub>20</sub>N<sub>3</sub> 338.1652, Found 338.1663.

### N-(2-fluorophenyl)-4,6-diphenylpyrimidin-2-amine (3ma)

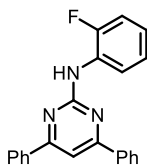

White solid (68 mg, 99% yield), purified by ethyl acetate:hexane = 1:45. m. p. 125-126 °C. <sup>1</sup>H NMR (600 MHz, CDCl<sub>3</sub>) δ 8.76 (t, *J* = 8.4 Hz, 1H), 8.14-8.12 (m, 4H), 7.61 (s, 1H), 7.54-7.50 (m, 7H), 7.21 (t, *J* = 7.8 Hz, 1H), 7.14-7.11 (m, 1H),

6.99-6.95 (m, 1H) ppm;  $^{13}\text{C}$  NMR (151 MHz,  $\text{CDCl}_3$ )  $\delta$  166.0, 160.3, 152.5 (d,  $J = 241.6$  Hz), 137.6, 130.9, 129.0, 128.7 (d,  $J = 9.1$  Hz), 127.3, 124.4 (d,  $J = 3.0$  Hz), 121.9 (d,  $J = 7.6$  Hz), 120.5, 114.8 (d,  $J = 19.6$  Hz), 105.3 ppm;  $^{19}\text{F}$  NMR (565 MHz,  $\text{CDCl}_3$ )  $\delta$  -131.8 ppm; IR (KBr):  $\nu$  3443, 1621, 1594, 1573, 1528, 1477, 1450, 1425, 1353, 1181, 780, 750, 688  $\text{cm}^{-1}$ ; HRMS (ESI)  $m/z$ :  $[\text{M} + \text{H}]^+$  Calcd. for  $\text{C}_{22}\text{H}_{17}\text{FN}_3$  342.1401, Found 342.1410.

**N-(2,4-dimethylphenyl)-4,6-diphenylpyrimidin-2-amine (3na)**

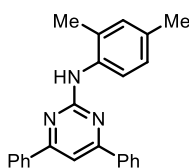

Yellow solid (48 mg, 68% yield), purified by ethyl acetate:hexane = 1:40. m. p. 116-117  $^{\circ}\text{C}$ .  $^1\text{H}$  NMR (600 MHz,  $\text{CDCl}_3$ )  $\delta$  8.14-8.10 (m, 5H), 7.55 (s, 1H), 7.52-7.47 (m, 6H), 7.11 (d,  $J = 7.8$  Hz, 1H), 7.05 (s, 1H), 6.97 (s, 1H), 2.36 (s, 3H), 2.34 (s, 3H) ppm;  $^{13}\text{C}$  NMR (151 MHz,  $\text{CDCl}_3$ )  $\delta$  165.9, 161.2, 137.9, 135.5, 132.7, 131.2, 130.7, 128.9, 128.3, 127.3, 127.1, 121.7, 104.4, 21.0, 18.3 ppm; IR (KBr):  $\nu$  3435, 1589, 1525, 1496, 1446, 1385, 1351, 1310, 1231, 1205, 1084, 988, 844, 758, 694, 627, 533  $\text{cm}^{-1}$ ; HRMS (ESI)  $m/z$ :  $[\text{M} + \text{H}]^+$  Calcd. for  $\text{C}_{24}\text{H}_{22}\text{N}_3$  352.1808, Found 352.1816.

**N-(naphthalen-2-yl)-4,6-diphenylpyrimidin-2-amine (3oa)**

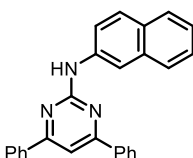

White solid (63 mg, 84% yield), purified by ethyl acetate:hexane = 1:40. m. p. 146-148  $^{\circ}\text{C}$ .  $^1\text{H}$  NMR (600 MHz,  $\text{CDCl}_3$ )  $\delta$  8.50 (d,  $J = 1.8$  Hz, 1H), 8.18-8.16 (m, 4H), 7.82-7.78 (m, 3H), 7.67 (dd,  $J = 9.0, 2.4$  Hz, 1H), 7.62 (s, 1H), 7.55-7.50 (m, 7H), 7.46 (t,  $J = 7.8$  Hz, 1H), 7.36 (t,  $J = 7.8$  Hz, 1H) ppm;  $^{13}\text{C}$  NMR (151 MHz,  $\text{CDCl}_3$ )  $\delta$  166.0, 160.6, 137.7, 137.6, 134.4, 130.8, 129.8, 129.0, 128.6, 127.7, 127.5, 127.4, 126.4, 124.2, 120.5, 114.8, 105.0 ppm; IR (KBr):  $\nu$  3401, 3130, 2831, 1605, 1590, 1528, 1491, 1471, 1456, 1399, 1357, 1251, 1084, 988, 854, 774, 759, 688, 569  $\text{cm}^{-1}$ ; HRMS (ESI)  $m/z$ :  $[\text{M} + \text{H}]^+$  Calcd. for  $\text{C}_{26}\text{H}_{20}\text{N}_3$  374.1652, Found 374.1663.

**4-(4-methoxyphenyl)-N,6-diphenylpyrimidin-2-amine (3ad)**



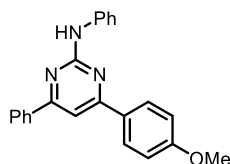

Yellow solid (49 mg, 69% yield), purified by ethyl acetate:hexane = 1:20. m. p. 146-147 °C. <sup>1</sup>H NMR (600 MHz, CDCl<sub>3</sub>) δ 8.12-8.10 (m, 4H), 7.78 (d, *J* = 7.8 Hz, 2H), 7.52-7.48 (m, 4H), 7.37 (t, *J* = 7.8 Hz, 2H), 7.32 (s, 1H), 7.05-7.01 (m, 3H), 3.87 (s, 3H) ppm; <sup>13</sup>C NMR (151 MHz, CDCl<sub>3</sub>) δ 165.7, 165.4, 161.9, 160.5, 140.2, 137.9, 130.6, 130.1, 129.0, 128.9, 128.8, 127.3, 122.2, 119.1, 114.3, 104.1, 55.5 ppm; IR (KBr): ν 3425, 3249, 3121, 1606, 1585, 1534, 1515, 1495, 1456, 1438, 1358, 1302, 1258, 1237, 1173, 1127, 1027, 990, 827, 772, 693, 582 cm<sup>-1</sup>; HRMS (ESI) m/z: [M + H]<sup>+</sup> Calcd. for C<sub>23</sub>H<sub>20</sub>N<sub>3</sub>O 354.1601, Found 354.1612.

#### N,4-diphenyl-6-(p-tolyl)pyrimidin-2-amine (3ae)

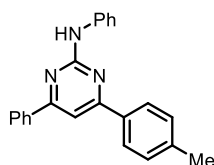

White solid (53 mg, 79% yield), purified by ethyl acetate:hexane = 1:40. m. p. 119-120 °C. <sup>1</sup>H NMR (600 MHz, CDCl<sub>3</sub>) δ 8.13-8.12 (m, 2H), 8.04 (d, *J* = 8.4 Hz, 2H), 7.79 (d, *J* = 7.8 Hz, 2H), 7.56 (s, 1H), 7.53-7.49 (m, 3H), 7.38-7.31 (m, 5H), 7.04 (t, *J* = 8.4 Hz, 1H), 2.43 (s, 3H) ppm; <sup>13</sup>C NMR (151 MHz, CDCl<sub>3</sub>) δ 165.9, 165.8, 160.6, 141.1, 140.2, 137.9, 135.0, 130.7, 129.7, 129.0, 128.9, 127.3, 127.2, 122.2, 119.1, 104.6, 21.6 ppm; IR (KBr): ν 3415, 2832, 2717, 1715, 1597, 1536, 1497, 1434, 1364, 1222, 1084, 819, 775, 691, 531 cm<sup>-1</sup>; HRMS (ESI) m/z: [M + H]<sup>+</sup> Calcd. for C<sub>23</sub>H<sub>20</sub>N<sub>3</sub> 338.1652, Found 338.1660.

#### 4-(4-fluorophenyl)-N,6-diphenylpyrimidin-2-amine (3af)

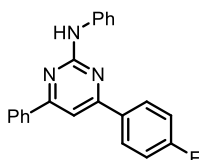

White solid (64 mg, 94% yield), purified by ethyl acetate:hexane = 1:40. m. p. 121-123 °C. <sup>1</sup>H NMR (600 MHz, CDCl<sub>3</sub>) δ 8.14-8.11 (m, 4H), 7.77 (d, *J* = 8.4 Hz, 2H), 7.53-7.51 (m, 4H), 7.38 (t, *J* = 7.8 Hz, 2H), 7.32 (d, *J* = 5.4 Hz, 1H), 7.19 (t, *J* = 8.4 Hz, 2H), 7.06 (t, *J* = 7.2 Hz, 1H) ppm; <sup>13</sup>C NMR (151 MHz, CDCl<sub>3</sub>) δ 166.1,

164.8, 164.6 (d,  $J = 250.7$  Hz), 160.6, 140.0, 137.7, 133.9 (d,  $J = 3.0$  Hz), 130.9, 129.3 (d,  $J = 9.1$  Hz), 129.1, 129.0, 127.3, 122.4, 119.2, 116.0 (d,  $J = 21.1$  Hz), 104.5 ppm;  $^{19}\text{F}$  NMR (565 MHz,  $\text{CDCl}_3$ )  $\delta$  -110.0 ppm; IR (KBr):  $\nu$  3423, 2831, 1604, 1543, 1509, 1496, 1447, 1435, 1354, 1312, 1220, 1178, 1155, 1072, 1030, 1014, 990, 898, 831, 772, 760, 693, 570  $\text{cm}^{-1}$ ; HRMS (ESI)  $m/z$ :  $[\text{M} + \text{H}]^+$  Calcd. for  $\text{C}_{22}\text{H}_{17}\text{FN}_3$  342.1401, Found 342.1413.

#### 4-(4-chlorophenyl)-N,6-diphenylpyrimidin-2-amine (3ag)

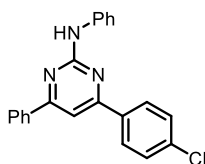

White solid (59 mg, 83% yield), purified by ethyl acetate:hexane = 1:40. m. p. 150-152  $^{\circ}\text{C}$ .  $^1\text{H}$  NMR (600 MHz,  $\text{CDCl}_3$ )  $\delta$  8.12-8.09 (m, 2H), 8.06 (d,  $J = 8.4$  Hz, 2H), 7.75 (d,  $J = 8.4$  Hz, 2H), 7.53-7.50 (m, 4H), 7.47 (d,  $J = 8.4$  Hz, 2H), 7.37 (t,  $J = 8.4$  Hz, 2H), 7.32 (s, 1H), 7.06 (t,  $J = 7.8$  Hz, 1H) ppm;  $^{13}\text{C}$  NMR (151 MHz,  $\text{CDCl}_3$ )  $\delta$  166.2, 164.6, 160.6, 140.0, 137.6, 136.9, 136.2, 130.9, 129.2, 129.1, 129.0, 128.6, 127.3, 122.4, 119.2, 104.5 ppm; IR (KBr):  $\nu$  3412, 3061, 2832, 1714, 1593, 1541, 1528, 1492, 1457, 1442, 1428, 1366, 1351, 1304, 1247, 1207, 1085, 1015, 989, 851, 827, 770, 759, 699, 690, 654, 560  $\text{cm}^{-1}$ ; HRMS (ESI)  $m/z$ :  $[\text{M} + \text{H}]^+$  Calcd. for  $\text{C}_{22}\text{H}_{17}\text{ClN}_3$  358.1106, Found 358.1114.

#### 4-(4-bromophenyl)-N,6-diphenylpyrimidin-2-amine (3ah)

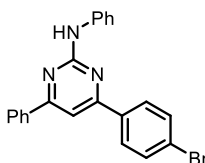

White solid (79 mg, 99% yield), purified by ethyl acetate:hexane = 1:40. m. p. 138-140  $^{\circ}\text{C}$ .  $^1\text{H}$  NMR (600 MHz,  $\text{CDCl}_3$ )  $\delta$  8.12-8.10 (m, 2H), 7.99 (d,  $J = 8.4$  Hz, 2H), 7.76 (d,  $J = 7.2$  Hz, 2H), 7.64 (d,  $J = 9.0$  Hz, 2H), 7.53-7.51 (m, 4H), 7.38 (t,  $J = 7.8$  Hz, 2H), 7.31 (s, 1H), 7.06 (t,  $J = 7.2$  Hz, 1H) ppm;  $^{13}\text{C}$  NMR (151 MHz,  $\text{CDCl}_3$ )  $\delta$  166.2, 164.7, 160.6, 140.0, 137.6, 136.6, 132.2, 130.9, 129.1, 129.0, 128.8, 127.3, 125.3, 122.4, 119.2, 104.5 ppm; IR (KBr):  $\nu$  3407, 3061, 2832, 1592, 1540, 1527, 1493, 1456, 1442, 1398, 1365, 1348, 1305, 1247, 1180, 1068, 1010, 988, 895, 824,

769, 728, 691, 561  $\text{cm}^{-1}$ ; HRMS (ESI)  $m/z$ :  $[M + H]^+$  Calcd. for  $\text{C}_{22}\text{H}_{17}\text{Br}^{79}\text{N}_3$  402.0600, Found 402.0607.

#### 4-(4-nitrophenyl)-N,6-diphenylpyrimidin-2-amine (3ai)

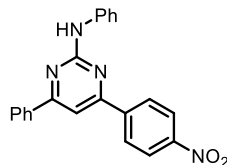

White solid (51 mg, 69% yield), purified by ethyl acetate:hexane = 1:9. m. p. 150-151  $^{\circ}\text{C}$ .  $^1\text{H}$  NMR (600 MHz,  $\text{CDCl}_3$ )  $\delta$  8.36 (d,  $J = 8.4$  Hz, 2H), 8.28 (d,  $J = 9.0$  Hz, 2H), 8.14-8.13 (m, 2H), 7.76 (d,  $J = 7.8$  Hz, 2H), 7.61 (s, 1H), 7.55-7.54 (m, 3H), 7.40 (t,  $J = 7.8$  Hz, 2H), 7.36 (s, 1H), 7.09 (t,  $J = 7.8$  Hz, 1H) ppm;  $^{13}\text{C}$  NMR (151 MHz,  $\text{CDCl}_3$ )  $\delta$  166.8, 163.4, 160.7, 149.3, 143.7, 139.7, 137.3, 131.2, 129.2, 129.1, 128.2, 127.4, 124.2, 122.8, 119.4, 105.3 ppm; IR (KBr):  $\nu$  3051, 2831, 1592, 1541, 1527, 1494, 1456, 1306, 1247, 1180, 1068, 1010, 988, 895, 824, 769, 728, 691, 561  $\text{cm}^{-1}$ ; HRMS (ESI)  $m/z$ :  $[M + H]^+$  Calcd. for  $\text{C}_{22}\text{H}_{17}\text{N}_4\text{O}_2$  369.1346, Found 369.1354.

#### 4-(6-phenyl-2-(phenylamino)pyrimidin-4-yl)benzonitrile (3aj)

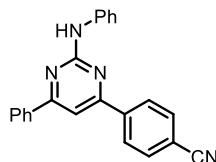

White solid (54 mg, 67% yield), purified by ethyl acetate:hexane = 1:7. m. p. 165-166  $^{\circ}\text{C}$ .  $^1\text{H}$  NMR (600 MHz,  $\text{CDCl}_3$ )  $\delta$  8.22 (d,  $J = 8.4$  Hz, 2H), 8.13-8.12 (m, 2H), 7.80 (d,  $J = 8.4$  Hz, 2H), 7.75 (d,  $J = 8.4$  Hz, 2H), 8.78 (s, 1H), 7.54-7.53 (m, 3H), 7.39 (t,  $J = 7.8$  Hz, 2H), 7.34 (s, 1H), 7.09 (t,  $J = 7.8$  Hz, 1H) ppm;  $^{13}\text{C}$  NMR (151 MHz,  $\text{CDCl}_3$ )  $\delta$  166.7, 163.8, 160.7, 142.0, 139.7, 137.3, 132.8, 131.2, 129.13, 129.10, 127.9, 127.4, 122.8, 119.4, 118.7, 114.1, 105.1 ppm; IR (KBr):  $\nu$  3400, 3062, 2831, 1592, 1540, 1527, 1493, 1456, 1442, 1398, 1365, 1348, 1010, 988, 895, 824, 769, 728, 691, 561  $\text{cm}^{-1}$ ; HRMS (ESI)  $m/z$ :  $[M + H]^+$  Calcd. for  $\text{C}_{23}\text{H}_{17}\text{N}_4$  349.1448, Found 349.1450.

#### N,4-diphenyl-6-(m-tolyl)pyrimidin-2-amine (3ak)

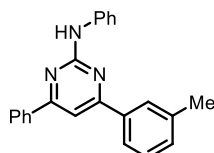

White solid (60 mg, 89% yield), purified by ethyl acetate:hexane = 1:40. m. p. 140-141 °C. <sup>1</sup>H NMR (600 MHz, CDCl<sub>3</sub>) δ 8.14-8.13 (m, 2H), 7.93-7.91 (m, 2H), 7.79 (d, *J* = 7.8 Hz, 2H), 7.57 (s, 1H), 7.53-7.48 (m, 3H), 7.41-7.31 (m, 5H), 7.05 (t, *J* = 7.2 Hz, 1H), 2.46 (s, 3H) ppm; <sup>13</sup>C NMR (151 MHz, CDCl<sub>3</sub>) δ 166.2, 165.8, 160.6, 140.2, 138.6, 137.8, 137.7, 131.5, 130.7, 129.02, 128.95, 128.88, 127.9, 127.3, 124.5, 122.2, 119.1, 104.9, 21.7 ppm; IR (KBr): ν 3441, 3247, 2832, 1599, 1538, 1496, 1465, 1446, 1356, 1250, 1200, 1084, 835, 767, 723, 696, 657, 631 cm<sup>-1</sup>; HRMS (ESI) m/z: [M + H]<sup>+</sup> Calcd. for C<sub>23</sub>H<sub>20</sub>N<sub>3</sub> 338.1652, Found 338.1660.

#### 4-(3-fluorophenyl)-N,6-diphenylpyrimidin-2-amine (3al)

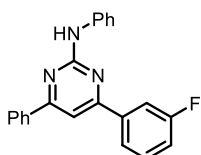

White solid (62 mg, 91% yield), purified by ethyl acetate:hexane = 1:40. m. p. 126-128 °C. <sup>1</sup>H NMR (600 MHz, CDCl<sub>3</sub>) δ 8.13-8.11 (m, 2H), 7.89 (d, *J* = 7.8 Hz, 1H), 7.86-7.84 (m, 1H), 7.76 (d, *J* = 7.8 Hz, 2H), 7.54-7.51 (m, 4H), 7.49-7.45 (m, 1H), 7.38 (t, *J* = 7.8 Hz, 2H), 7.33 (s, 1H), 7.21-7.18 (m, 1H), 7.06 (t, *J* = 7.2 Hz, 1H) ppm; <sup>13</sup>C NMR (151 MHz, CDCl<sub>3</sub>) δ 166.3, 164.5 (d, *J* = 1.5 Hz), 163.4 (d, *J* = 247.6 Hz), 160.6, 140.1 (d, *J* = 7.6 Hz), 139.9, 137.5, 130.9, 130.5 (d, *J* = 7.6 Hz), 129.1, 129.0, 127.3, 122.9 (d, *J* = 1.5 Hz), 122.5, 119.2, 117.6 (d, *J* = 21.1 Hz), 114.3 (d, *J* = 22.7 Hz), 104.8 ppm; <sup>19</sup>F NMR (565 MHz, CDCl<sub>3</sub>) δ -112.3 ppm; IR (KBr): ν 3395, 2832, 1593, 1575, 1550, 1497, 1461, 1445, 1432, 1354, 1307, 1269, 1252, 1211, 1193, 1158, 1031, 976, 898, 872, 778, 769, 754, 672, 630, 580 cm<sup>-1</sup>; HRMS (ESI) m/z: [M + H]<sup>+</sup> Calcd. for C<sub>22</sub>H<sub>17</sub>FN<sub>3</sub> 342.1401, Found 342.1410.

#### 4-(3-chlorophenyl)-N,6-diphenylpyrimidin-2-amine (3am)

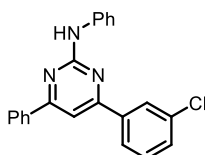

White solid (71 mg, 99% yield), purified by ethyl acetate:hexane = 1:40. m. p. 134-135 °C. <sup>1</sup>H NMR (400 MHz, CDCl<sub>3</sub>) δ 8.14-8.12 (m, 3H), 8.00 (d, *J* = 7.2 Hz, 1H), 7.77 (d, *J* = 8.0 Hz, 2H), 7.54-7.51 (m, 4H), 7.49-7.34 (m, 5H), 7.07 (t, *J* = 7.2

Hz, 1H) ppm;  $^{13}\text{C}$  NMR (100 MHz,  $\text{CDCl}_3$ )  $\delta$  166.3, 164.5, 160.5, 139.9, 139.5, 137.5, 135.1, 131.0, 130.7, 130.2, 129.1, 129.0, 127.5, 127.4, 125.4, 122.5, 119.3, 104.8 ppm; IR (KBr):  $\nu$  3390, 2831, 1598, 1547, 1497, 1457, 1444, 1433, 1363, 1352, 1302, 1268, 1294, 1185, 1119, 1068, 1031, 997, 895, 836, 799, 770, 757, 737, 672, 656, 585  $\text{cm}^{-1}$ ; HRMS (ESI)  $m/z$ :  $[\text{M} + \text{H}]^+$  Calcd. for  $\text{C}_{22}\text{H}_{17}\text{ClN}_3$  358.1106, Found 358.1112.

#### 4-(benzo[d][1,3]dioxol-5-yl)-N,6-diphenylpyrimidin-2-amine (3an)

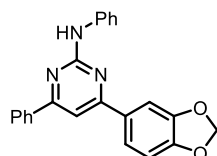

White solid (59 mg, 80% yield), purified by ethyl acetate:hexane = 1:3. m. p. 118-119  $^{\circ}\text{C}$ .  $^1\text{H}$  NMR (600 MHz,  $\text{CDCl}_3$ )  $\delta$  8.11-8.10 (m, 2H), 7.76 (d,  $J = 7.8$  Hz, 2H), 7.68-7.65 (m, 2H), 7.52-7.47 (m, 4H), 7.37 (t,  $J = 7.8$  Hz, 2H), 7.32 (s, 1H), 7.05 (t,  $J = 7.2$  Hz, 1H), 6.92 (d,  $J = 8.4$  Hz, 1H), 6.04 (s, 2H) ppm;  $^{13}\text{C}$  NMR (151 MHz,  $\text{CDCl}_3$ )  $\delta$  165.8, 165.2, 160.4, 150.0, 148.4, 140.1, 137.8, 132.0, 130.7, 129.0, 128.9, 127.3, 122.2, 121.9, 119.1, 108.6, 107.5, 104.2, 101.7 ppm; IR (KBr):  $\nu$  3433, 2832, 2717, 1599, 1537, 1496, 1446, 1433, 1364, 1249, 1084, 1036, 933, 774, 697  $\text{cm}^{-1}$ ; HRMS (ESI)  $m/z$ :  $[\text{M} + \text{H}]^+$  Calcd. for  $\text{C}_{23}\text{H}_{18}\text{N}_3\text{O}_2$  368.1394, Found 368.1401.

#### 4-(naphthalen-2-yl)-N,6-diphenylpyrimidin-2-amine (3ao)

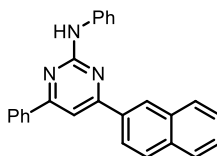

Yellow solid (46 mg, 62% yield), purified by ethyl acetate:hexane = 1:40. m. p. 131-133  $^{\circ}\text{C}$ .  $^1\text{H}$  NMR (600 MHz,  $\text{CDCl}_3$ )  $\delta$  8.62 (s, 1H), 8.22 (d,  $J = 8.4$  Hz, 1H), 8.16 (d,  $J = 6.0$  Hz, 2H), 7.98-7.96 (m, 2H), 7.89-7.88 (m, 1H), 7.82 (d,  $J = 8.4$  Hz, 2H), 7.71 (s, 1H), 7.55-7.52 (m, 5H), 7.41-7.38 (m, 3H), 7.07 (t,  $J = 7.2$  Hz, 1H) ppm;  $^{13}\text{C}$  NMR (151 MHz,  $\text{CDCl}_3$ )  $\delta$  166.0, 165.9, 160.7, 140.2, 137.9, 135.1, 134.7, 133.4, 130.8, 129.14, 129.07, 129.0, 128.7, 127.9, 127.5, 127.4 (3C), 126.7, 124.4, 122.3, 119.2, 105.1 ppm; IR (KBr):  $\nu$  3404, 3055, 2832, 1660, 1593, 1571, 1532, 1495, 1470, 1455, 1435, 1385, 1364, 1326, 1245, 1212, 1193, 1134, 1074, 1014, 991, 965, 899, 867, 815, 774, 756, 718, 695, 669, 645  $\text{cm}^{-1}$ ; HRMS (ESI)  $m/z$ :  $[\text{M} + \text{H}]^+$  Calcd. for

C<sub>26</sub>H<sub>20</sub>N<sub>3</sub> 374.1652, Found 374.1663.

**N,4-diphenyl-6-(thiophen-3-yl)pyrimidin-2-amine (3ap)**

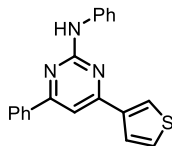

White solid (52 mg, 79% yield), purified by ethyl acetate:hexane = 1:40. m. p. 129-130 °C. <sup>1</sup>H NMR (600 MHz, CDCl<sub>3</sub>) δ 8.09-8.08 (m, 2H), 7.80 (d, *J* = 3.6 Hz, 1H), 7.76 (d, *J* = 8.4 Hz, 2H), 7.52-7.48 (m, 4H), 7.44 (s, 1H), 7.36 (t, *J* = 7.8 Hz, 2H), 7.30 (s, 1H), 7.15-7.14 (m, 1H), 7.04 (t, *J* = 7.8 Hz, 1H) ppm; <sup>13</sup>C NMR (151 MHz, CDCl<sub>3</sub>) δ 165.8, 160.4, 160.2, 143.4, 140.0, 137.6, 130.8, 129.5, 129.0, 128.9, 128.3, 127.3, 127.1, 122.3, 119.1, 103.0 ppm; IR (KBr): ν 3381, 2832, 1593, 1575, 1531, 1519, 1494, 1458, 1444, 1426, 1354, 1338, 1243, 1210, 1179, 1072, 983, 888, 859, 833, 768, 759, 745, 718, 691, 631, 582 cm<sup>-1</sup>; HRMS (ESI) *m/z*: [M + H]<sup>+</sup> Calcd. for C<sub>20</sub>H<sub>16</sub>N<sub>3</sub>S 330.1059, Found 330.1070.

**4-(furan-2-yl)-N,6-diphenylpyrimidin-2-amine (3aq)**

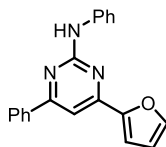

White solid (38 mg, 61% yield), purified by ethyl acetate:hexane = 1:45. m. p. 140-142 °C. <sup>1</sup>H NMR (600 MHz, CDCl<sub>3</sub>) δ 8.14-8.12 (m, 2H), 7.76 (d, *J* = 7.8 Hz, 2H), 7.61 (s, 1H), 7.53-7.50 (m, 4H), 7.37 (t, *J* = 7.8 Hz, 2H), 7.33 (d, *J* = 4.8 Hz, 1H), 7.26 (d, *J* = 3.6 Hz, 1H), 7.05 (t, *J* = 7.8 Hz, 1H), 6.59-6.58 (m, 1H) ppm; <sup>13</sup>C NMR (151 MHz, CDCl<sub>3</sub>) δ 165.8, 160.3, 156.9, 152.5, 144.8, 140.1, 137.5, 130.9, 129.0, 128.9, 127.3, 122.3, 119.1, 112.5, 112.0, 102.7 ppm; IR (KBr): ν 3405, 2925, 2832, 2716, 1599, 1538, 1497, 1482, 1445, 1433, 1365, 1342, 1251, 1166, 1072, 1011, 883, 823, 773, 755, 707, 692, 641 cm<sup>-1</sup>; HRMS (ESI) *m/z*: [M + H]<sup>+</sup> Calcd. for C<sub>20</sub>H<sub>16</sub>N<sub>3</sub>O 314.1288, Found 314.1293.

**N,4-diphenyl-6-(*o*-tolyl)pyrimidin-2-amine (3ar)**

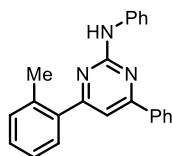

White solid (41 mg, 61% yield), purified by ethyl acetate:hexane = 1:45. m. p. 131-132 °C.  $^1\text{H}$  NMR (600 MHz,  $\text{CDCl}_3$ )  $\delta$  8.12-8.10 (m, 2H), 7.73 (d,  $J = 8.4$  Hz, 2H), 7.52-7.47 (m, 5H), 7.37-7.30 (m, 5H), 7.28 (s, 1H), 7.02 (t,  $J = 7.2$  Hz, 1H), 2.49 (s, 3H) ppm;  $^{13}\text{C}$  NMR (151 MHz,  $\text{CDCl}_3$ )  $\delta$  169.1, 165.2, 160.1, 140.0, 138.9, 137.5, 136.1, 131.2, 130.8, 129.3, 128.98, 128.97, 127.3, 126.2, 122.3, 119.1, 108.8, 20.6 ppm; IR (KBr):  $\nu$  3407, 2832, 1592, 1540, 1527, 1493, 1456, 1442, 1429, 1398, 1366, 1348, 1305, 1247, 1208, 1180, 1068, 1029, 1010, 989, 895, 824, 769, 728, 691, 638, 562  $\text{cm}^{-1}$ ; HRMS (ESI)  $m/z$ :  $[\text{M} + \text{H}]^+$  Calcd. for  $\text{C}_{23}\text{H}_{20}\text{N}_3$  338.1652, Found 338.1662.

#### 4-(2-bromophenyl)-N,6-diphenylpyrimidin-2-amine (3as)

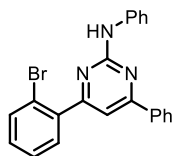

White solid (60 mg, 75% yield), purified by ethyl acetate:hexane = 1:42. m. p. 131-132 °C.  $^1\text{H}$  NMR (600 MHz,  $\text{CDCl}_3$ )  $\delta$  8.14-8.12 (m, 2H), 7.77 (d,  $J = 7.8$  Hz, 2H), 7.72 (d,  $J = 7.8$  Hz, 1H), 7.62 (dd,  $J = 7.8, 1.8$  Hz, 1H), 7.53-7.51 (m, 3H), 7.48-7.44 (m, 2H), 7.39-7.35 (m, 3H), 7.33-7.30 (m, 1H), 7.04 (t,  $J = 7.2$  Hz, 1H) ppm;  $^{13}\text{C}$  NMR (151 MHz,  $\text{CDCl}_3$ )  $\delta$  167.2, 165.1, 160.3, 139.91, 139.85, 137.4, 133.8, 131.1, 130.9, 130.7, 129.1, 129.0, 127.8, 127.4, 122.4, 121.5, 119.1, 109.4 ppm; IR (KBr):  $\nu$  3407, 2832, 1592, 1540, 1527, 1493, 1456, 1442, 1429, 1398, 1366, 1348, 1305, 1247, 1208, 1180, 1068, 1029, 1010, 989, 895, 824, 769, 728, 691, 638, 562  $\text{cm}^{-1}$ ; HRMS (ESI)  $m/z$ :  $[\text{M} + \text{H}]^+$  Calcd. for  $\text{C}_{22}\text{H}_{17}\text{Br}^{79}\text{N}_3$  402.0600, Found 402.0609.

#### N,4-diphenyl-6-(thiophen-2-yl)pyrimidin-2-amine (3at)

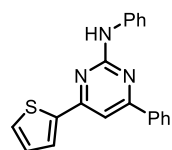

White solid (58 mg, 88% yield), purified by ethyl acetate:hexane = 1:30. m. p.

124-126 °C. <sup>1</sup>H NMR (600 MHz, CDCl<sub>3</sub>) δ 8.10-8.09 (m, 2H), 7.80-7.76 (m, 3H), 7.51-7.45 (m, 5H), 7.37 (t, *J* = 7.8 Hz, 2H), 7.31 (s, 1H), 7.16 (t, *J* = 4.2 Hz, 1H), 7.05 (t, *J* = 7.8 Hz, 1H) ppm; <sup>13</sup>C NMR (151 MHz, CDCl<sub>3</sub>) δ 165.8, 160.4, 160.2, 143.4, 140.0, 137.6, 130.8, 129.6, 129.0, 128.9, 128.3, 127.3, 127.1, 122.3, 119.1, 103.0 ppm; IR (KBr): ν 3389, 2831, 1593, 1576, 1531, 1519, 1495, 1458, 1444, 1426, 1355, 1244, 1210, 1155, 1072, 983, 888, 858, 769, 756, 746, 691, 640, 581 cm<sup>-1</sup>; HRMS (ESI) *m/z*: [M + H]<sup>+</sup> Calcd. for C<sub>20</sub>H<sub>16</sub>N<sub>3</sub>S 330.1059, Found 330.1070.

#### 4-(5-methylfuran-2-yl)-N,6-diphenylpyrimidin-2-amine (3au)

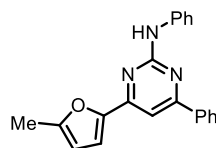

White solid (41 mg, 63% yield), purified by ethyl acetate:hexane = 1:30. m. p. 129-130 °C. <sup>1</sup>H NMR (600 MHz, CDCl<sub>3</sub>) δ 8.14-8.12 (m, 2H), 7.76 (d, *J* = 7.8 Hz, 2H), 7.52-7.47 (m, 4H), 7.36 (t, *J* = 7.8 Hz, 2H), 7.32-7.31 (m, 1H), 7.17 (d, *J* = 3.6 Hz, 1H), 7.03 (t, *J* = 7.2 Hz, 1H), 6.19 (d, *J* = 2.4 Hz, 1H), 2.44 (s, 3H) ppm; <sup>13</sup>C NMR (151 MHz, CDCl<sub>3</sub>) δ 165.6, 160.3, 156.9, 155.4, 150.9, 140.2, 137.6, 130.7, 129.0, 128.9, 127.3, 122.1, 119.0, 113.4, 109.0, 102.3, 14.2 ppm; IR (KBr): ν 3431, 3259, 2832, 1609, 1578, 1538, 1518, 1497, 1459, 1438, 1364, 1254, 1207, 1136, 1083, 1028, 982, 845, 797, 773, 756, 691, 640 cm<sup>-1</sup>; HRMS (ESI) *m/z*: [M + H]<sup>+</sup> Calcd. for C<sub>21</sub>H<sub>18</sub>N<sub>3</sub>O 328.1444, Found 328.1453.

#### *trans*-N,6-diphenyl-4-(*o*-tolyl)-1-tosyl-1,4-dihydropyrimidin-2-amine (*trans*-5ar)

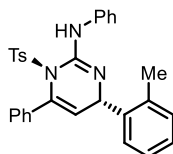

White solid (61 mg, 62% yield), purified by ethyl acetate:hexane = 1:45. m. p. 114-116 °C. <sup>1</sup>H NMR (600 MHz, CDCl<sub>3</sub>) δ 7.75 (d, *J* = 8.4 Hz, 2H), 7.71 (d, *J* = 7.8 Hz, 2H), 7.62 (d, *J* = 7.2 Hz, 2H), 7.47 (s, 1H), 7.40-7.37 (m, 2H), 7.35-7.29 (m, 6H), 7.18-7.04 (m, 4H), 5.90 (s, 1H), 3.73 (s, 1H), 2.42 (s, 3H), 2.00 (s, 3H) ppm; <sup>13</sup>C NMR (151 MHz, CDCl<sub>3</sub>) δ 145.6, 143.1, 141.5, 139.8, 138.3, 136.8, 134.9, 134.1, 130.3, 130.2, 129.1, 128.8, 128.5, 128.1, 127.4, 127.2, 127.0, 126.5, 126.0, 122.9,



118.8, 54.5, 21.8, 19.0 ppm; IR (KBr):  $\nu$  3410, 3261, 1668, 1598, 1525, 1496, 1462, 1440, 1358, 1301, 1252, 1121, 1068, 1017, 971, 921, 900, 772, 735, 664, 596  $\text{cm}^{-1}$ ; HRMS (ESI)  $m/z$ :  $[M + H]^+$  Calcd. for  $\text{C}_{30}\text{H}_{28}\text{N}_3\text{O}_2\text{S}$  494.1897, Found 494.1900.

***trans*-4-(2-bromophenyl)-N,6-diphenyl-1-tosyl-1,4-dihydropyrimidin-2-amine  
(*trans*-5as)**

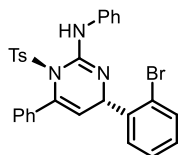

White solid (88 mg, 79% yield), purified by ethyl acetate:hexane = 1:40. m. p. 171-173  $^{\circ}\text{C}$ .  $^1\text{H}$  NMR (600 MHz,  $\text{CDCl}_3$ )  $\delta$  7.74 (d,  $J = 7.8$  Hz, 2H), 7.70 (d,  $J = 7.8$  Hz, 2H), 7.64 (d,  $J = 7.2$  Hz, 2H), 7.51-7.47 (m, 3H), 7.39 (t,  $J = 7.8$  Hz, 2H), 7.36-7.33 (m, 3H), 7.30-7.26 (m, 3H), 7.09-7.06 (m, 2H), 5.89 (d,  $J = 2.4$  Hz, 1H), 3.99 (s, 1H), 2.41 (s, 3H) ppm;  $^{13}\text{C}$  NMR (151 MHz,  $\text{CDCl}_3$ )  $\delta$  145.8, 143.6, 142.2, 139.6, 137.9, 136.8, 134.4, 132.5, 130.5, 129.6, 129.2, 128.8, 128.7, 128.5, 127.9 (3C), 126.6, 126.0, 123.1, 122.3, 119.0, 57.0, 21.9 ppm; IR (KBr):  $\nu$  3378, 3057, 2924, 2832, 1663, 1601, 1538, 1497, 1467, 1442, 1378, 1365, 1311, 1281, 1247, 1186, 1171, 1126, 1087, 1017, 925, 915, 816, 767, 757, 746, 720, 706, 662, 631, 619, 574, 523  $\text{cm}^{-1}$ ; HRMS (ESI)  $m/z$ :  $[M + H]^+$  Calcd. for  $\text{C}_{29}\text{H}_{25}\text{Br}^{79}\text{N}_3\text{O}_2\text{S}$  558.0845, Found 558.0852.

## Computational Details

All geometries were optimized with spin-restricted pure functional B3LYP including Grimme dispersion corrections (GD3BJ) with an all-electron 6-31G(d,p) basis set within the Gaussian16, D.01 suite of *ab initio* programs.<sup>7</sup> Transition structures were found through constrained optimizations along the desired reaction path. The frequency calculations were carried out at the same level to confirm the transition states with only one imaginary frequency. Meanwhile, the single imaginary frequency of each transition state displayed the desired displacement orientation indeed. The single-point calculations were performed with SMD model. According to the experimental reports, MeCN was selected as an effective solvent. The intrinsic reaction coordinate (IRC) calculations were performed to ensure that the transition states led to the expected reactants and products.

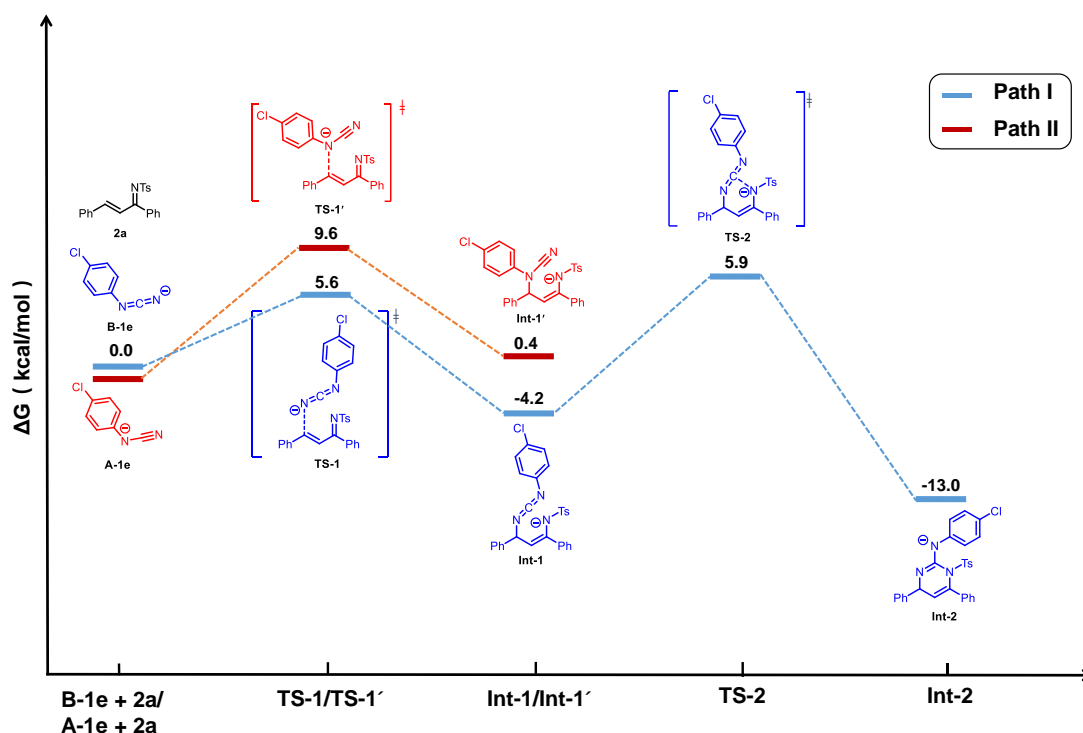

**Figure S1.** Computed energy profiles of selected key steps in the reaction of linear 1-azadiene **2a** with carbodiimide anion **B-1e** (path I) and cyanamide anion **A-1e** (path II).

**Path I**  
**B-1e+2a**

|    |              |             |             |
|----|--------------|-------------|-------------|
| C  | -8.80209300  | -0.39691400 | 1.07860700  |
| C  | -7.49789000  | -0.68057300 | 1.48220900  |
| C  | -6.42609200  | -0.26581700 | 0.69909600  |
| C  | -6.61838800  | 0.44772500  | -0.51644300 |
| C  | -7.96409400  | 0.71342900  | -0.88558300 |
| C  | -9.03780700  | 0.30131500  | -0.10695400 |
| Cl | -10.17648000 | -0.92804700 | 2.08056600  |
| C  | -4.37357900  | 0.66508000  | -1.04184700 |
| N  | -3.21257300  | 0.51360300  | -0.85972400 |
| C  | 0.75348600   | 1.62451800  | 0.15387400  |
| C  | 2.20513600   | 1.60204300  | 0.42630100  |
| C  | 0.42121200   | -0.05577900 | -1.76258800 |
| C  | -0.57359200  | -0.93299600 | -2.23889100 |
| C  | -0.28857000  | -1.84246100 | -3.25724000 |
| C  | 0.97832200   | -1.87358900 | -3.84052500 |
| C  | 1.96200100   | -0.97953700 | -3.40385600 |
| C  | 1.68924300   | -0.08047200 | -2.37563800 |
| C  | 2.85747600   | 2.94826700  | 0.45791700  |
| C  | 2.45698900   | 3.89376000  | -0.50332200 |
| C  | 3.00745600   | 5.17259200  | -0.51470500 |
| C  | 3.94097400   | 5.53870800  | 0.45666400  |
| C  | 4.32384600   | 4.61647900  | 1.43118300  |
| C  | 3.79416700   | 3.32701000  | 1.43366300  |
| N  | 2.73399600   | 0.43537800  | 0.65334100  |
| C  | 4.34167700   | -1.65825600 | 0.84139600  |
| C  | 3.76494800   | -2.37424300 | -0.21034900 |
| C  | 3.79326300   | -3.76422700 | -0.17786300 |
| C  | 4.39572700   | -4.45640400 | 0.88472300  |
| C  | 4.97326100   | -3.71346100 | 1.91951000  |
| C  | 4.94881700   | -2.31774900 | 1.90646600  |
| C  | 4.39563800   | -5.96628800 | 0.91314200  |
| S  | 4.39098900   | 0.13792000  | 0.80370600  |
| O  | 4.91827500   | 0.56065500  | 2.11738100  |
| O  | 5.08951400   | 0.56261400  | -0.42252100 |
| H  | -7.32252800  | -1.22402600 | 2.40616900  |
| H  | -5.41033600  | -0.48724400 | 1.01477400  |
| H  | -8.13442800  | 1.25730200  | -1.81012200 |
| H  | -10.05610900 | 0.51900600  | -0.41524900 |
| H  | 0.21432900   | 2.36859100  | 0.73856300  |
| H  | -1.57154300  | -0.86299300 | -1.80949100 |
| H  | -1.06683300  | -2.51551500 | -3.60643400 |
| H  | 1.19597800   | -2.57308300 | -4.64367600 |

|             |             |             |             |
|-------------|-------------|-------------|-------------|
| H           | 2.94290800  | -0.97578700 | -3.87199000 |
| H           | 2.46335100  | 0.61134900  | -2.06291700 |
| H           | 1.71743100  | 3.61200900  | -1.24573000 |
| H           | 2.70037600  | 5.88443800  | -1.27532500 |
| H           | 4.36291000  | 6.54002200  | 0.45719100  |
| H           | 5.04064400  | 4.89906600  | 2.19674100  |
| H           | 4.10288000  | 2.61687200  | 2.19016000  |
| H           | 3.28379700  | -1.85535700 | -1.03152200 |
| H           | 3.33358300  | -4.32190100 | -0.98983500 |
| H           | 5.44506600  | -4.23053000 | 2.75125000  |
| H           | 5.38683200  | -1.73825500 | 2.71099200  |
| H           | 5.06415900  | -6.35254600 | 1.68767000  |
| H           | 3.39126300  | -6.35695400 | 1.11668400  |
| H           | 4.71331100  | -6.38413600 | -0.04822200 |
| N           | -5.61910900 | 0.88862500  | -1.34211800 |
| C           | 0.01758000  | 0.88574800  | -0.70752000 |
| H           | -1.06586200 | 1.02292200  | -0.65654500 |
| <b>TS-1</b> |             |             |             |
| C           | -4.38491300 | 2.04890000  | 0.71333400  |
| C           | -3.04816900 | 1.80307300  | 0.40049700  |
| C           | -2.26966300 | 1.04928300  | 1.27429100  |
| C           | -2.81419700 | 0.51315300  | 2.46304200  |
| C           | -4.17218200 | 0.77307800  | 2.73979800  |
| C           | -4.95358600 | 1.53808100  | 1.87912500  |
| Cl          | -5.38466500 | 3.01922800  | -0.38853100 |
| C           | -0.84986500 | -0.43726700 | 3.29220900  |
| N           | 0.33118200  | -0.63793100 | 3.34038400  |
| C           | 0.20377500  | -2.49427600 | 1.08523000  |
| C           | -0.01343500 | -1.83676100 | -0.15423200 |
| C           | 2.47924500  | -1.61148000 | 1.86343900  |
| C           | 3.12204000  | -0.69872600 | 2.71272900  |
| C           | 4.46690100  | -0.37734000 | 2.52721200  |
| C           | 5.20514200  | -0.96457500 | 1.49798600  |
| C           | 4.57755400  | -1.87612100 | 0.64650800  |
| C           | 3.23165900  | -2.19424900 | 0.82795500  |
| C           | -0.91787200 | -2.56757600 | -1.10678900 |
| C           | -0.66414300 | -3.91690800 | -1.39859300 |
| C           | -1.51244800 | -4.63812700 | -2.23669600 |
| C           | -2.64393100 | -4.02577700 | -2.77856600 |
| C           | -2.91372300 | -2.68957400 | -2.48031700 |
| C           | -2.05731200 | -1.96011100 | -1.65589200 |
| N           | 0.51761800  | -0.63494700 | -0.36967700 |
| C           | 1.68329500  | 1.44346700  | -1.49390000 |
| C           | 2.90874500  | 1.18993400  | -0.87582400 |

|              |             |             |             |
|--------------|-------------|-------------|-------------|
| C            | 3.81176700  | 2.23386100  | -0.69650800 |
| C            | 3.51665600  | 3.53468300  | -1.13093500 |
| C            | 2.28482100  | 3.76210900  | -1.75394600 |
| C            | 1.36711700  | 2.72625100  | -1.93568500 |
| C            | 4.49407800  | 4.66373500  | -0.90067400 |
| S            | 0.52056000  | 0.10932100  | -1.84580700 |
| O            | -0.76313700 | 0.78614900  | -2.15495200 |
| O            | 1.11383000  | -0.73551000 | -2.90487200 |
| H            | -2.61347000 | 2.17160900  | -0.52230200 |
| H            | -1.23209700 | 0.84905300  | 1.02314500  |
| H            | -4.59821500 | 0.35870000  | 3.64837400  |
| H            | -5.99639400 | 1.73397600  | 2.10740400  |
| H            | -0.51207200 | -3.27396000 | 1.32698100  |
| H            | 2.53801100  | -0.23540700 | 3.49732900  |
| H            | 4.93997900  | 0.33972400  | 3.19381700  |
| H            | 6.25465600  | -0.71632700 | 1.36055700  |
| H            | 5.13316300  | -2.34103000 | -0.16385500 |
| H            | 2.74940700  | -2.90606100 | 0.16672000  |
| H            | 0.21262000  | -4.39142100 | -0.96868900 |
| H            | -1.29091600 | -5.67766100 | -2.46473100 |
| H            | -3.31103900 | -4.58688300 | -3.42808600 |
| H            | -3.79665100 | -2.20706000 | -2.89016500 |
| H            | -2.26984300 | -0.92174100 | -1.43474200 |
| H            | 3.14253400  | 0.19384200  | -0.52078000 |
| H            | 4.75848200  | 2.03271700  | -0.20099700 |
| H            | 2.03456500  | 4.76373300  | -2.09626000 |
| H            | 0.40555000  | 2.90051300  | -2.40527800 |
| H            | 5.52348000  | 4.35211600  | -1.10859700 |
| H            | 4.26713400  | 5.52563900  | -1.53551500 |
| H            | 4.46688800  | 5.00742600  | 0.14123600  |
| N            | -2.10953900 | -0.27662800 | 3.36295000  |
| C            | 1.09300500  | -2.12972500 | 2.10446600  |
| H            | 1.04203500  | -2.77215700 | 2.97979000  |
| <b>Int-1</b> |             |             |             |
| C            | 4.89426500  | 0.99965300  | 0.01164500  |
| C            | 5.28561200  | 0.33328700  | 1.17194800  |
| C            | 4.31032600  | -0.11437000 | 2.06015800  |
| C            | 2.94939000  | 0.11514300  | 1.80415800  |
| C            | 2.57945000  | 0.79010300  | 0.62856600  |
| C            | 3.54852000  | 1.22356200  | -0.27323700 |
| Cl           | 6.13792300  | 1.55581900  | -1.12260000 |
| C            | 0.82730500  | -0.05650200 | 2.85254300  |
| N            | -0.27704100 | 0.24253300  | 3.24968100  |
| C            | -2.13349400 | 1.17581500  | 1.92641100  |

|   |             |             |             |
|---|-------------|-------------|-------------|
| C | -1.72708700 | 1.46623300  | 0.64935200  |
| C | -1.87912800 | -1.39990400 | 2.22892800  |
| C | -1.25316000 | -2.49310700 | 2.84338700  |
| C | -1.51893700 | -3.79862800 | 2.42893200  |
| C | -2.42214800 | -4.03543100 | 1.39237000  |
| C | -3.05452000 | -2.95369700 | 0.77833200  |
| C | -2.78748900 | -1.64931700 | 1.19454600  |
| C | -2.24150600 | 2.75544300  | 0.07001900  |
| C | -1.37290600 | 3.65061700  | -0.57493800 |
| C | -1.83106500 | 4.88532300  | -1.02944100 |
| C | -3.16811200 | 5.25178700  | -0.85910800 |
| C | -4.04462500 | 4.36508600  | -0.23252900 |
| C | -3.58414900 | 3.13112100  | 0.22665400  |
| N | -0.80644200 | 0.67599500  | 0.01054700  |
| C | -0.47578500 | -1.15590600 | -1.88197500 |
| C | 0.58669300  | -1.86709400 | -1.31758500 |
| C | 0.71643900  | -3.22824400 | -1.57399000 |
| C | -0.19736400 | -3.90462800 | -2.39705200 |
| C | -1.24465600 | -3.17126200 | -2.96292100 |
| C | -1.38870500 | -1.80526600 | -2.70922900 |
| C | -0.05994800 | -5.38937500 | -2.64205100 |
| S | -0.66299300 | 0.62230900  | -1.60034300 |
| O | 0.62845700  | 1.22285300  | -2.03193900 |
| O | -1.87033800 | 1.02018100  | -2.36565000 |
| H | 6.33762600  | 0.16208100  | 1.37407600  |
| H | 4.58997900  | -0.64490600 | 2.96487500  |
| H | 1.52817700  | 0.94746700  | 0.39951900  |
| H | 3.23505300  | 1.70998000  | -1.18999000 |
| H | -2.70505000 | 1.93019800  | 2.45530300  |
| H | -0.54858700 | -2.32285500 | 3.65184500  |
| H | -1.01656600 | -4.63022700 | 2.91716200  |
| H | -2.62652600 | -5.05094100 | 1.06276400  |
| H | -3.74743300 | -3.12151100 | -0.04167600 |
| H | -3.27112300 | -0.80812500 | 0.71170000  |
| H | -0.33764700 | 3.36476900  | -0.72854300 |
| H | -1.13962700 | 5.56352800  | -1.52312100 |
| H | -3.52463200 | 6.21306700  | -1.22107100 |
| H | -5.09232600 | 4.62951500  | -0.10856100 |
| H | -4.26928400 | 2.43469100  | 0.70010600  |
| H | 1.30396400  | -1.35808400 | -0.68402500 |
| H | 1.54267000  | -3.77773200 | -1.12797000 |
| H | -1.95925800 | -3.67358600 | -3.61208800 |
| H | -2.19710900 | -1.22901000 | -3.14577400 |
| H | -0.66556200 | -5.71207600 | -3.49477100 |

|             |             |             |             |
|-------------|-------------|-------------|-------------|
| H           | 0.98017800  | -5.67012500 | -2.84229500 |
| H           | -0.38588900 | -5.96971500 | -1.76916400 |
| N           | 2.01928800  | -0.38263300 | 2.72730500  |
| C           | -1.66766000 | 0.02017100  | 2.77149200  |
| H           | -2.25676200 | 0.06849400  | 3.69706800  |
| <b>TS-2</b> |             |             |             |
| C           | -6.38025700 | -0.71121300 | -0.48247400 |
| C           | -5.79636900 | 0.17270000  | 0.42222600  |
| C           | -4.43537700 | 0.07248800  | 0.70101600  |
| C           | -3.63572600 | -0.91006700 | 0.07644300  |
| C           | -4.25966100 | -1.78599200 | -0.83621400 |
| C           | -5.61851600 | -1.69274900 | -1.11617200 |
| Cl          | -8.11839400 | -0.58870100 | -0.83160000 |
| C           | -1.58486500 | -0.29280700 | 1.00095500  |
| N           | -1.47425600 | 0.51239100  | 1.94706600  |
| C           | 0.94827300  | 0.52780600  | 2.34916000  |
| C           | 1.25442800  | -0.40162600 | 1.40476300  |
| C           | -0.18274500 | 2.59189400  | 1.37105400  |
| C           | -0.56391800 | 2.61489000  | 0.02313400  |
| C           | -0.39458900 | 3.77333600  | -0.74016900 |
| C           | 0.15127700  | 4.92707300  | -0.17491900 |
| C           | 0.52871200  | 4.91525500  | 1.16911500  |
| C           | 0.35817300  | 3.75878300  | 1.92949700  |
| C           | 2.41811100  | -1.31061000 | 1.63820300  |
| C           | 3.64191400  | -0.78247500 | 2.08111600  |
| C           | 4.71746100  | -1.61743400 | 2.38183800  |
| C           | 4.59130900  | -3.00031400 | 2.24000100  |
| C           | 3.38173100  | -3.53587500 | 1.79084500  |
| C           | 2.30511000  | -2.70332700 | 1.48881600  |
| N           | 0.36739500  | -0.51706400 | 0.34747200  |
| C           | 2.32366900  | -0.40969200 | -1.56868700 |
| C           | 2.49207600  | 0.97604200  | -1.62493800 |
| C           | 3.72251900  | 1.50211300  | -2.00958600 |
| C           | 4.79639800  | 0.66506600  | -2.34859100 |
| C           | 4.60127400  | -0.71942600 | -2.29387800 |
| C           | 3.37447000  | -1.25960500 | -1.90460900 |
| C           | 6.13543200  | 1.24842900  | -2.73637900 |
| S           | 0.70270100  | -1.11091300 | -1.13531000 |
| O           | -0.27163300 | -0.51104600 | -2.06369900 |
| O           | 0.88118500  | -2.58028600 | -1.19927400 |
| H           | -6.40187000 | 0.93141000  | 0.90803300  |
| H           | -3.97354900 | 0.75150200  | 1.41027100  |
| H           | -3.64248500 | -2.53356200 | -1.32324300 |
| H           | -6.08422400 | -2.37175600 | -1.82299100 |

|              |             |             |             |
|--------------|-------------|-------------|-------------|
| H            | 1.50573800  | 0.54927500  | 3.27935800  |
| H            | -0.97747600 | 1.72648600  | -0.43952600 |
| H            | -0.69582000 | 3.76828200  | -1.78447900 |
| H            | 0.27560300  | 5.82644200  | -0.77273700 |
| H            | 0.94740400  | 5.80793500  | 1.62801300  |
| H            | 0.64922300  | 3.75821600  | 2.97828600  |
| H            | 3.74203000  | 0.29481800  | 2.17159800  |
| H            | 5.65779200  | -1.18635100 | 2.71714500  |
| H            | 5.42945900  | -3.65397600 | 2.46865800  |
| H            | 3.27350500  | -4.61129600 | 1.67447900  |
| H            | 1.37518900  | -3.12040400 | 1.12244300  |
| H            | 1.66839400  | 1.63314200  | -1.36741000 |
| H            | 3.85138400  | 2.58157900  | -2.05015000 |
| H            | 5.42026700  | -1.38561900 | -2.55650900 |
| H            | 3.21676000  | -2.33105800 | -1.85434600 |
| H            | 6.01928600  | 2.13685600  | -3.36645400 |
| H            | 6.70906500  | 1.55463300  | -1.85191700 |
| H            | 6.74443200  | 0.52288100  | -3.28443900 |
| N            | -2.28139100 | -1.08924200 | 0.31446500  |
| C            | -0.32075300 | 1.35121400  | 2.26599800  |
| H            | -0.51665200 | 1.73789800  | 3.27344200  |
| <b>Int-2</b> |             |             |             |
| C            | 6.32419000  | -0.43022800 | 0.28490600  |
| C            | 5.60969500  | 0.29594400  | -0.66298600 |
| C            | 4.22246300  | 0.17286000  | -0.73817300 |
| C            | 3.50847100  | -0.68395600 | 0.14397300  |
| C            | 4.28392000  | -1.40411700 | 1.09179400  |
| C            | 5.66478300  | -1.28630900 | 1.16895400  |
| Cl           | 8.09900000  | -0.27288900 | 0.37061800  |
| C            | 1.28410700  | -0.25154700 | -0.56089300 |
| N            | 1.44318600  | 0.61900000  | -1.52802300 |
| C            | -0.88055400 | 0.23264600  | -2.23729000 |
| C            | -1.05725900 | -0.68376100 | -1.26623500 |
| C            | -0.19254900 | 2.52414900  | -1.40296800 |
| C            | 0.50461600  | 3.03225600  | -0.30243700 |
| C            | 0.09258500  | 4.21633900  | 0.31669100  |
| C            | -1.01735000 | 4.91539300  | -0.15894200 |
| C            | -1.71437700 | 4.42121600  | -1.26554900 |
| C            | -1.30272800 | 3.23853500  | -1.87846600 |
| C            | -2.02265100 | -1.80401300 | -1.37861400 |
| C            | -3.28325100 | -1.59827500 | -1.96379800 |
| C            | -4.16713100 | -2.65953500 | -2.14754000 |
| C            | -3.81278800 | -3.94680200 | -1.73779200 |
| C            | -2.56763300 | -4.15907300 | -1.14149400 |



|   |             |             |             |
|---|-------------|-------------|-------------|
| C | -1.67877800 | -3.10075500 | -0.95966100 |
| N | -0.10904600 | -0.65723100 | -0.21603700 |
| C | -2.22784000 | -0.20296500 | 1.46152100  |
| C | -2.47411300 | 1.16017600  | 1.27924800  |
| C | -3.77861700 | 1.63362200  | 1.38256700  |
| C | -4.84380000 | 0.76980500  | 1.68091500  |
| C | -4.56614300 | -0.58764500 | 1.87688700  |
| C | -3.26493800 | -1.08003300 | 1.76756900  |
| C | -6.25689400 | 1.29678300  | 1.77070700  |
| S | -0.52466400 | -0.81248100 | 1.43290600  |
| O | 0.26538700  | 0.14580200  | 2.20898600  |
| O | -0.58135100 | -2.22206000 | 1.84714200  |
| H | 6.13543500  | 0.95655700  | -1.34668300 |
| H | 3.66085500  | 0.72902300  | -1.47737900 |
| H | 3.74943100  | -2.05962100 | 1.77260900  |
| H | 6.22842400  | -1.84863300 | 1.90722000  |
| H | -1.43389700 | 0.14689500  | -3.16749500 |
| H | 1.36680700  | 2.48463500  | 0.06096200  |
| H | 0.64300200  | 4.58912200  | 1.17674600  |
| H | -1.33622700 | 5.83591900  | 0.32362600  |
| H | -2.57918100 | 4.95773400  | -1.64959400 |
| H | -1.85515100 | 2.85826700  | -2.73511500 |
| H | -3.56981500 | -0.59192000 | -2.25378000 |
| H | -5.13961100 | -2.47894100 | -2.59877500 |
| H | -4.50406700 | -4.77455200 | -1.87345200 |
| H | -2.28295600 | -5.15627700 | -0.81654000 |
| H | -0.71620300 | -3.26366700 | -0.48897900 |
| H | -1.65628400 | 1.83852600  | 1.06401200  |
| H | -3.96922600 | 2.69330300  | 1.23200000  |
| H | -5.37722400 | -1.27111900 | 2.11640200  |
| H | -3.04397200 | -2.13084800 | 1.91484500  |
| H | -6.30123500 | 2.22866000  | 2.34475400  |
| H | -6.66406000 | 1.51381600  | 0.77508400  |
| H | -6.92444900 | 0.57339000  | 2.24804200  |
| N | 2.15347900  | -0.91446100 | 0.18021900  |
| C | 0.25874400  | 1.22743200  | -2.11058700 |
| H | 0.53051200  | 1.53858700  | -3.13149300 |

**Path II**

**A-1e + 2a**

|   |            |             |             |
|---|------------|-------------|-------------|
| C | 7.75781500 | -0.69490700 | 0.22647500  |
| C | 7.33002900 | 0.48739300  | -0.37585900 |
| C | 5.97561000 | 0.68938600  | -0.61886000 |
| C | 5.00051200 | -0.28363100 | -0.26907100 |
| C | 5.48222300 | -1.47053600 | 0.34220400  |

|    |             |             |             |
|----|-------------|-------------|-------------|
| C  | 6.83383800  | -1.67657200 | 0.58741100  |
| Cl | 9.49141300  | -0.95519200 | 0.53763300  |
| C  | 3.17665800  | 0.93713300  | -1.02579300 |
| N  | 2.63737500  | 1.87871900  | -1.49623100 |
| C  | 0.01873300  | 0.94408900  | 0.88886000  |
| C  | -1.30572700 | 1.50708800  | 0.61580600  |
| C  | 0.01480900  | -1.62049300 | 0.38313500  |
| C  | -1.28347000 | -2.09601300 | 0.64494300  |
| C  | -1.65131900 | -3.38596400 | 0.26477700  |
| C  | -0.74061800 | -4.22008100 | -0.38628300 |
| C  | 0.55453400  | -3.76289700 | -0.64648800 |
| C  | 0.93564700  | -2.48393700 | -0.25373600 |
| C  | -1.27498700 | 2.95247000  | 0.22990600  |
| C  | -2.20278700 | 3.87186500  | 0.74861200  |
| C  | -2.11615600 | 5.22050700  | 0.41203300  |
| C  | -1.11346800 | 5.66715200  | -0.45090700 |
| C  | -0.18464800 | 4.76037900  | -0.96330400 |
| C  | -0.24865000 | 3.41156600  | -0.61707100 |
| N  | -2.36562000 | 0.75126000  | 0.74781000  |
| C  | -4.62595400 | -0.43064900 | 0.04150700  |
| C  | -4.66146900 | -0.96933200 | -1.24371800 |
| C  | -5.22809100 | -2.22720900 | -1.43916000 |
| C  | -5.76566000 | -2.95447800 | -0.36833300 |
| C  | -5.71988800 | -2.38735300 | 0.91311800  |
| C  | -5.15780300 | -1.12939000 | 1.12450000  |
| C  | -6.40821600 | -4.30248700 | -0.59633200 |
| S  | -3.92493800 | 1.20713300  | 0.29373600  |
| O  | -3.99213500 | 1.89916900  | -1.00355700 |
| O  | -4.61567700 | 1.78356600  | 1.46490000  |
| H  | 8.05445300  | 1.24732400  | -0.65368400 |
| H  | 5.64392700  | 1.61127000  | -1.08808800 |
| H  | 4.75685800  | -2.22916300 | 0.62196200  |
| H  | 7.17281600  | -2.59491100 | 1.05725200  |
| H  | 0.76300300  | 1.70796300  | 1.08782200  |
| H  | -1.98767900 | -1.44860900 | 1.14817300  |
| H  | -2.65767300 | -3.73600500 | 0.47726600  |
| H  | -1.03554200 | -5.22333600 | -0.68422700 |
| H  | 1.27032000  | -4.40700700 | -1.15015200 |
| H  | 1.93940000  | -2.11248500 | -0.45159700 |
| H  | -2.98022300 | 3.53598000  | 1.42559000  |
| H  | -2.83390600 | 5.92258200  | 0.82712000  |
| H  | -1.05163500 | 6.72006500  | -0.71431500 |
| H  | 0.60785900  | 5.09541800  | -1.62560700 |
| H  | 0.50797800  | 2.73188700  | -1.00630200 |

|              |             |             |             |
|--------------|-------------|-------------|-------------|
| H            | -4.25289600 | -0.40185900 | -2.07240500 |
| H            | -5.25187200 | -2.65170600 | -2.43963800 |
| H            | -6.13427700 | -2.93577500 | 1.75553000  |
| H            | -5.13672900 | -0.68327700 | 2.11268100  |
| H            | -7.46215200 | -4.19545600 | -0.88319600 |
| H            | -5.90853800 | -4.85261700 | -1.39952000 |
| H            | -6.37786700 | -4.91865500 | 0.30716800  |
| N            | 3.65044800  | -0.15627500 | -0.48068200 |
| C            | 0.53885400  | -0.30553700 | 0.75883100  |
| H            | 1.62433800  | -0.32067600 | 0.85840200  |
| <b>TS-1'</b> |             |             |             |
| C            | -6.38783700 | 0.21571400  | -0.32190200 |
| C            | -5.92662300 | -0.62233700 | -1.33546400 |
| C            | -4.55951800 | -0.82580200 | -1.49189100 |
| C            | -3.62130800 | -0.18691900 | -0.64927900 |
| C            | -4.12137000 | 0.66444900  | 0.36002800  |
| C            | -5.48970500 | 0.85874200  | 0.52663700  |
| Cl           | -8.13095100 | 0.47109200  | -0.11618300 |
| C            | -1.79848100 | -1.10209500 | -1.78314200 |
| N            | -1.35493900 | -1.74436500 | -2.65949900 |
| C            | -0.29361100 | -1.71299800 | 0.67131300  |
| C            | 1.05928600  | -1.69668300 | 0.27894400  |
| C            | -0.82722000 | 0.74110400  | 1.25265800  |
| C            | -0.22371700 | 1.67268000  | 0.39876200  |
| C            | 0.10732900  | 2.94498700  | 0.86166500  |
| C            | -0.15626000 | 3.31196700  | 2.18338500  |
| C            | -0.76175800 | 2.39529600  | 3.04262000  |
| C            | -1.09929300 | 1.12421400  | 2.57551700  |
| C            | 1.75229400  | -3.02869000 | 0.39571800  |
| C            | 1.72615000  | -3.72756800 | 1.61149200  |
| C            | 2.32033100  | -4.98355200 | 1.72510900  |
| C            | 2.93405700  | -5.56874800 | 0.61633300  |
| C            | 2.95499500  | -4.88509300 | -0.60025600 |
| C            | 2.37420900  | -3.62214500 | -0.71273600 |
| N            | 1.65109700  | -0.59093200 | -0.18216700 |
| C            | 3.40343800  | 1.32978800  | -0.52600400 |
| C            | 3.02023100  | 1.95837400  | -1.71230500 |
| C            | 3.15383600  | 3.33965200  | -1.83022500 |
| C            | 3.68084100  | 4.10965000  | -0.78154700 |
| C            | 4.06385600  | 3.45502300  | 0.39475300  |
| C            | 3.92914100  | 2.07192200  | 0.52739100  |
| C            | 3.85907300  | 5.60257000  | -0.93533100 |
| S            | 3.28002300  | -0.46513700 | -0.37999800 |
| O            | 3.73290100  | -0.99165000 | -1.68866600 |

|               |             |             |             |
|---------------|-------------|-------------|-------------|
| O             | 4.06095800  | -0.84242300 | 0.81968000  |
| H             | -6.63133800 | -1.11918600 | -1.99436900 |
| H             | -4.19864100 | -1.48408600 | -2.27566500 |
| H             | -3.42596300 | 1.19077200  | 1.00281700  |
| H             | -5.85498100 | 1.51852900  | 1.30679200  |
| H             | -0.71179500 | -2.70317700 | 0.82041500  |
| H             | -0.01463700 | 1.38863000  | -0.62319900 |
| H             | 0.58651600  | 3.64783300  | 0.18657700  |
| H             | 0.10709100  | 4.30487600  | 2.53897100  |
| H             | -0.97670400 | 2.66691700  | 4.07306300  |
| H             | -1.57497300 | 0.41304700  | 3.24709800  |
| H             | 1.24489600  | -3.26886700 | 2.46965300  |
| H             | 2.30375400  | -5.50475700 | 2.67906400  |
| H             | 3.39396600  | -6.55027500 | 0.70049000  |
| H             | 3.42632400  | -5.33530700 | -1.46977300 |
| H             | 2.40236700  | -3.08886900 | -1.65516200 |
| H             | 2.62766200  | 1.36373800  | -2.53008500 |
| H             | 2.85071500  | 3.82953800  | -2.75301100 |
| H             | 4.47265800  | 4.03444800  | 1.21961100  |
| H             | 4.22814100  | 1.55787000  | 1.43421400  |
| H             | 4.78445800  | 5.84140700  | -1.47563000 |
| H             | 3.03369900  | 6.04936900  | -1.49943000 |
| H             | 3.91228100  | 6.10138100  | 0.03722600  |
| N             | -2.24297900 | -0.36347500 | -0.77720200 |
| C             | -1.21601400 | -0.64747000 | 0.84276200  |
| H             | -2.10091600 | -0.97240100 | 1.38935500  |
| <b>Int-1'</b> |             |             |             |
| C             | -5.78589200 | -0.91949400 | -0.53779500 |
| C             | -5.09760200 | -0.90556300 | -1.74885500 |
| C             | -3.71033900 | -1.00125300 | -1.75542200 |
| C             | -2.98561700 | -1.11158000 | -0.55240600 |
| C             | -3.70158000 | -1.11374900 | 0.65876100  |
| C             | -5.09245900 | -1.02098900 | 0.66314500  |
| Cl            | -7.55103800 | -0.80140400 | -0.52865600 |
| C             | -0.97180200 | -1.27786600 | -1.76093500 |
| N             | -0.56793100 | -1.29912600 | -2.85679700 |
| C             | 0.55671700  | -2.18640200 | 0.40203200  |
| C             | 1.69413100  | -1.50947600 | 0.01997400  |
| C             | -0.77911100 | -0.44278100 | 1.69476800  |
| C             | -0.74739500 | 0.90397900  | 1.32300800  |
| C             | -0.72630000 | 1.90605800  | 2.29480500  |
| C             | -0.73858300 | 1.57829000  | 3.65089600  |
| C             | -0.77025100 | 0.23548600  | 4.03232700  |
| C             | -0.79144900 | -0.76314700 | 3.05947300  |

|   |             |             |             |
|---|-------------|-------------|-------------|
| C | 2.94222800  | -2.34649100 | -0.06815500 |
| C | 3.31487100  | -3.16361400 | 1.01015000  |
| C | 4.43175500  | -3.99504500 | 0.92903400  |
| C | 5.19363100  | -4.02920400 | -0.23975100 |
| C | 4.83270500  | -3.21898600 | -1.31819300 |
| C | 3.72136500  | -2.38072300 | -1.23536500 |
| N | 1.64126700  | -0.19223500 | -0.31778600 |
| C | 2.09639500  | 2.35478800  | -0.51357900 |
| C | 1.17542400  | 2.62436600  | -1.53106900 |
| C | 0.56484600  | 3.87344300  | -1.59086500 |
| C | 0.86774200  | 4.87697700  | -0.65515700 |
| C | 1.79742700  | 4.58659300  | 0.34831200  |
| C | 2.41150200  | 3.33276400  | 0.42344200  |
| C | 0.21520400  | 6.23721400  | -0.74846500 |
| S | 2.94428700  | 0.75974300  | -0.45437600 |
| O | 3.63370700  | 0.65280600  | -1.76738700 |
| O | 3.82403700  | 0.79321400  | 0.74106800  |
| H | -5.63967700 | -0.82366500 | -2.68469200 |
| H | -3.17910200 | -0.99679700 | -2.70002500 |
| H | -3.18213700 | -1.15732000 | 1.60583200  |
| H | -5.62942900 | -1.02042500 | 1.60543400  |
| H | 0.61828100  | -3.26402800 | 0.49788900  |
| H | -0.71913600 | 1.16497000  | 0.27301500  |
| H | -0.68206900 | 2.94584600  | 1.98406700  |
| H | -0.71933900 | 2.36124800  | 4.40458500  |
| H | -0.77889900 | -0.03509300 | 5.08526600  |
| H | -0.80691500 | -1.80913300 | 3.35942200  |
| H | 2.72176500  | -3.12753600 | 1.91858700  |
| H | 4.70961500  | -4.61158600 | 1.78078900  |
| H | 6.06539400  | -4.67578000 | -0.30722600 |
| H | 5.42135300  | -3.23619900 | -2.23193900 |
| H | 3.45819700  | -1.73721600 | -2.06600200 |
| H | 0.93457200  | 1.85005600  | -2.25204400 |
| H | -0.15909200 | 4.07778000  | -2.37722000 |
| H | 2.04432500  | 5.34931600  | 1.08416600  |
| H | 3.12770400  | 3.09520300  | 1.20269400  |
| H | 0.59262300  | 6.80615100  | -1.60795400 |
| H | -0.87065200 | 6.15518600  | -0.87275500 |
| H | 0.40565100  | 6.83382200  | 0.14892900  |
| N | -1.57655900 | -1.22716200 | -0.56544200 |
| C | -0.78873700 | -1.59344100 | 0.68894500  |
| H | -1.38632100 | -2.39625500 | 1.13872100  |

## References

- [1] (a) C.-C. Wang, Y.-L. Qu, X.-H. Liu, Z.-W. Ma, B. Yang, Z.-J. Liu, X.-P. Chen and Y.-J. Chen, Synthesis of Five-membered Cyclic Guanidines via Cascade [3 + 2] Cycloaddition of  $\alpha$ -Haloamides with Organo-cyanamides, *J. Org. Chem.*, 2021, **86**, 3546-3554; (b) J. N. Ayres, M. T. J. Williams, G. J. Tizzard, et al. Synthesis and Reactivity of N-Allenyl Cyanamides, *Org. Lett.*, 2018, **20**, 5282-5285.
- [2] (a) B. Xiong, Y. Wang, Y. Liu, Y. Bao, Z. Liu, Y. Zhang and Y. Ling, Straightforward synthesis of quinolines from enones and 2-aminobenzyl alcohols using an iridium-catalyzed transfer hydrogenative strategy, *Org. Biomol. Chem.*, 2018, **16**, 5707-5711; (b) J. Tian, R. Zhou, H. Sun, H. Song and Z. He, Phosphine-Catalyzed [4 + 1] Annulation between  $\alpha,\beta$ -Unsaturated Imines and Allylic Carbonates: Synthesis of 2-Pyrrolines, *J. Org. Chem.*, 2011, **76**, 2374-2378; (c) A. Stukalov, V. V. Suslonov and M. A. Kuznetsov, Thermal Ring Expansion of 2-Sulfonylimido-1-phthalimidoaziridines into N-Sulfonylimidazoles, *Eur. J. Org. Chem.*, 2018, 1634-1645.
- [3] N. Belyagoubi-Benhammou, L. Belyagoubi, A. Gismondi, G. Di Marco, A. Canini and F. A. Bekkara, GC/MS analysis, and antioxidant and antimicrobial activities of alkaloids extracted by polar and apolar solvents from the stems of *Anabasis articulata*, *Med. Chem. Res.*, 2019, **28**, 754-767.
- [4] E. Borroni, Gerda, Huber-Trottmann, J. Gaivn, R. D. Norcross, Preparation of pyrimidinamines and pyridinamines as adenosine receptor modulators for treatment of CNS disorders, WO2001062233A2.
- [5] Z. Wang, 2-Amino pyrimidine compound, organic electroluminescent device, and display device, WO2016115718A1.
- [6] S.-Y. Jung, K.-Y. Nam, J.-I. Park, K.-H. Song, J. Ahn, J. K. Park, H.-D. Um, S.-G. Hwang, S. U. Choi, J.-Y. Song, Radiosensitizing effect of novel phenylpyrimidine derivatives on human lung cancer cells via cell cycle perturbation, *J. Pharmacol. Eep. Ther.*, 2019, **370**, 514-527.
- [7] M. J. Frisch, G. W. Trucks, H. B. Schlegel, G. E. Scuseria, M. A. Robb, J. R. Cheeseman, G. Scalmani, V. Barone, G. A. Petersson, H. Nakatsuji, X. Li, M. Caricato, A. V. Marenich, J. Bloino, B. G. Janesko, R. Gomperts, B. Mennucci, H. P.

Hratchian, J. V. Ortiz, A. F. Izmaylov, J. L. Sonnenberg, D. Williams-Young, F. Ding, F. Lipparini, F. Egidi, J. Goings, B. Peng, A. Petrone, T. Henderson, D. Ranasinghe, V. G. Zakrzewski, J. Gao, N. Rega, G. Zheng, W. Liang, M. Hada, M. Ehara, K. Toyota, R. Fukuda, J. Hasegawa, M. Ishida, T. Nakajima, Y. Honda, O. Kitao, H. Nakai, T. Vreven, K. Throssell, J. A. Montgomery, J. E. Peralta Jr., F. Ogliaro, M. J. Bearpark, J. J. Heyd, E. N. Brothers, K. N. Kudin, V. N. Staroverov, T. A. Keith, R. Kobayashi, J. Normand, K. Raghavachari, A. P. Rendell, J. C. Burant, S. S. Iyengar, J. Tomasi, M. Cossi, J. M. Millam, M. Klene, C. Adamo, R. Cammi, J. W. Ochterski, R. L. Martin, K. Morokuma, O. Farkas, J. B. Foresman and D. J. Fox, Gaussian 16, revision C.01, Gaussian, Inc., Wallingford, CT, 2016.

#### 4. Copies of NMR Spectra

8.128  
8.104  
7.772  
7.753  
7.561  
7.527  
7.487  
7.397  
7.337  
7.054  
7.017

4.00  
4.00  
2.04  
1.06  
3.01  
0.97

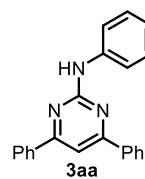

<sup>1</sup>H NMR (400 MHz, CDCl<sub>3</sub>)

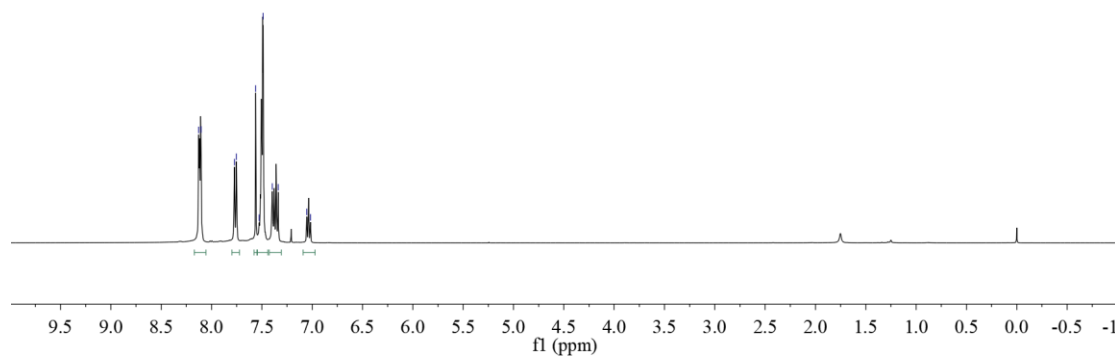

165.92  
160.57  
140.11  
137.74  
130.75  
129.00  
128.95  
127.30  
122.23  
119.13  
104.84

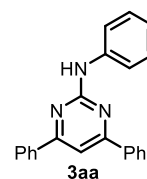

<sup>13</sup>C NMR (100 MHz, CDCl<sub>3</sub>)

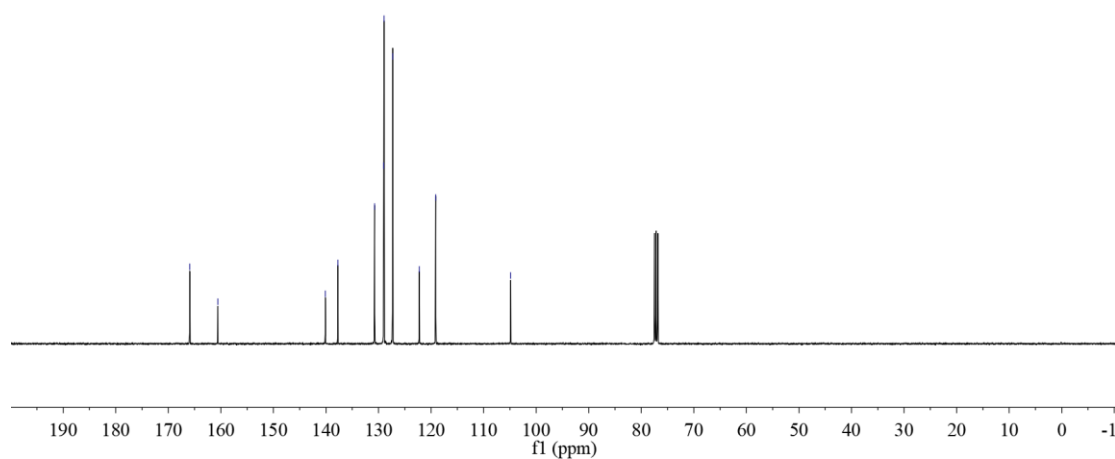



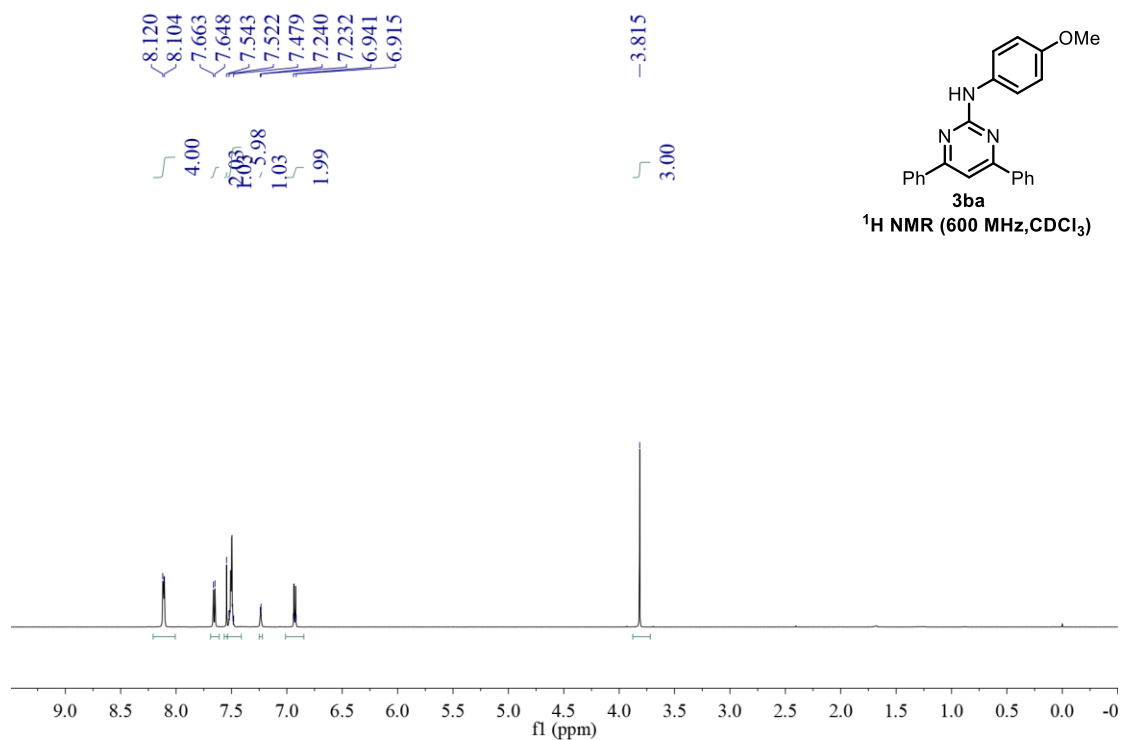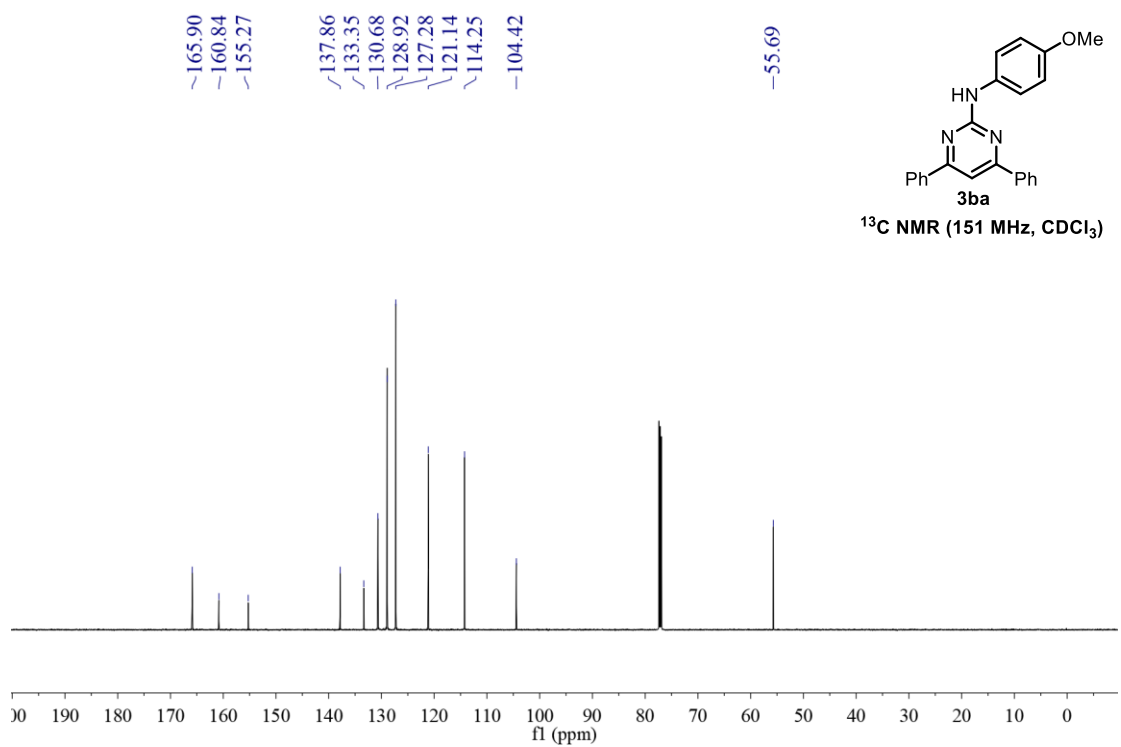

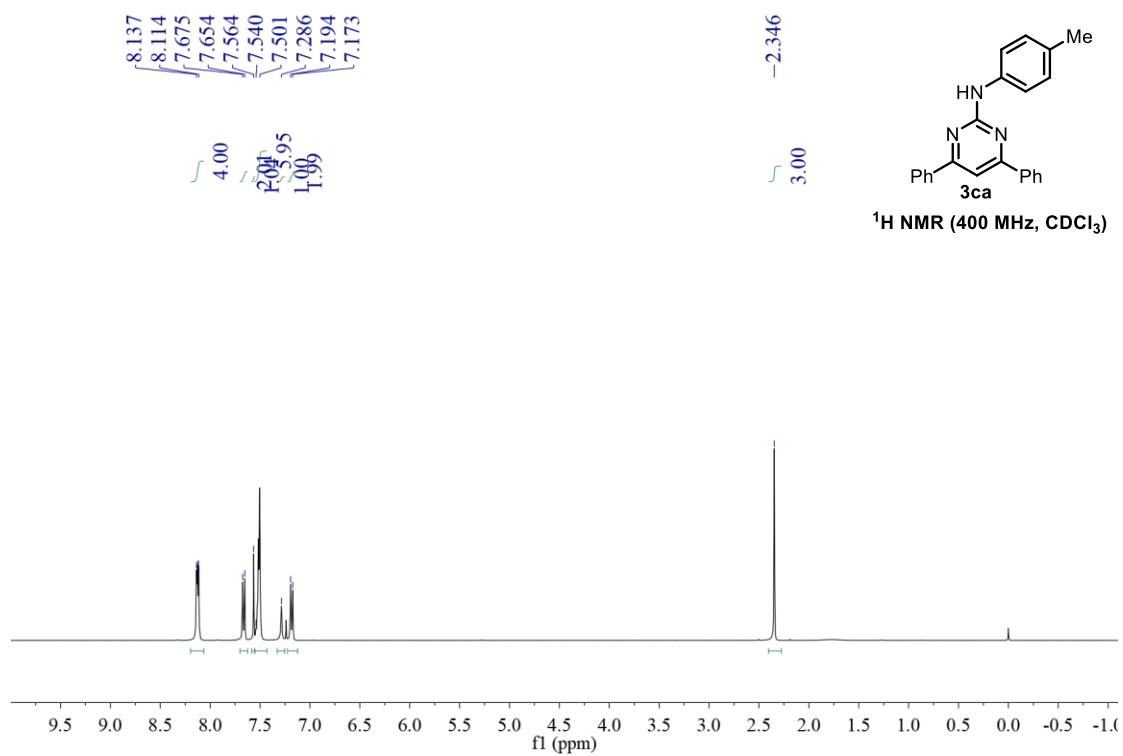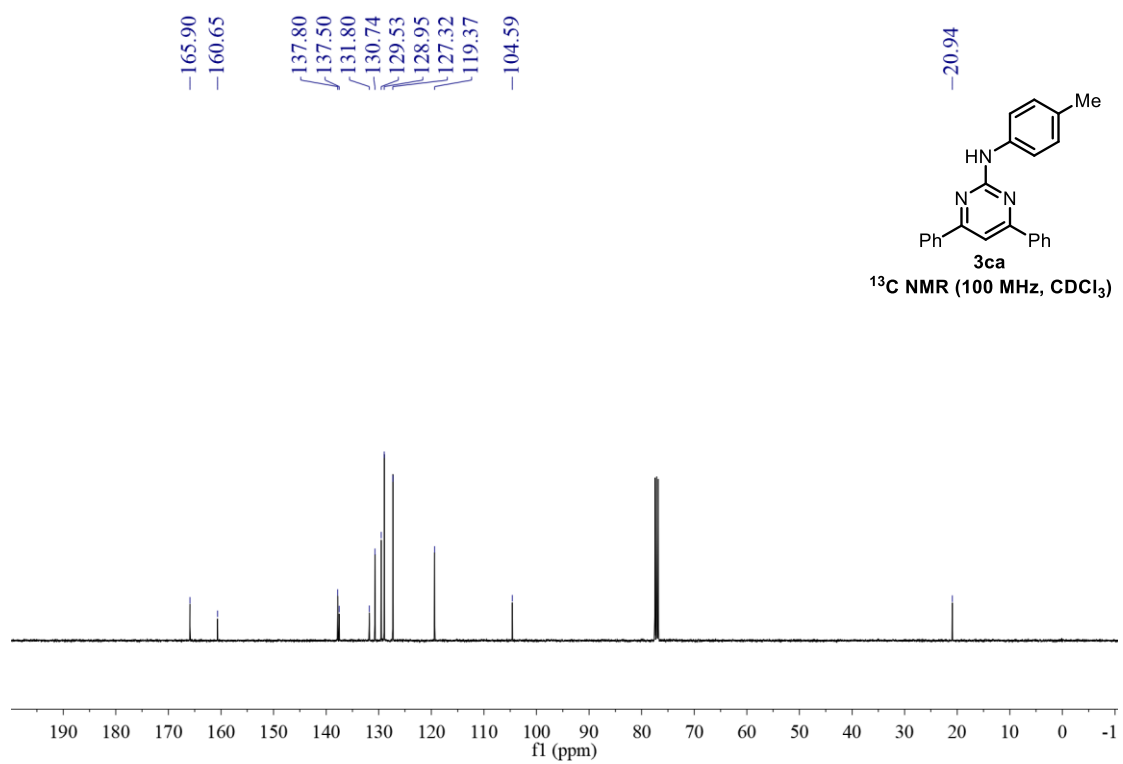

8.116  
8.100  
7.711  
7.676  
7.580  
7.534  
7.494  
7.346  
7.077  
7.036

4.01  
2.01  
2.02  
1.00  
2.00

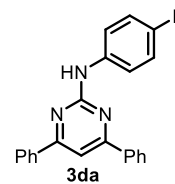

<sup>1</sup>H NMR (600 MHz, CDCl<sub>3</sub>)

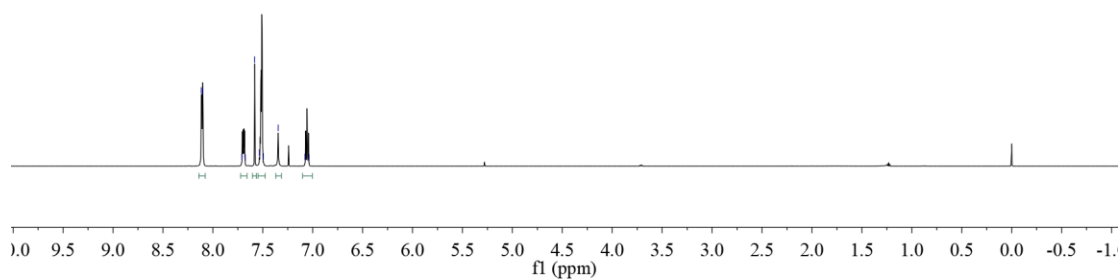

165.99  
160.57  
159.23  
157.63  
137.69  
136.13  
136.12  
130.83  
129.00  
127.30  
120.87  
120.81  
115.61  
115.46  
-104.92

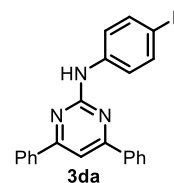

<sup>13</sup>C NMR (151 MHz, CDCl<sub>3</sub>)

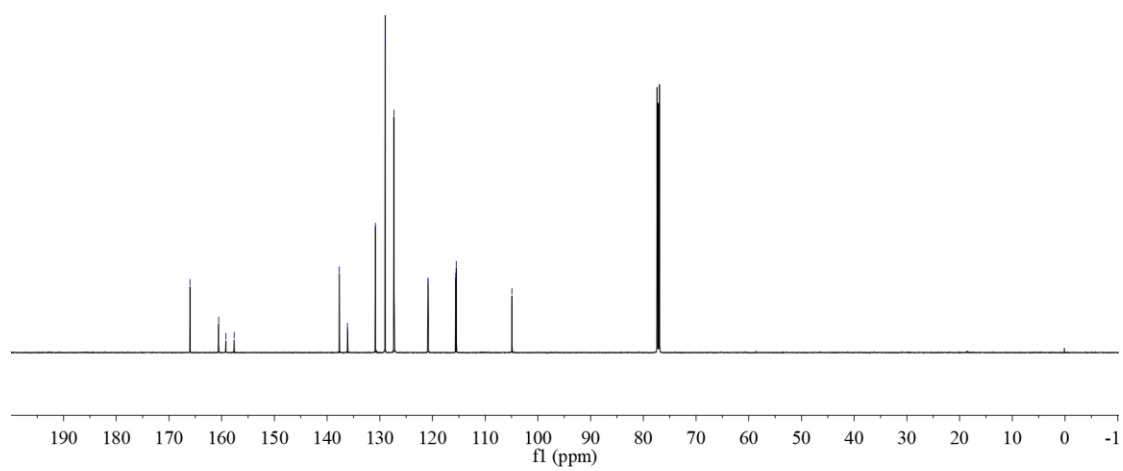

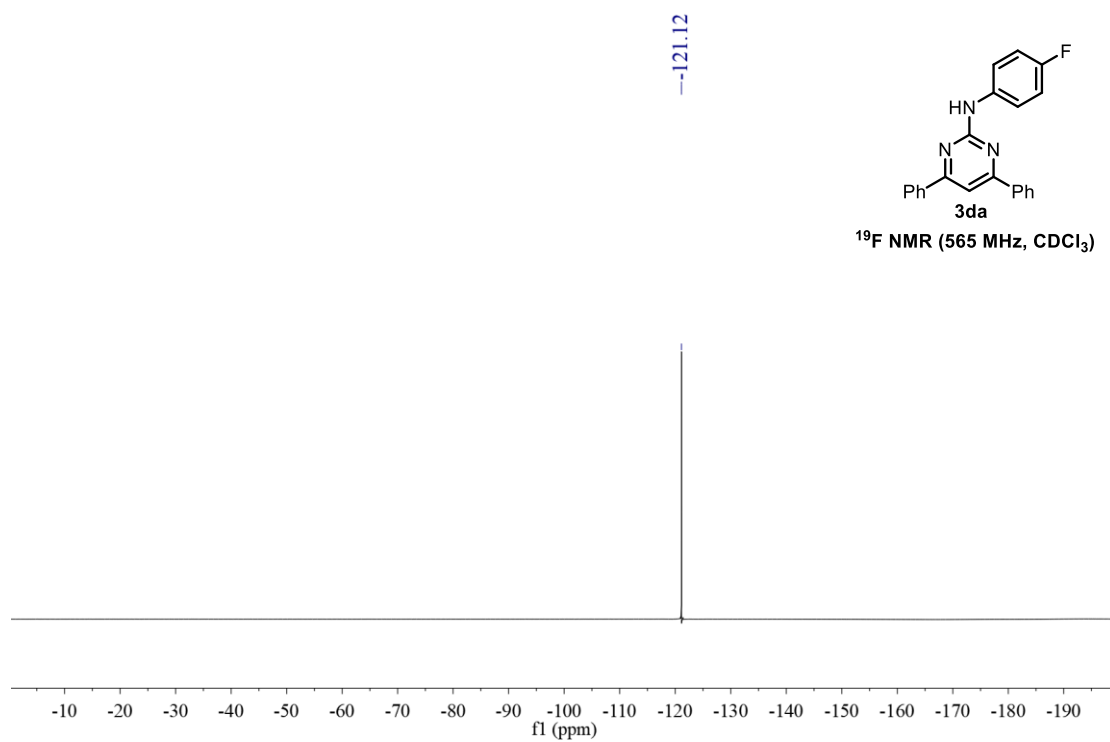

8.111  
8.095  
7.701  
7.686  
7.589  
7.525  
7.502  
7.386  
7.311  
7.296

4.00  
2.00  
2.00

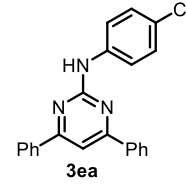

<sup>1</sup>H NMR (600 MHz, CDCl<sub>3</sub>)

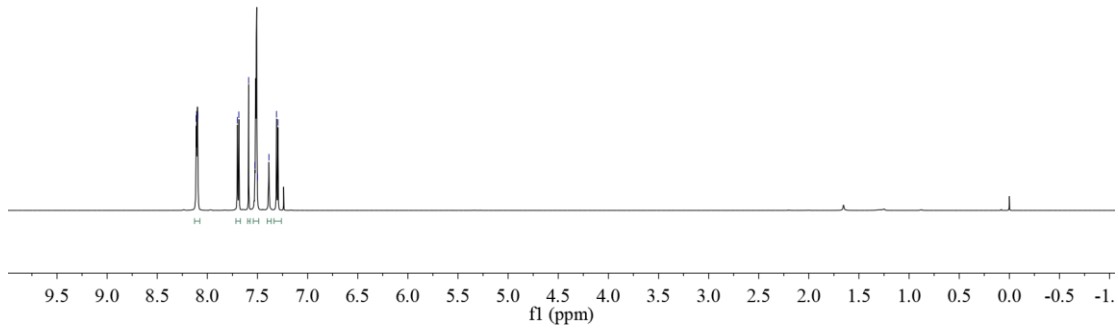

166.00  
160.35  
138.72  
137.60  
130.89  
129.01  
128.94  
127.30  
126.98  
120.31  
105.14

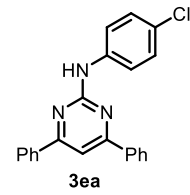

<sup>13</sup>C NMR (151 MHz, CDCl<sub>3</sub>)

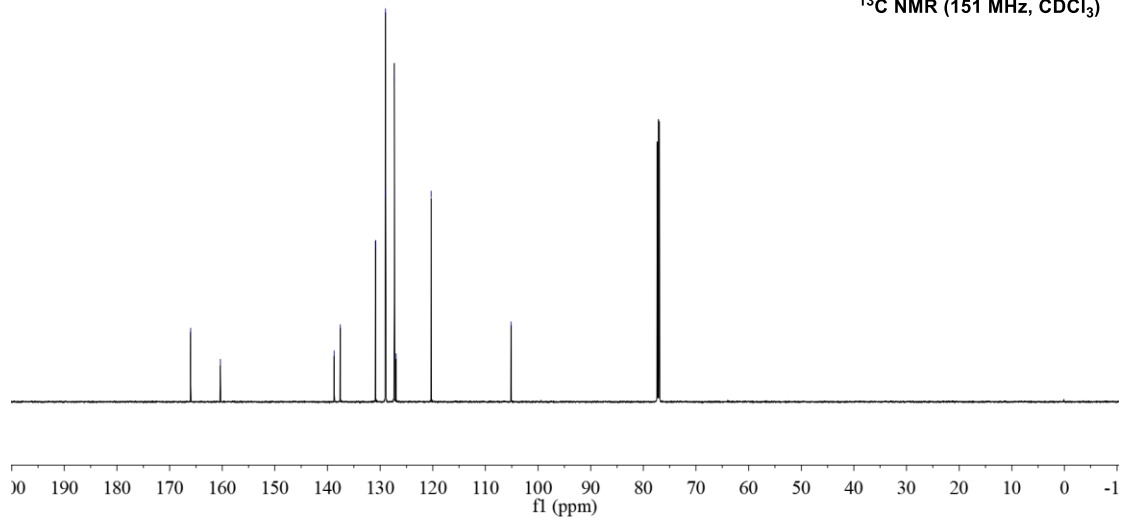

8.118  
8.089  
7.663  
7.638  
7.592  
7.536  
7.503  
7.457  
7.433  
7.377

4.00  
2.01  
1.00

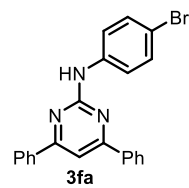

<sup>1</sup>H NMR (600 MHz, CDCl<sub>3</sub>)

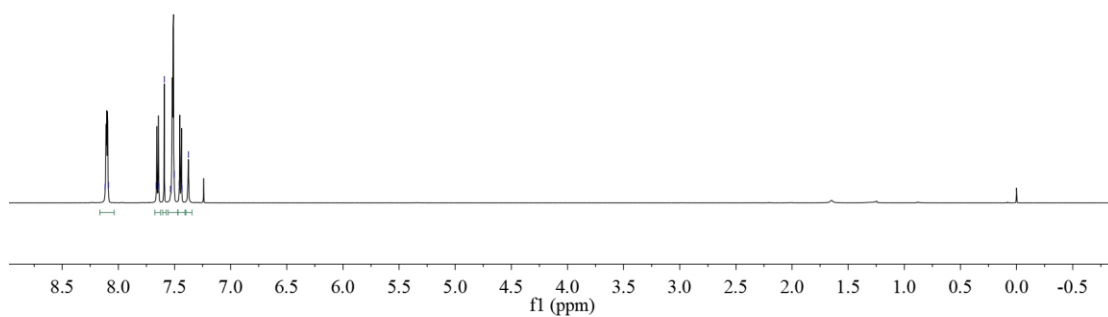

166.00  
160.30

139.22  
137.58  
131.87  
130.90  
129.02  
127.30  
120.68  
114.44  
105.18

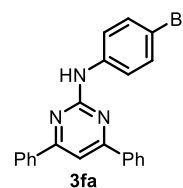

<sup>13</sup>C NMR (151 MHz, CDCl<sub>3</sub>)

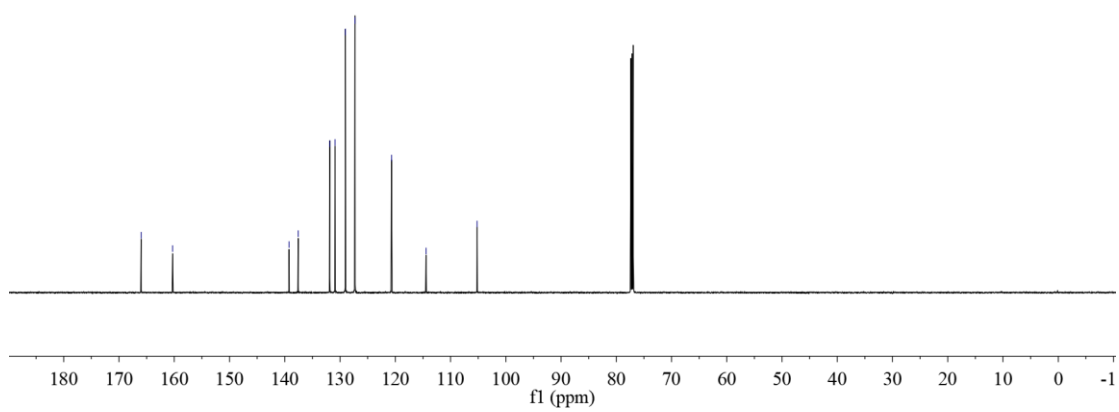

8.127  
8.112  
7.882  
7.867  
7.640  
7.609  
7.573  
7.550  
7.519

4.00  
2.00  
1.38  
1.01

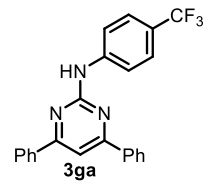

<sup>1</sup>H NMR (600 MHz, CDCl<sub>3</sub>)

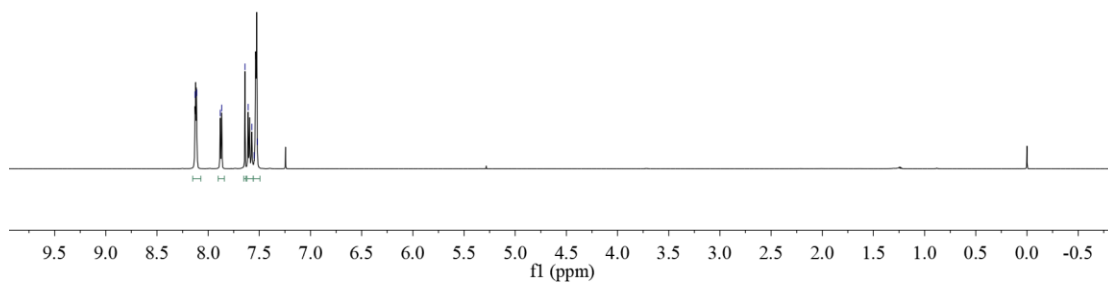

166.10  
160.10  
143.20  
137.42  
131.04  
129.09  
127.33  
126.34  
126.32  
125.55  
123.81  
123.76  
123.59  
118.30  
-105.67

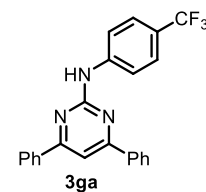

<sup>13</sup>C NMR (151 MHz, CDCl<sub>3</sub>)

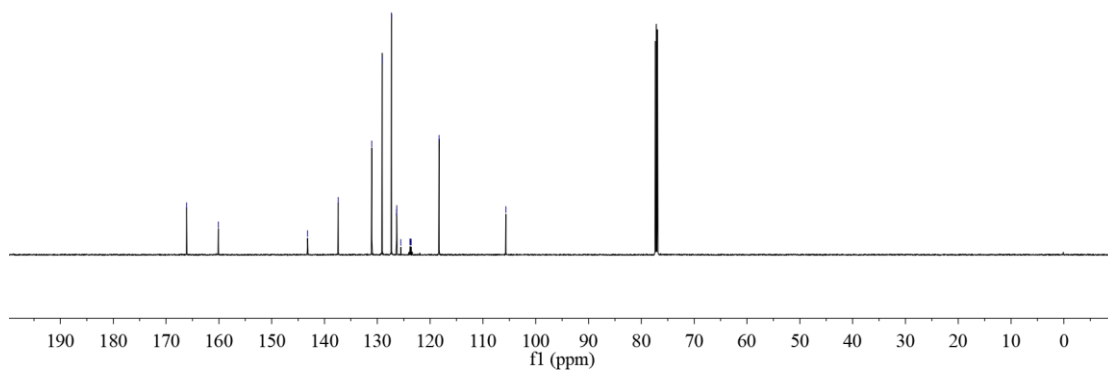

-61.60

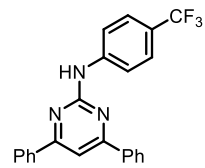

**3ga**

<sup>19</sup>F NMR (565 MHz, CDCl<sub>3</sub>)

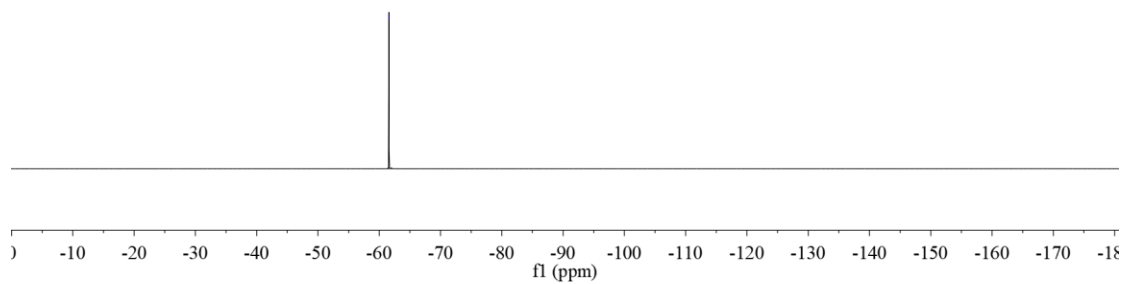



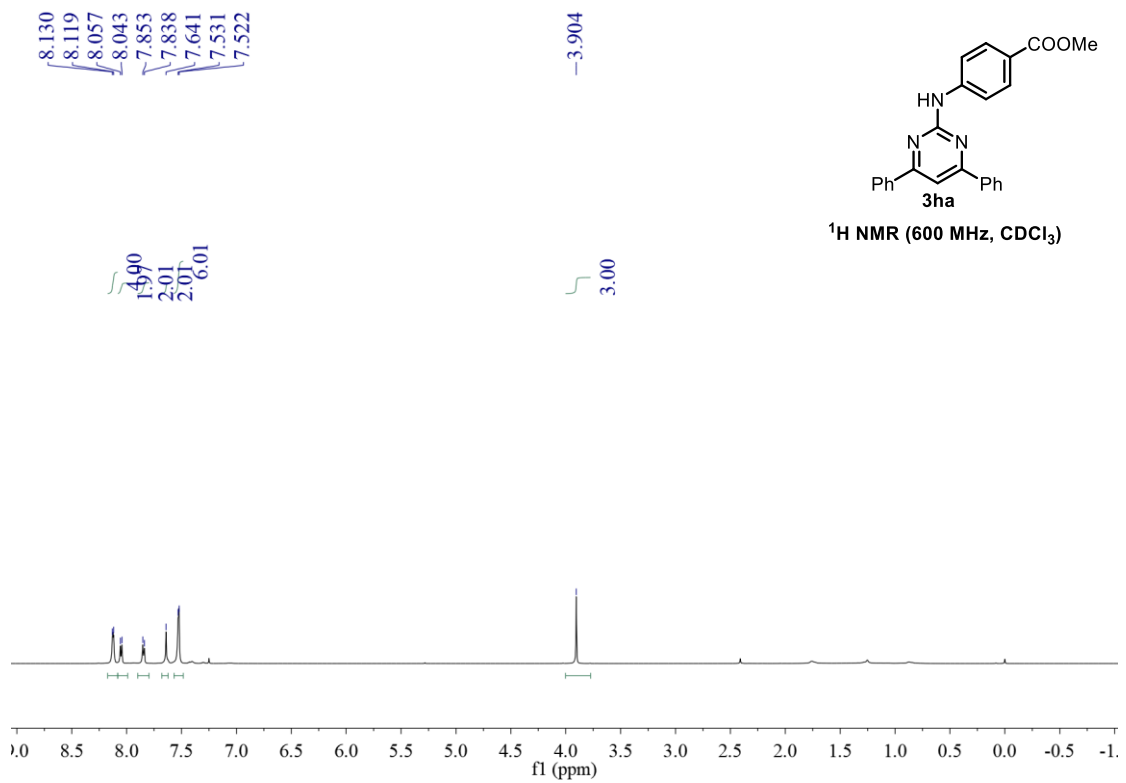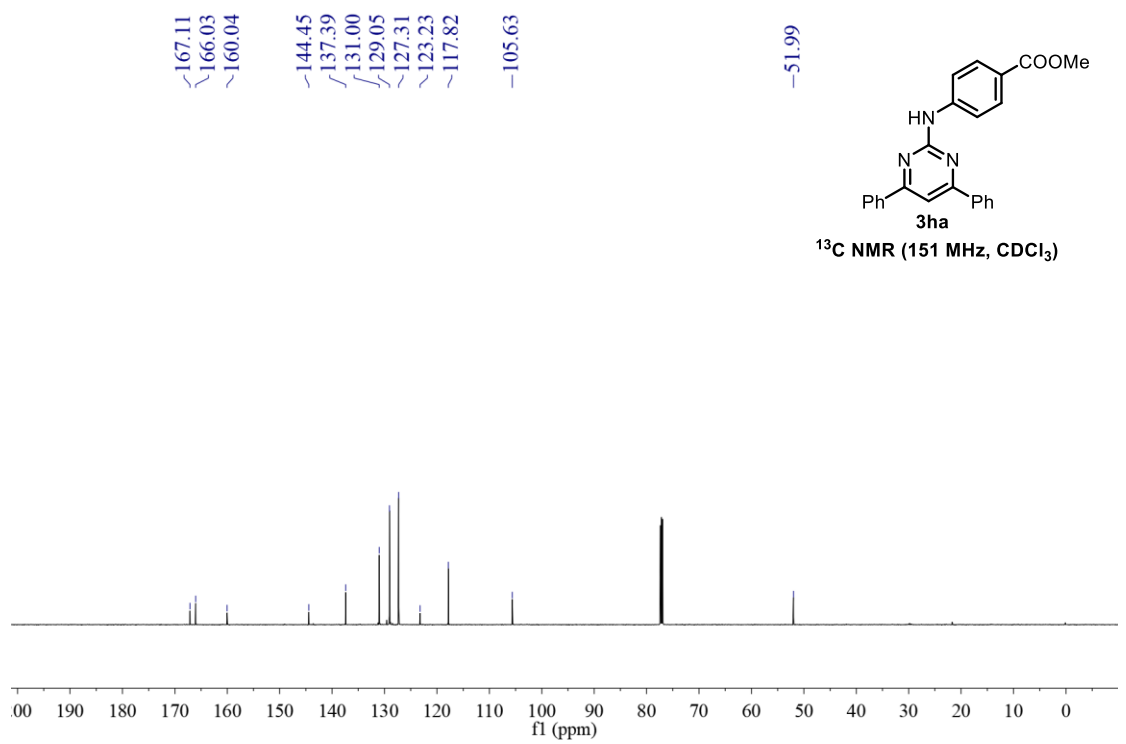

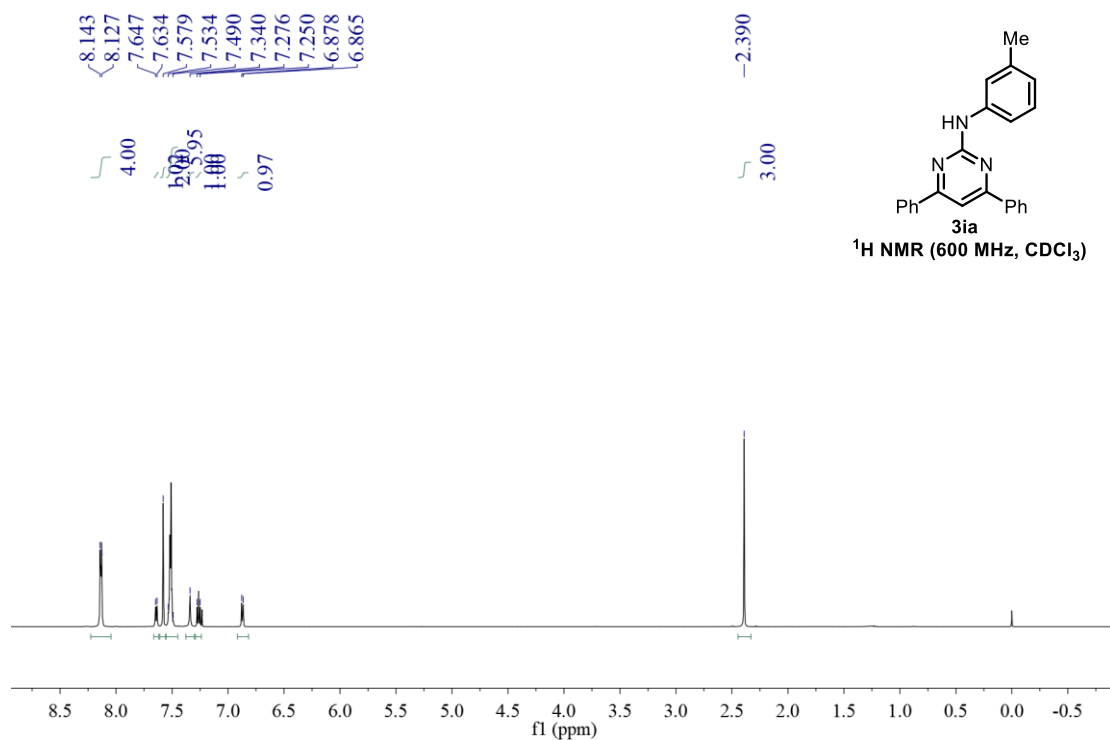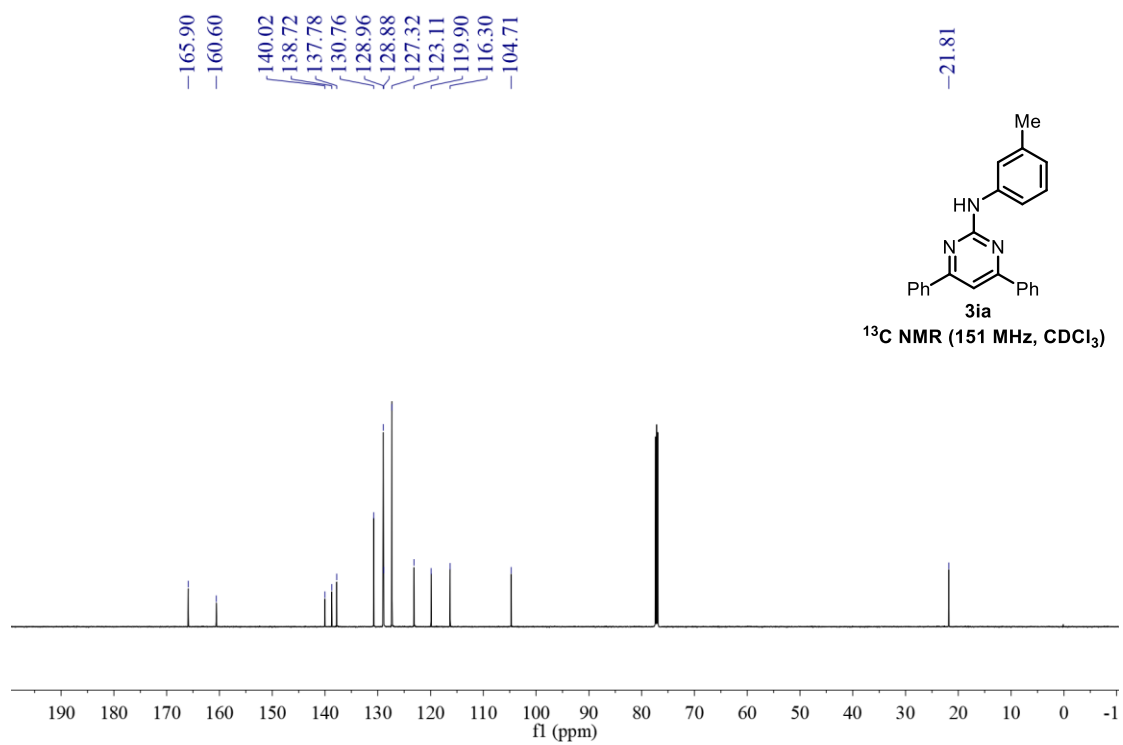

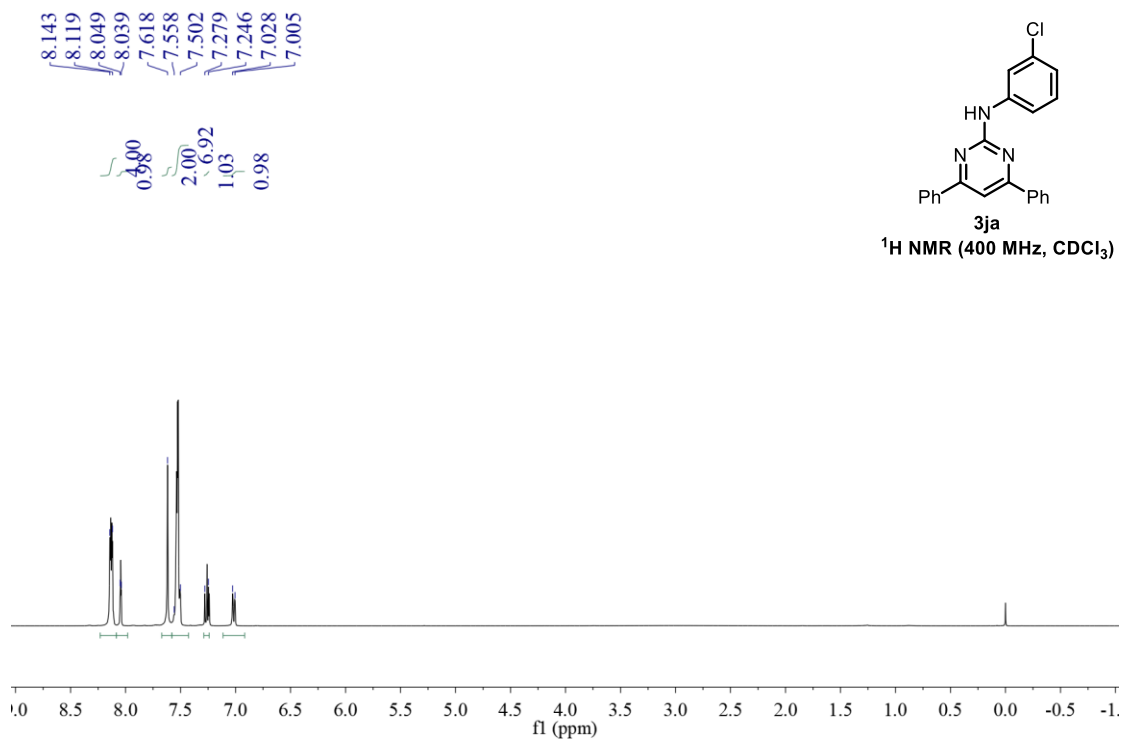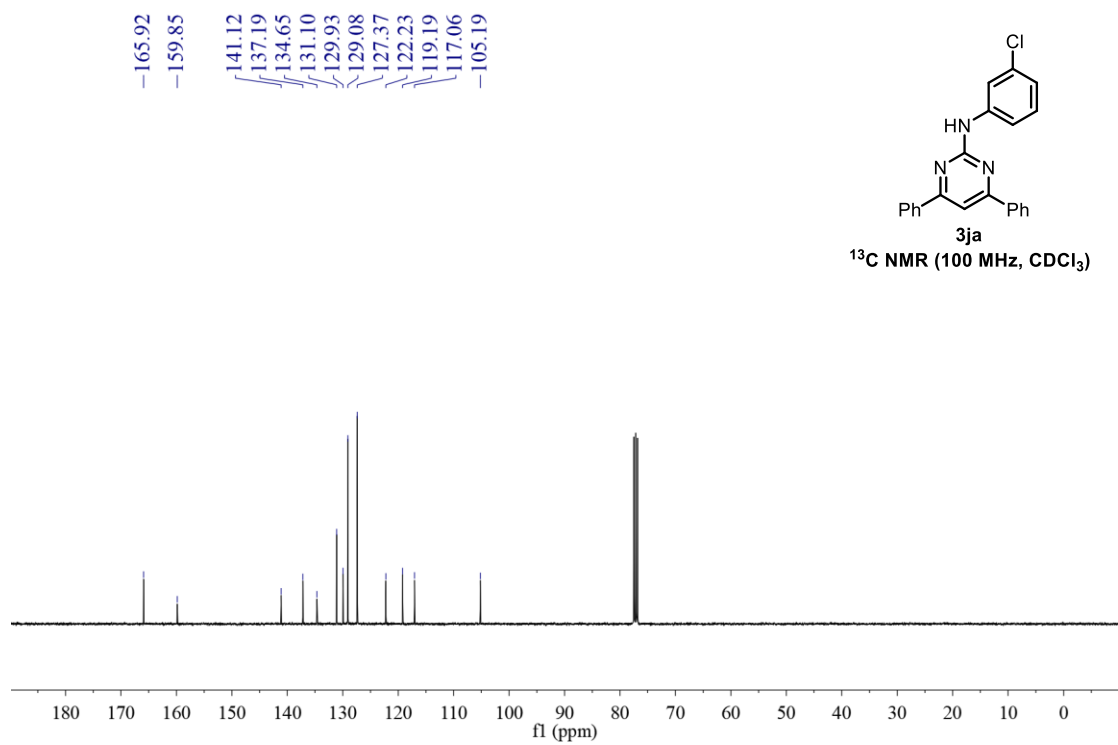

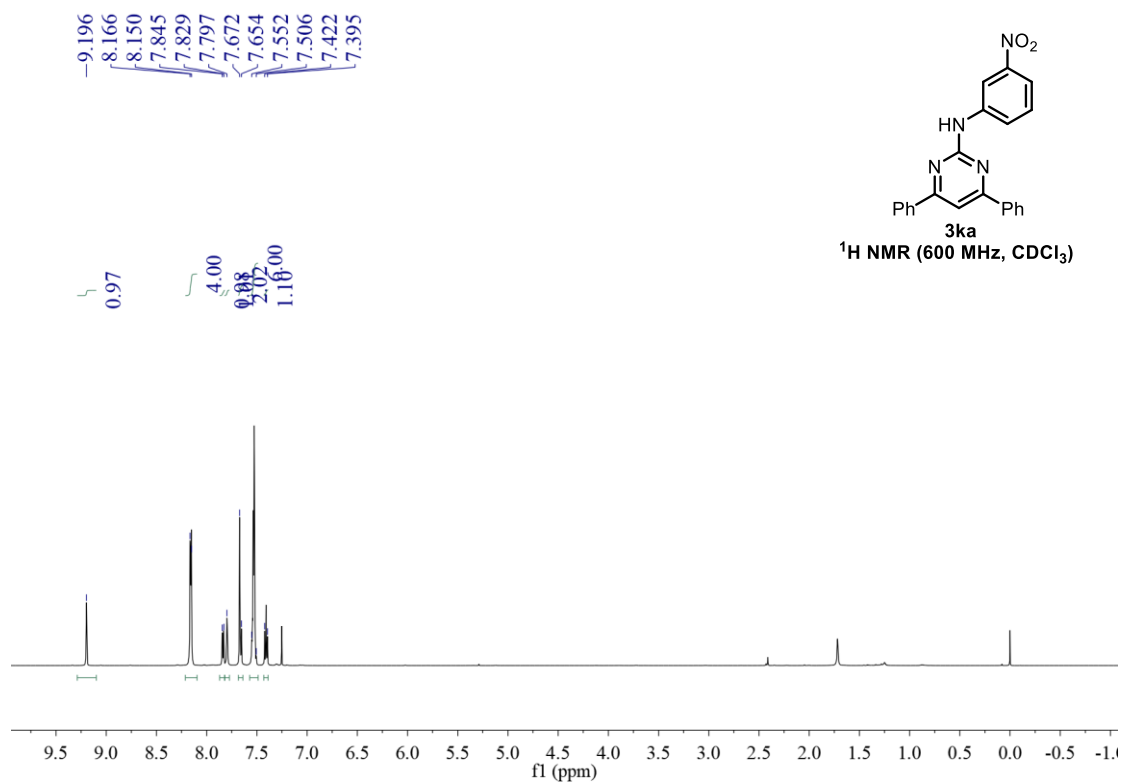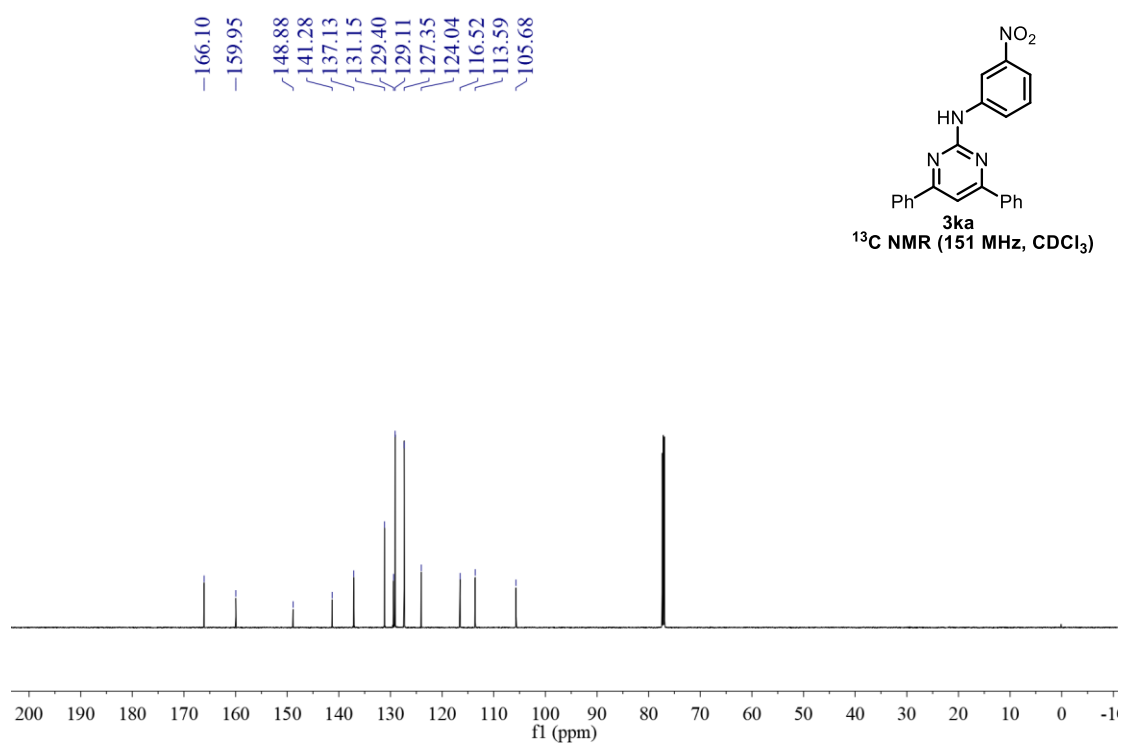

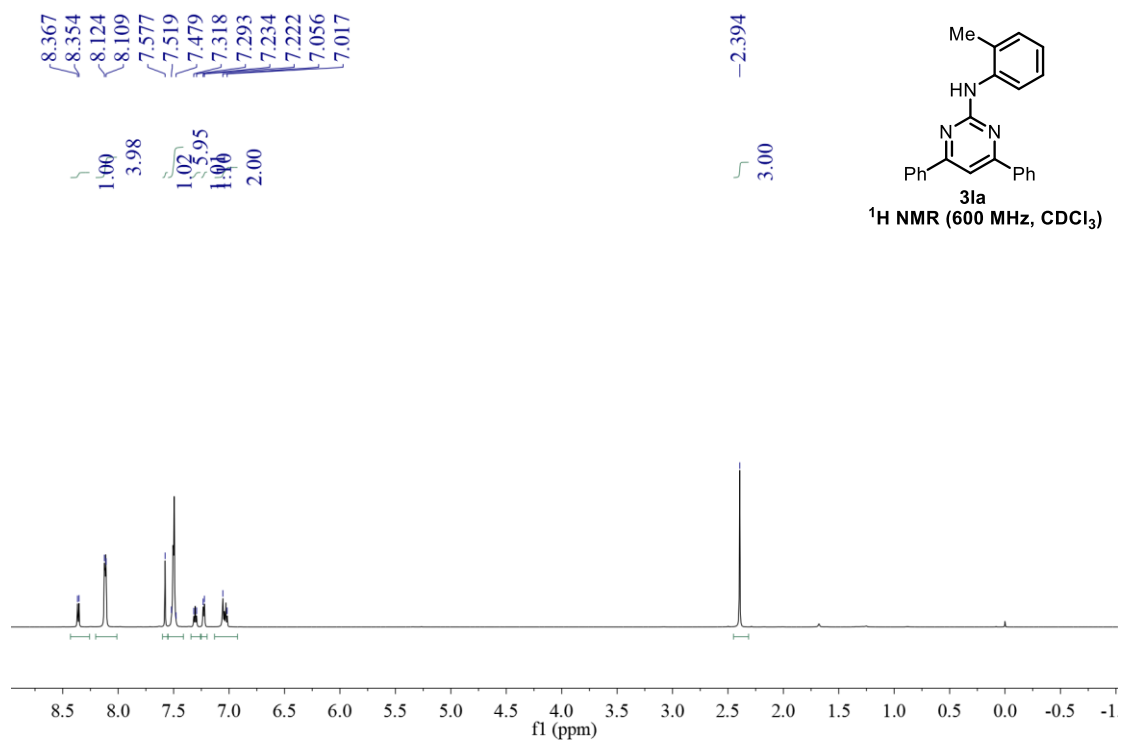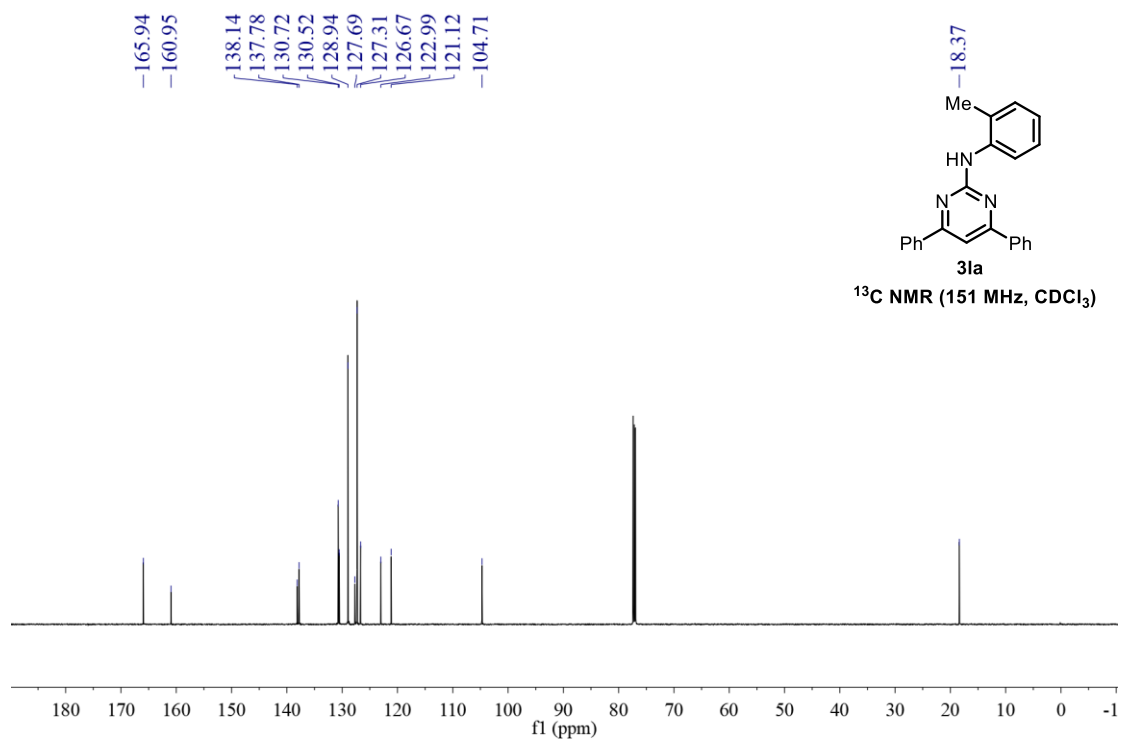

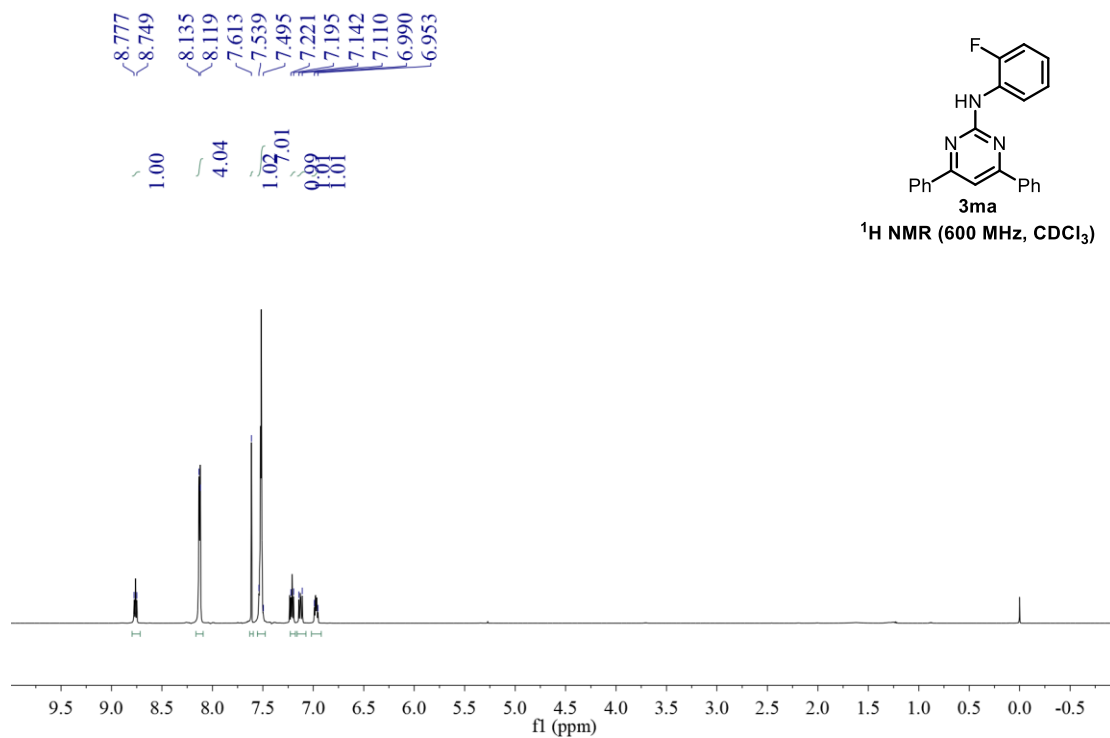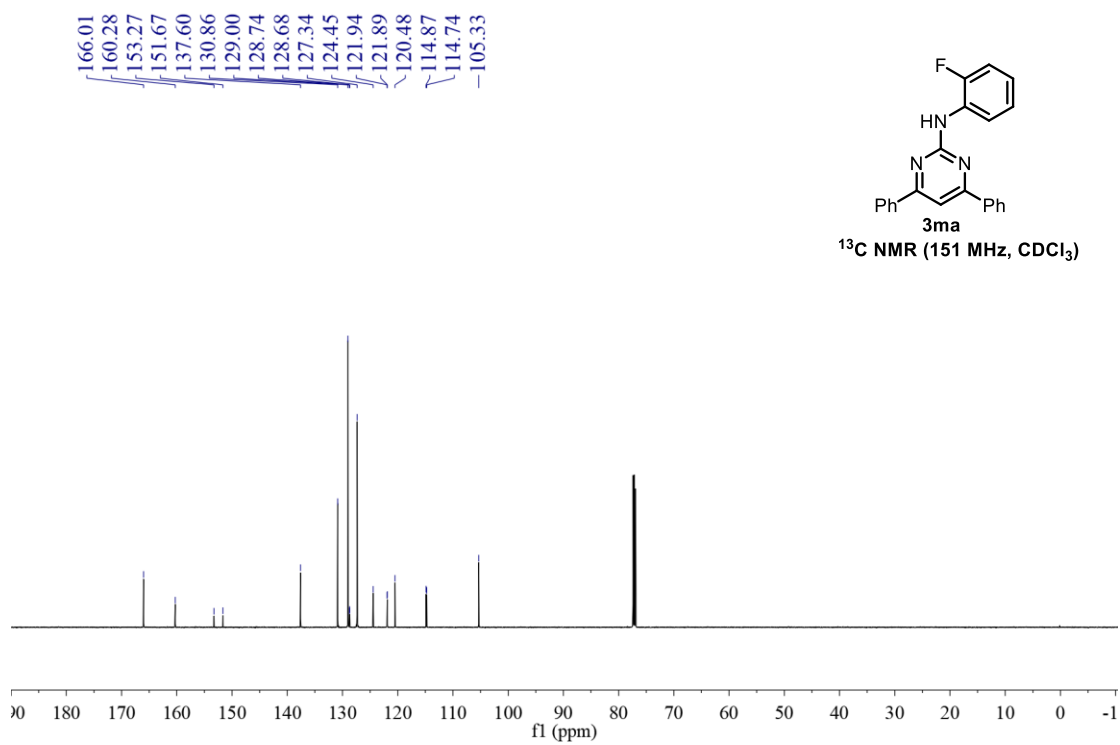

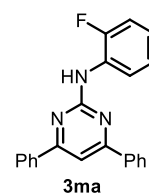

<sup>19</sup>F NMR (565 MHz, CDCl<sub>3</sub>)

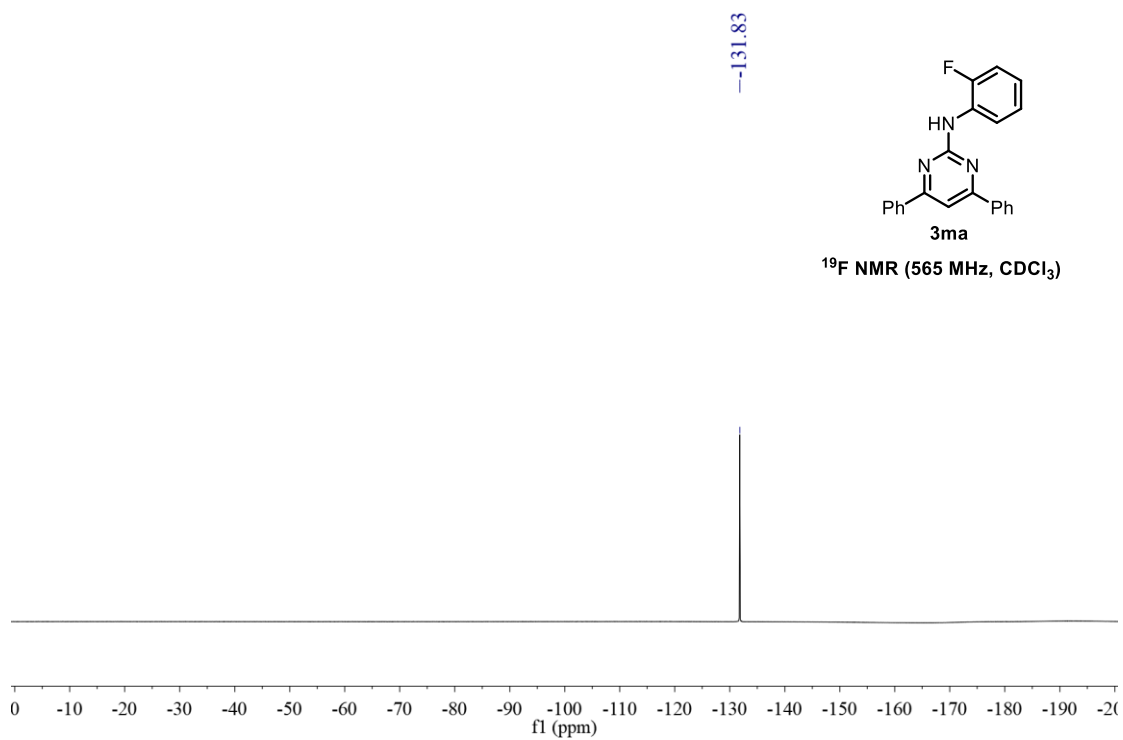

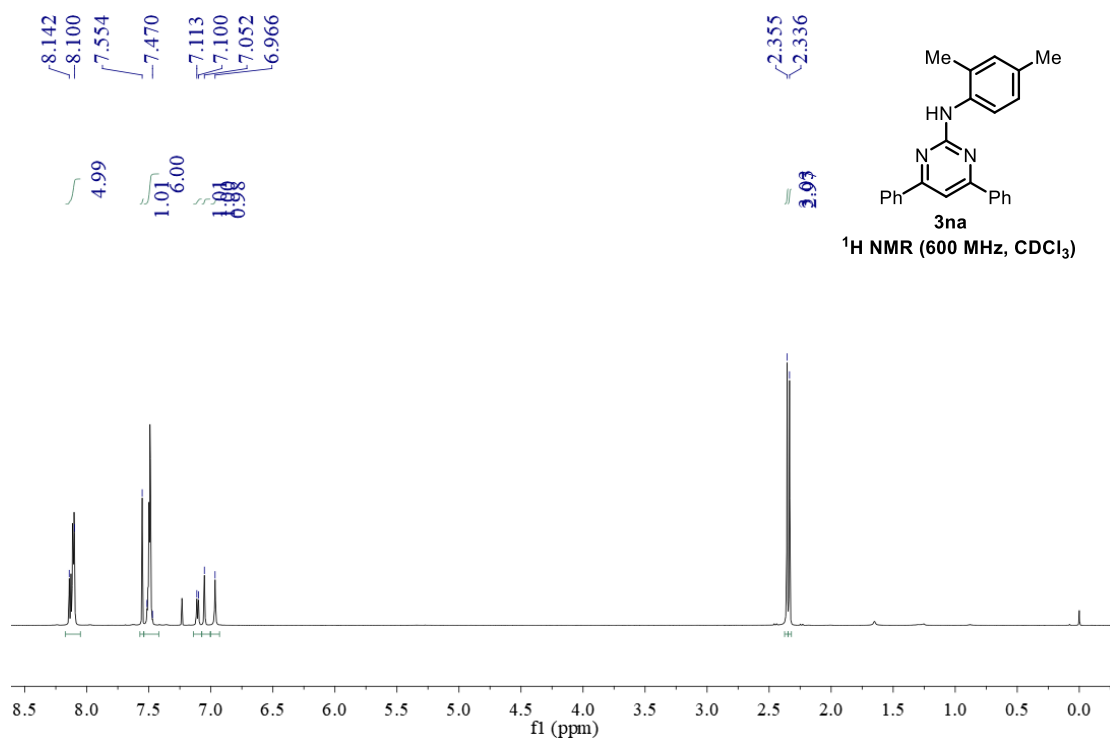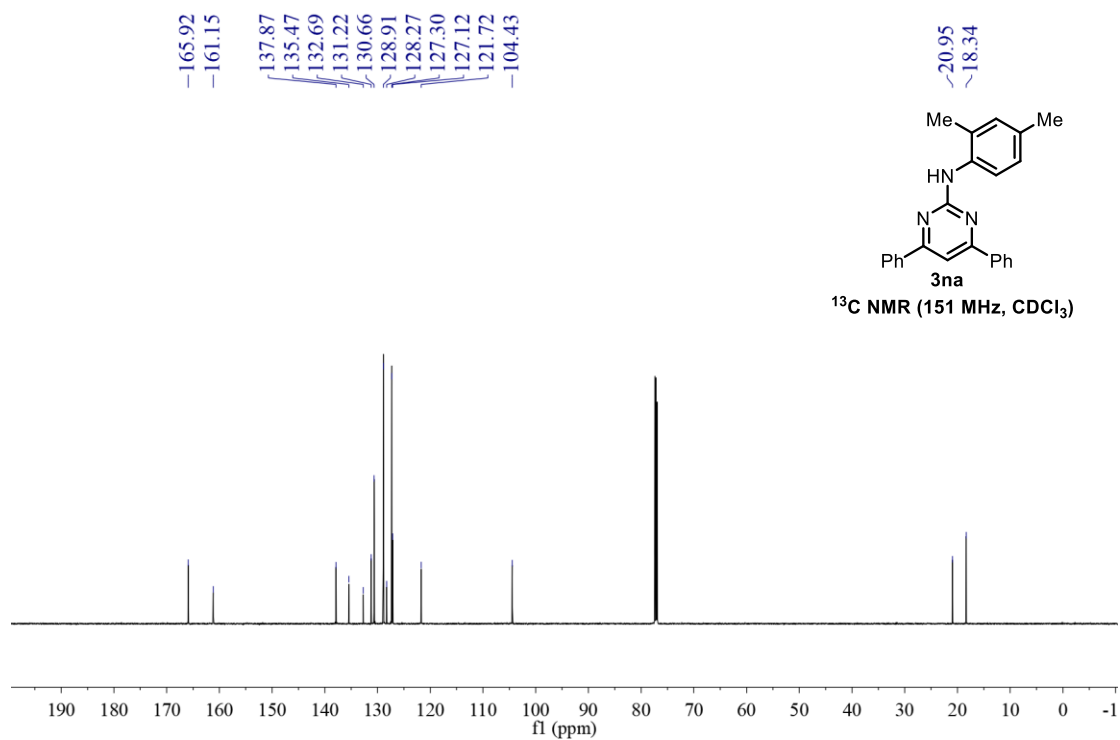



8.499  
8.496  
8.177  
8.162  
7.817  
7.777  
7.683  
7.665  
7.617  
7.551  
7.503  
7.469  
7.444  
7.372  
7.348

1.00  
4.00  
3.02  
1.00  
1.00

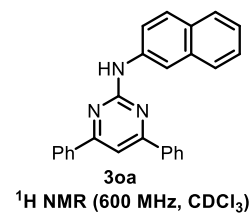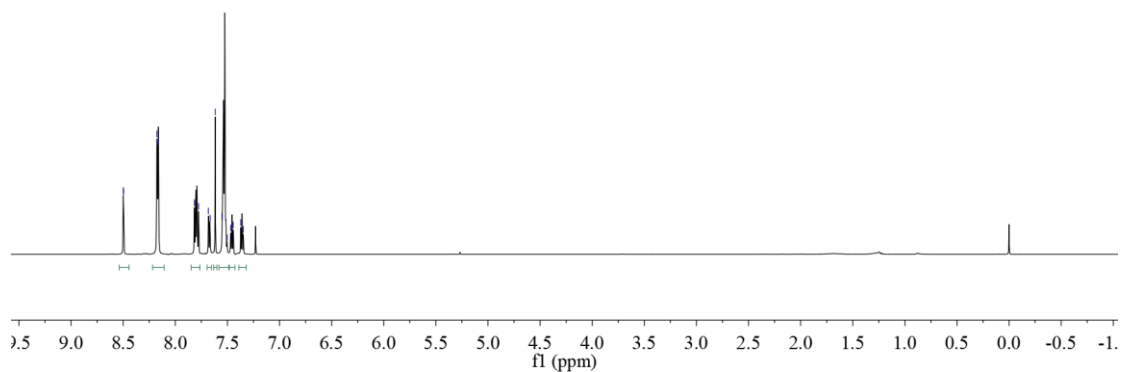

165.97  
160.60  
137.74  
137.62  
134.42  
130.84  
129.82  
129.01  
128.60  
127.71  
127.48  
127.35  
126.44  
124.19  
120.45  
114.83  
104.99

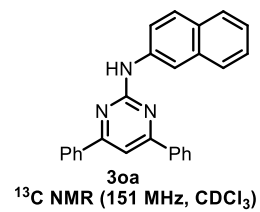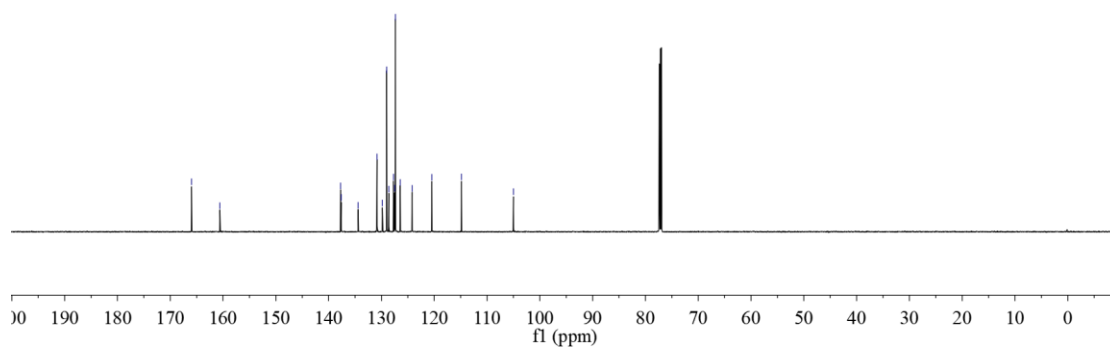

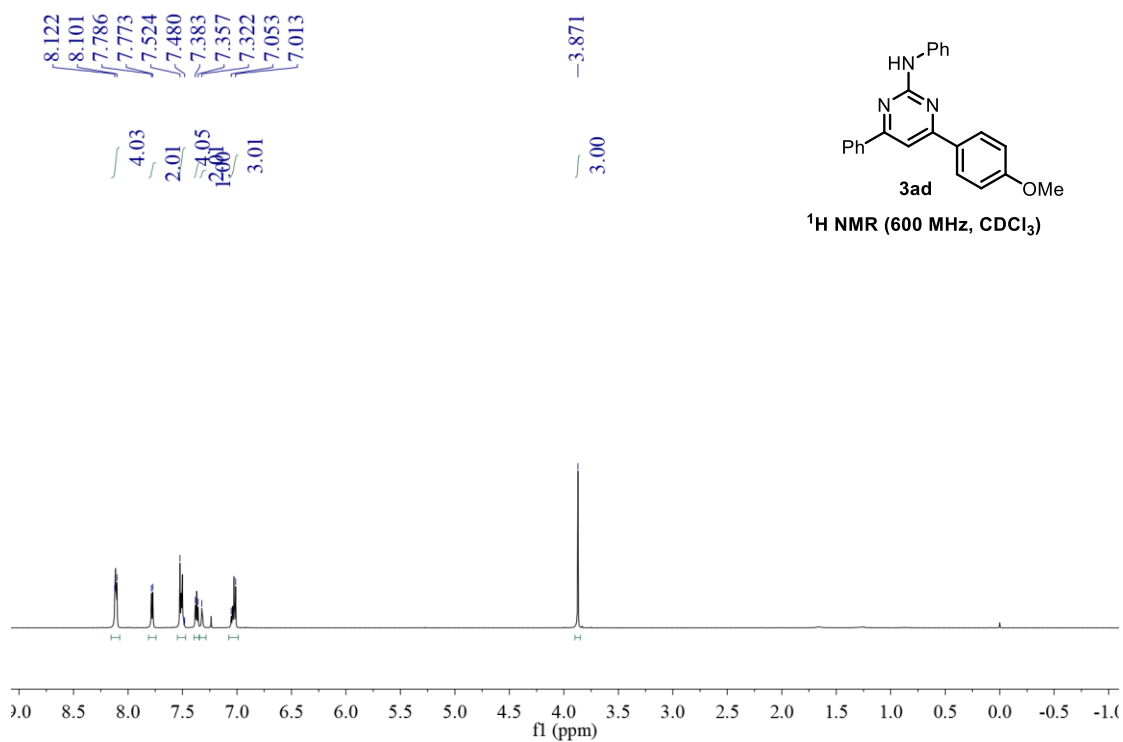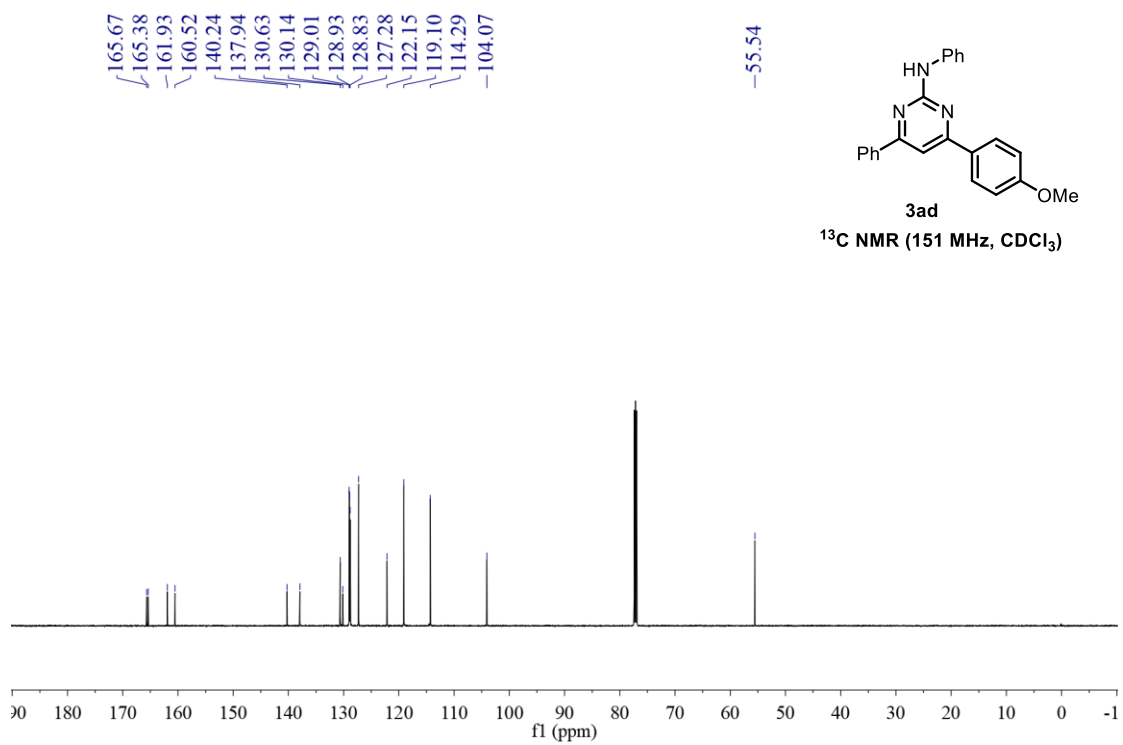

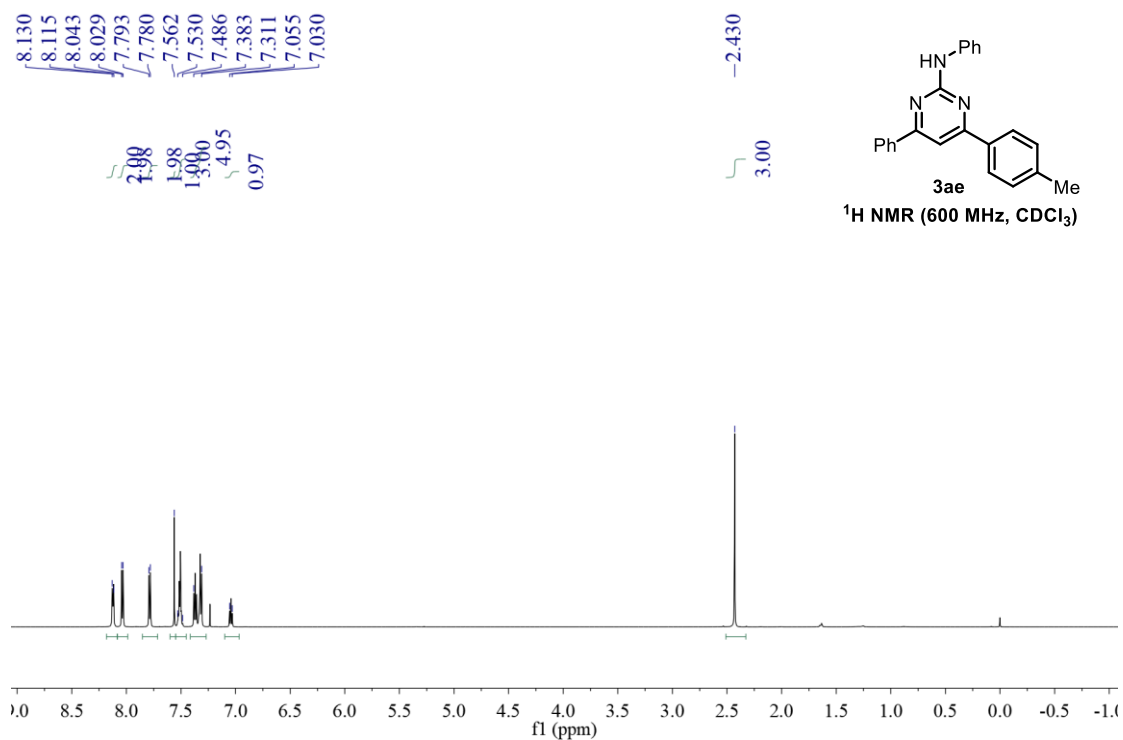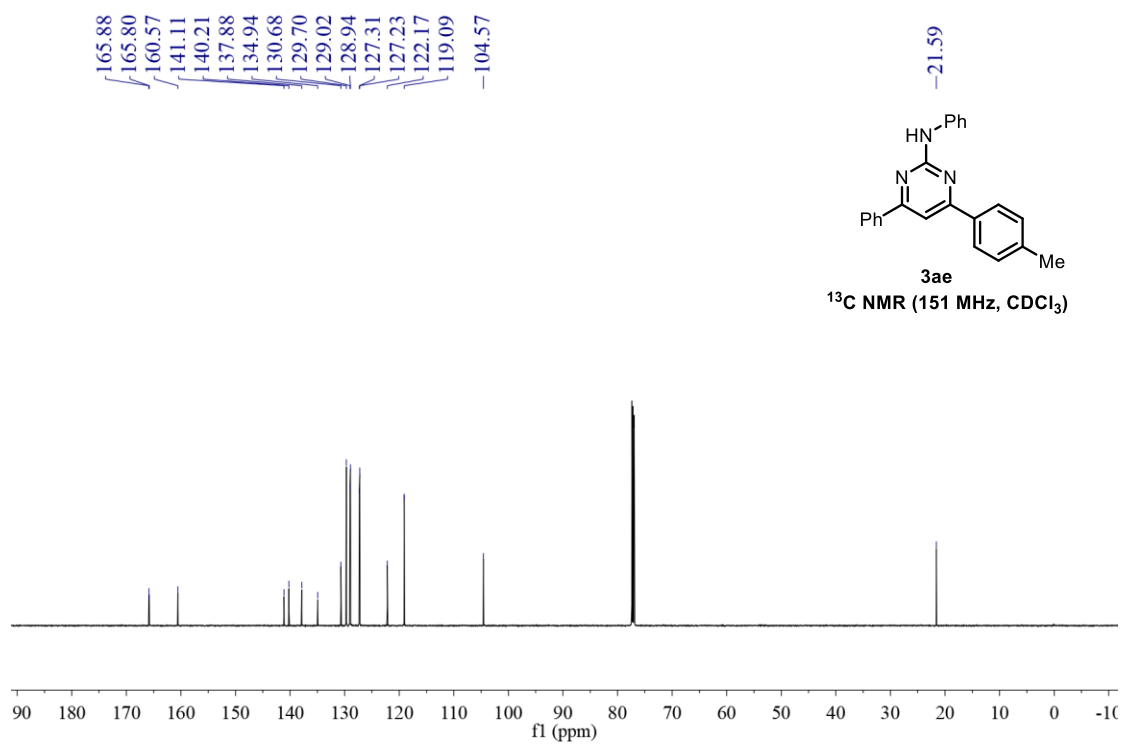

8.142  
8.110  
7.773  
7.759  
7.527  
7.512  
7.392  
7.366  
7.323  
7.314  
7.208  
7.180  
7.072  
7.048

4.00  
2.00  
1.02  
1.96  
1.00

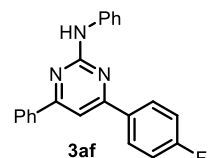

<sup>1</sup>H NMR (600 MHz, CDCl<sub>3</sub>)

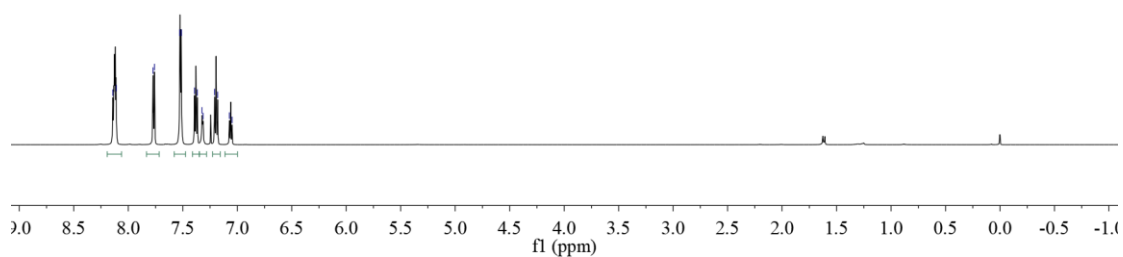

166.08  
165.43  
164.78  
163.77  
160.56  
140.02  
137.67  
133.88  
133.86  
130.85  
129.35  
129.29  
129.06  
128.99  
127.31  
122.39  
119.20  
116.04  
115.90  
104.45

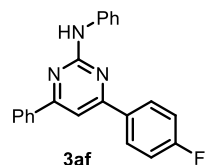

<sup>13</sup>C NMR (151 MHz, CDCl<sub>3</sub>)

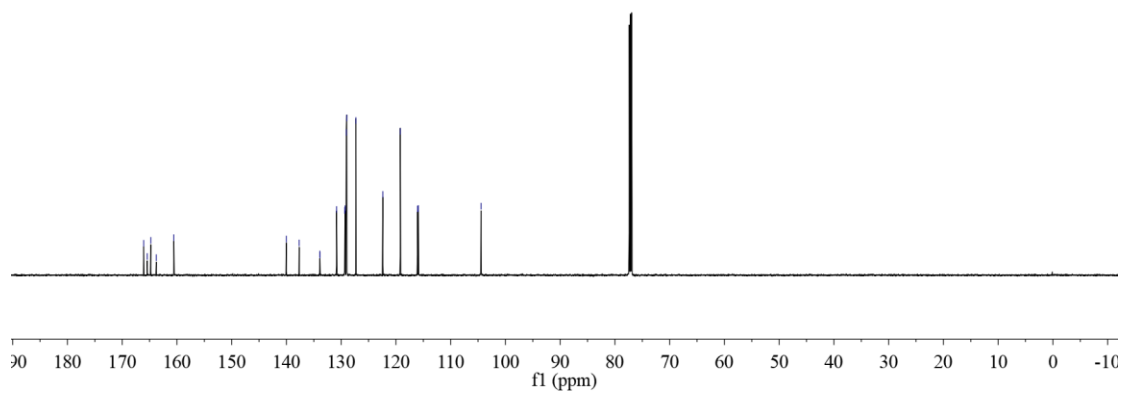

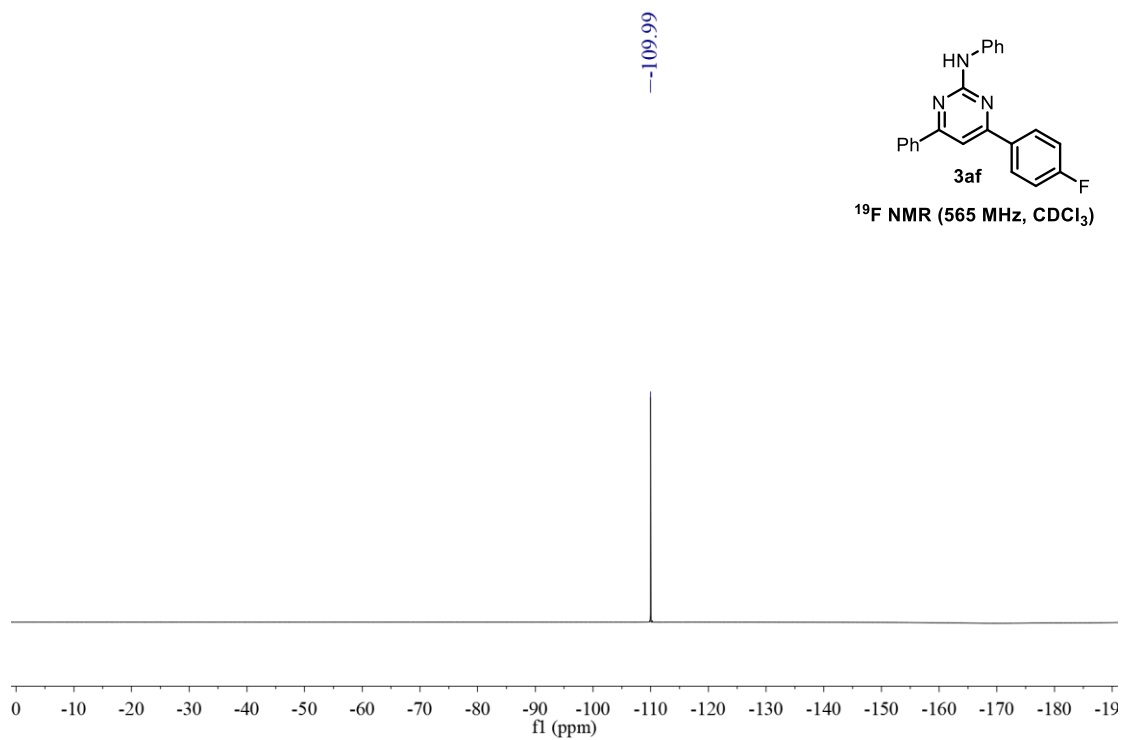

8.115  
8.093  
8.065  
8.051  
7.759  
7.745  
7.530  
7.500  
7.479  
7.465  
7.386  
7.359  
7.315  
7.070  
7.045

2.00  
2.01  
1.01  
0.98  
0.99

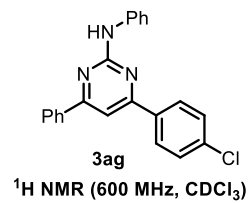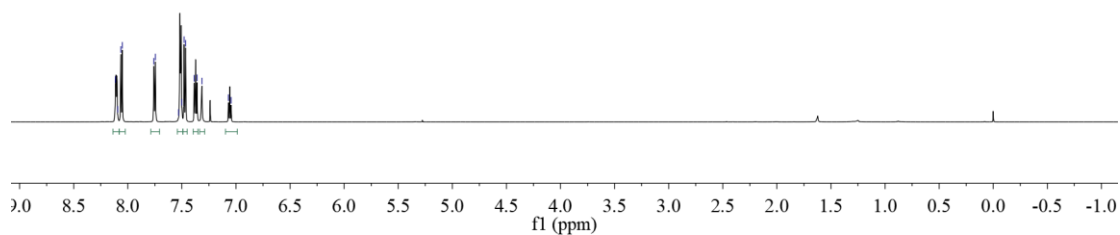

166.17  
164.62  
160.56  
139.97  
137.58  
136.91  
136.15  
130.89  
129.18  
129.06  
128.99  
128.59  
127.31  
122.42  
119.19  
-104.50

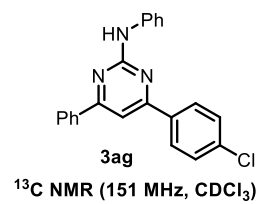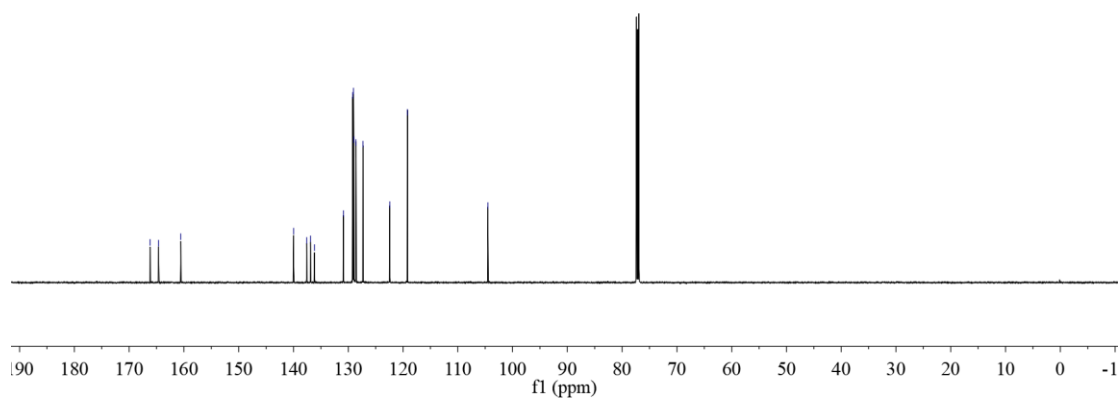

8.117  
8.101  
8.004  
7.982  
7.762  
7.750  
7.647  
7.625  
7.526  
7.509  
7.389  
7.362  
7.309  
7.072  
7.048

2.88  
2.88  
2.88  
2.88  
1.00  
0.99

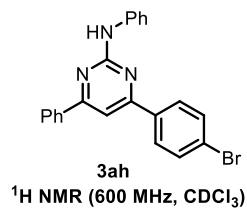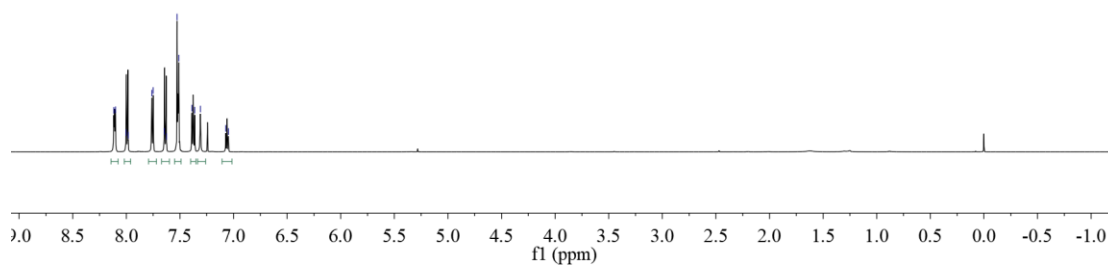

166.22  
164.70  
160.58  
139.96  
137.58  
136.62  
132.15  
130.90  
129.06  
129.00  
128.83  
127.32  
125.34  
122.44  
119.20  
-104.48

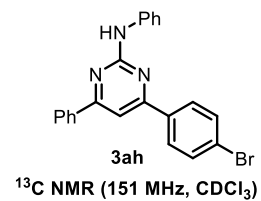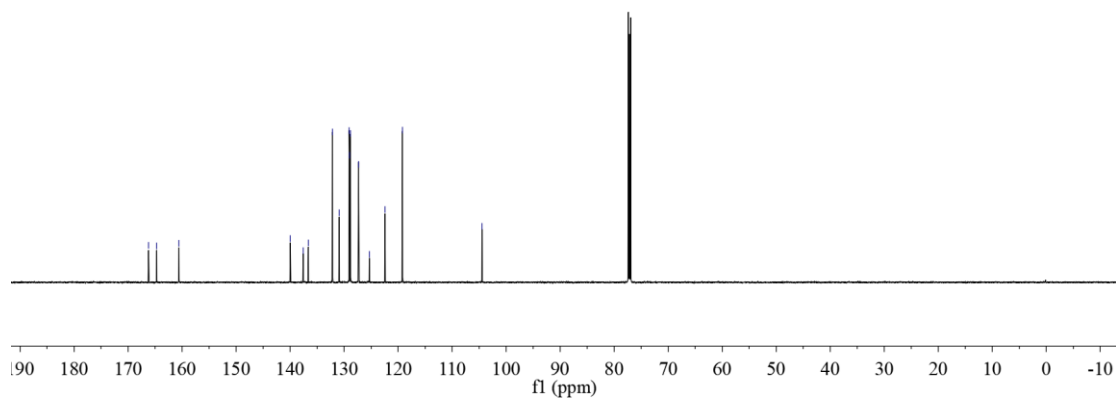

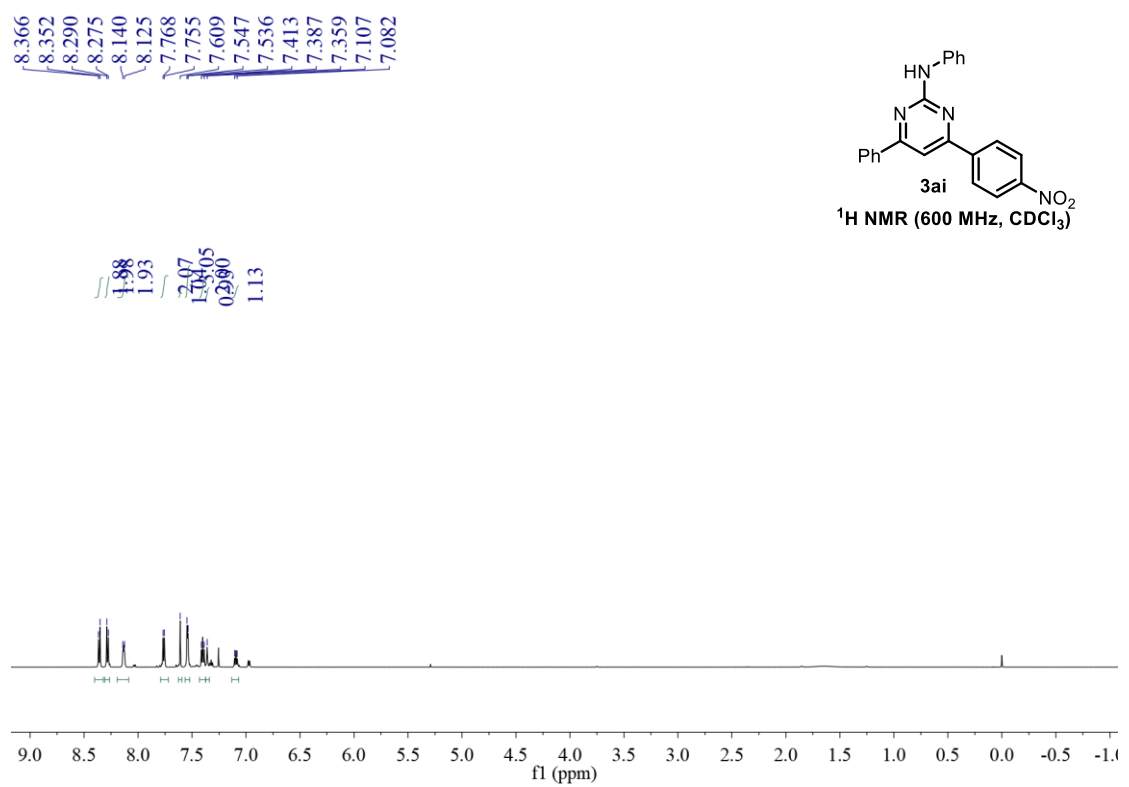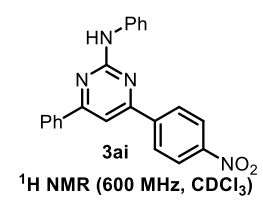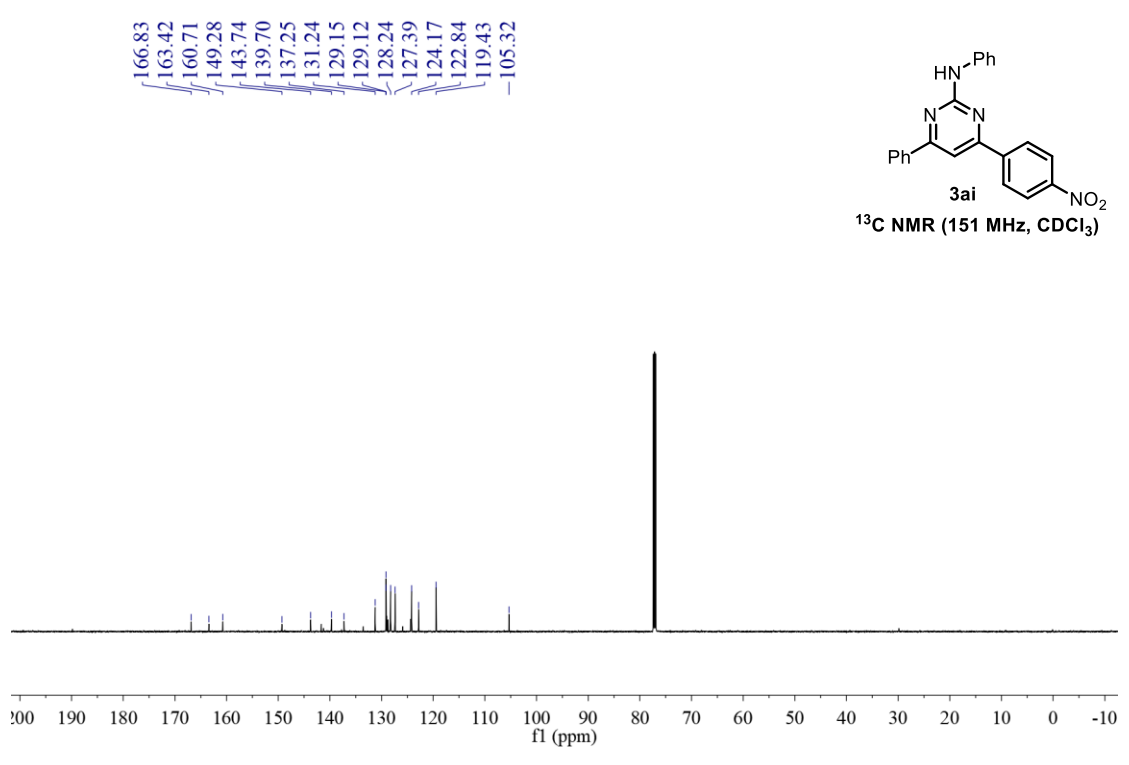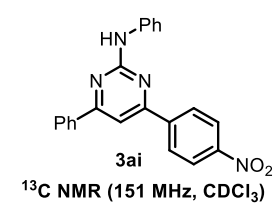



8.230  
8.216  
8.127  
8.121  
7.808  
7.748  
7.576  
7.540  
7.531  
7.407  
7.394  
7.381  
7.342  
7.100  
7.075

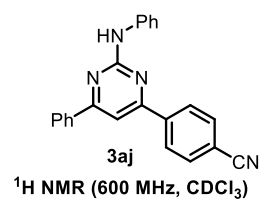

2.82  
4.01  
1.99  
1.60  
1.00

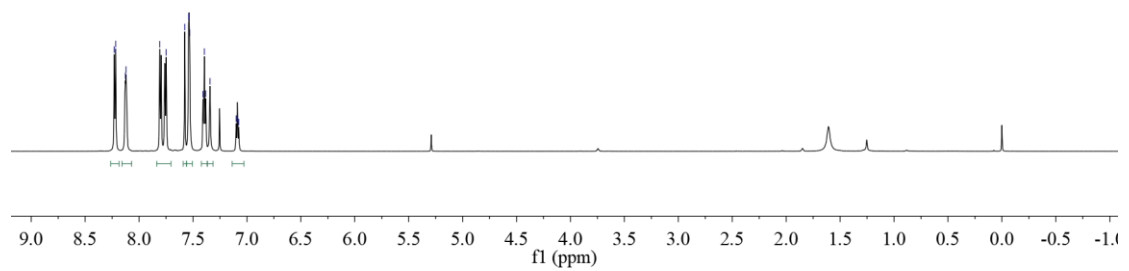

166.73  
163.76  
160.70  
141.99  
139.74  
137.30  
132.76  
131.18  
129.13  
129.10  
127.89  
127.36  
122.77  
119.39  
118.65  
114.14  
105.09

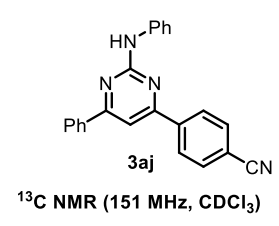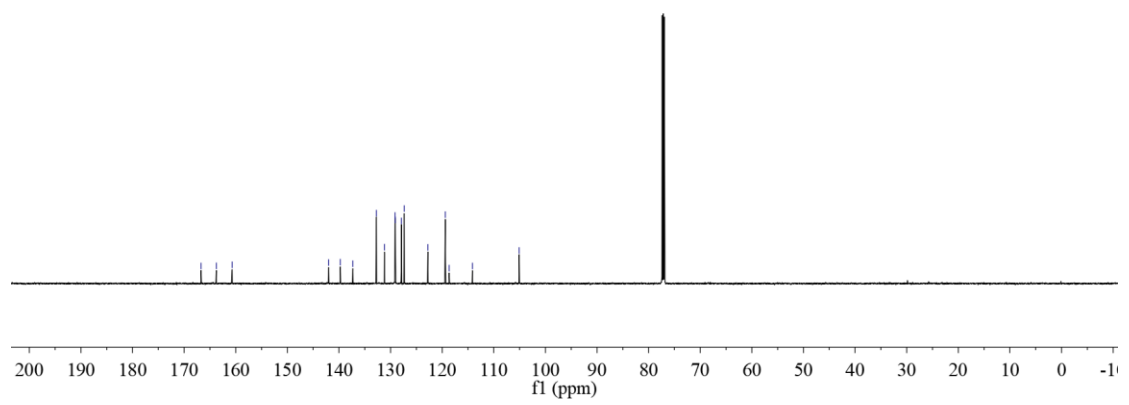

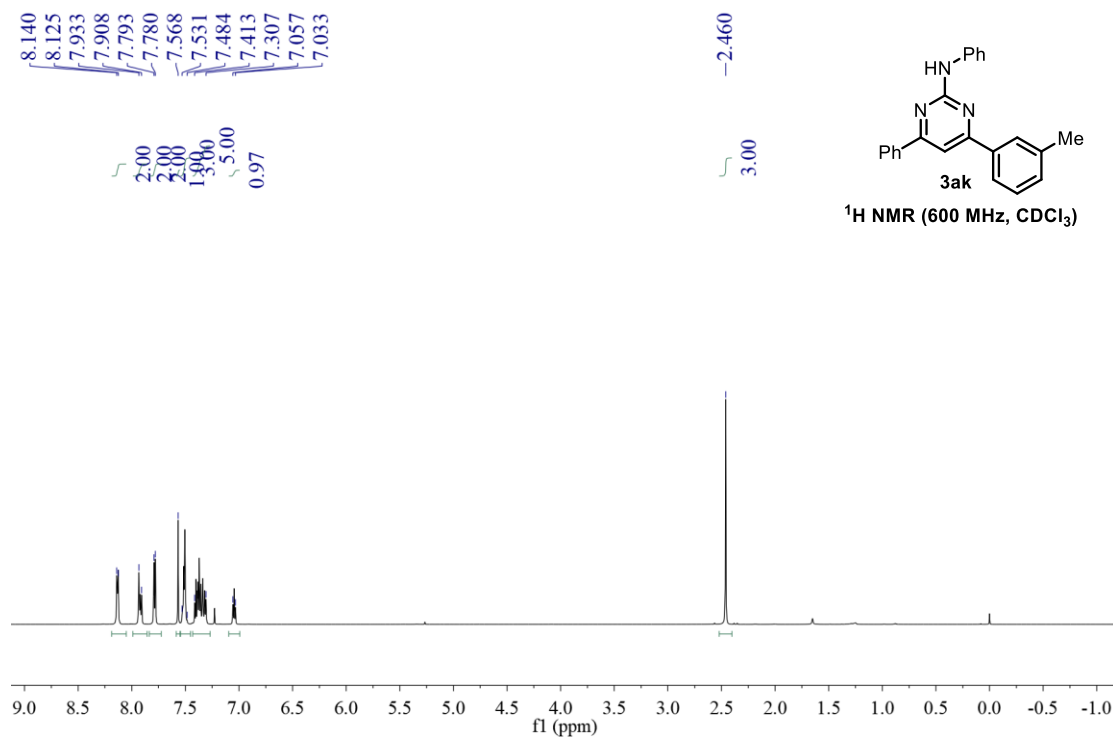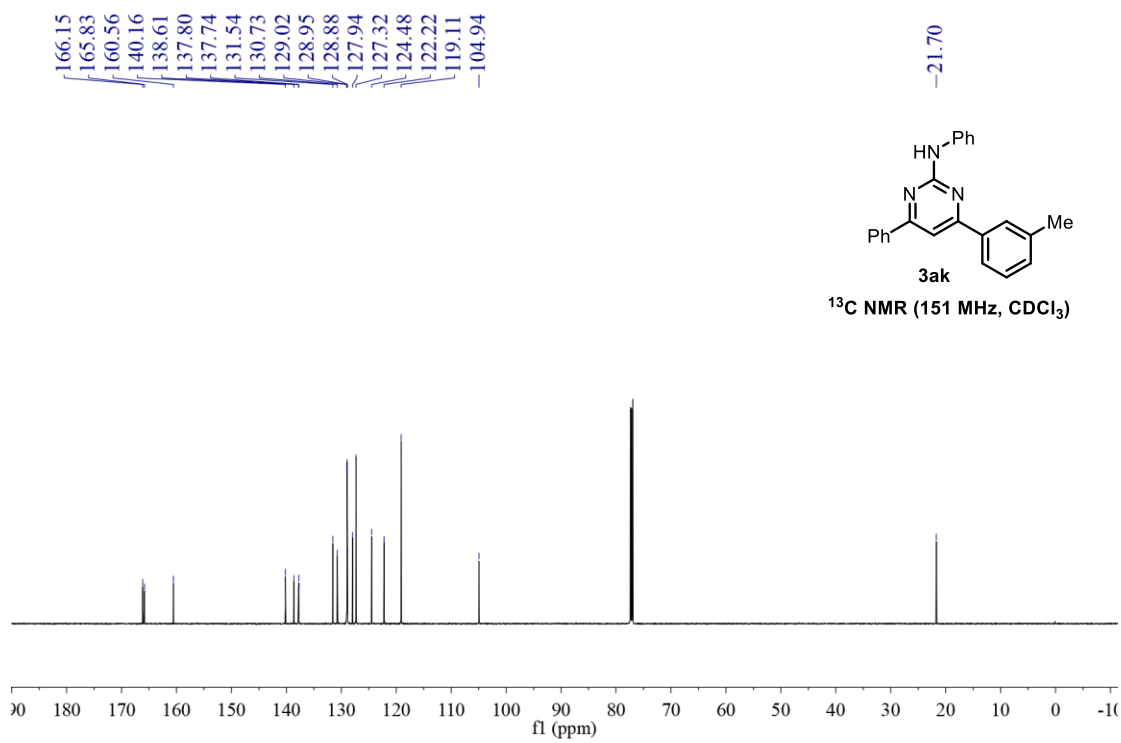

8.126  
8.110  
7.894  
7.881  
7.856  
7.839  
7.769  
7.756  
7.537  
7.511  
7.487  
7.450  
7.394  
7.368  
7.329  
7.207  
7.176  
7.074  
7.050

2.00  
0.99  
2.00  
1.04  
1.04  
0.99  
1.00

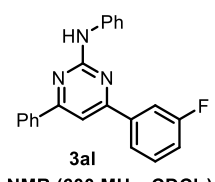

<sup>1</sup>H NMR (600 MHz, CDCl<sub>3</sub>)

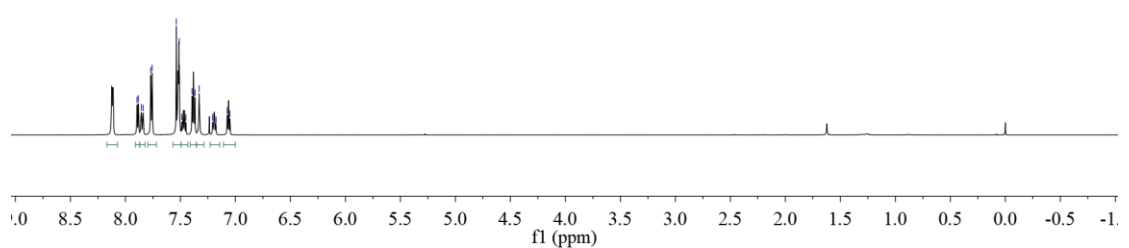

166.27  
164.54  
164.53  
164.18  
162.54  
160.58  
140.13  
140.08  
139.94  
137.54  
130.93  
130.49  
130.44  
129.08  
129.01  
127.33  
122.87  
122.86  
122.46  
119.23  
117.68  
117.54  
114.36  
114.21  
104.80

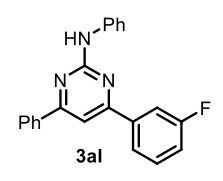

<sup>13</sup>C NMR (151 MHz, CDCl<sub>3</sub>)

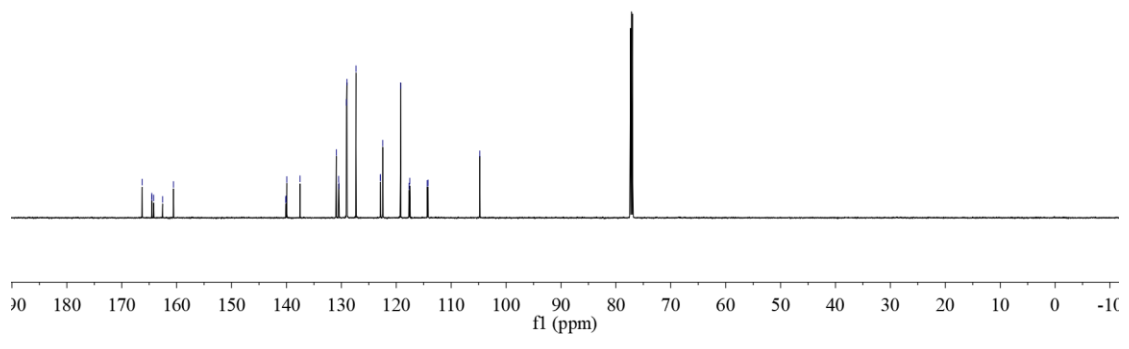

--112.30

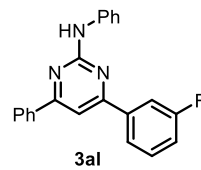

<sup>19</sup>F NMR (565 MHz, CDCl<sub>3</sub>)

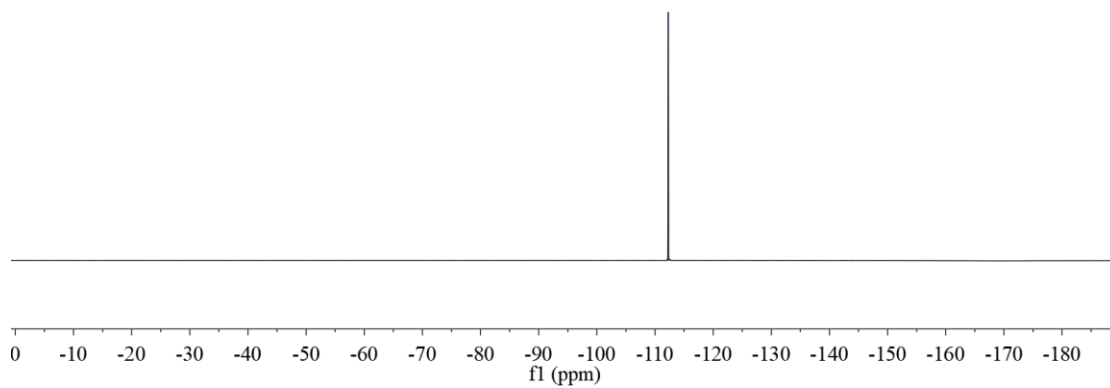

8.138  
8.117  
8.006  
7.988  
7.781  
7.761  
7.537  
7.514  
7.486  
7.341  
7.087  
7.050

1.09  
1.01  
2.00  
4.01  
5.01  
0.99

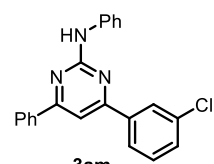

<sup>1</sup>H NMR (400 MHz, CDCl<sub>3</sub>)

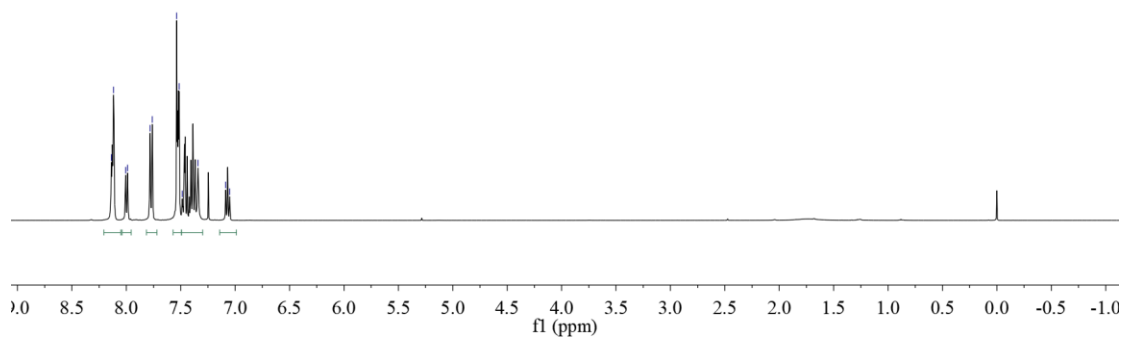

166.26  
164.45  
160.51  
139.89  
139.54  
137.46  
135.09  
130.98  
130.72  
130.22  
129.08  
129.03  
127.49  
127.35  
125.39  
122.51  
119.25  
104.76

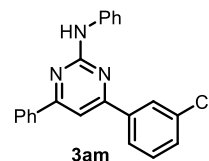

<sup>13</sup>C NMR (100 MHz, CDCl<sub>3</sub>)

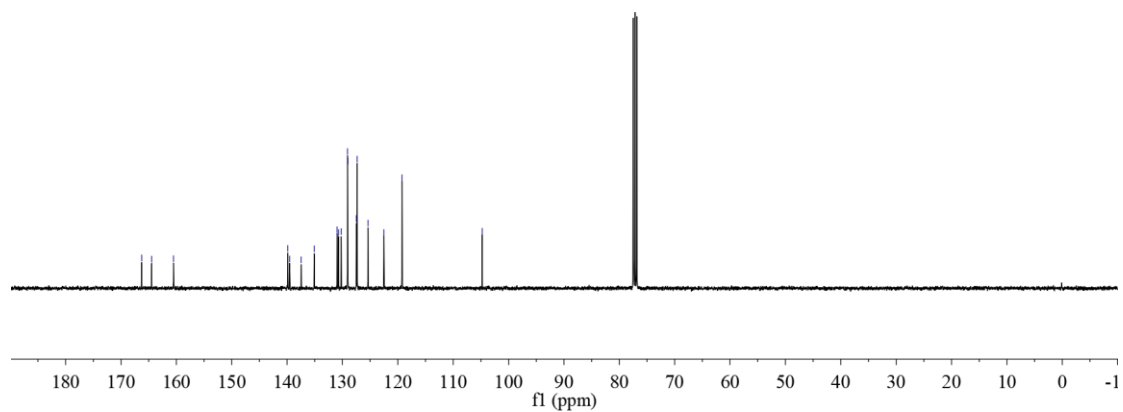

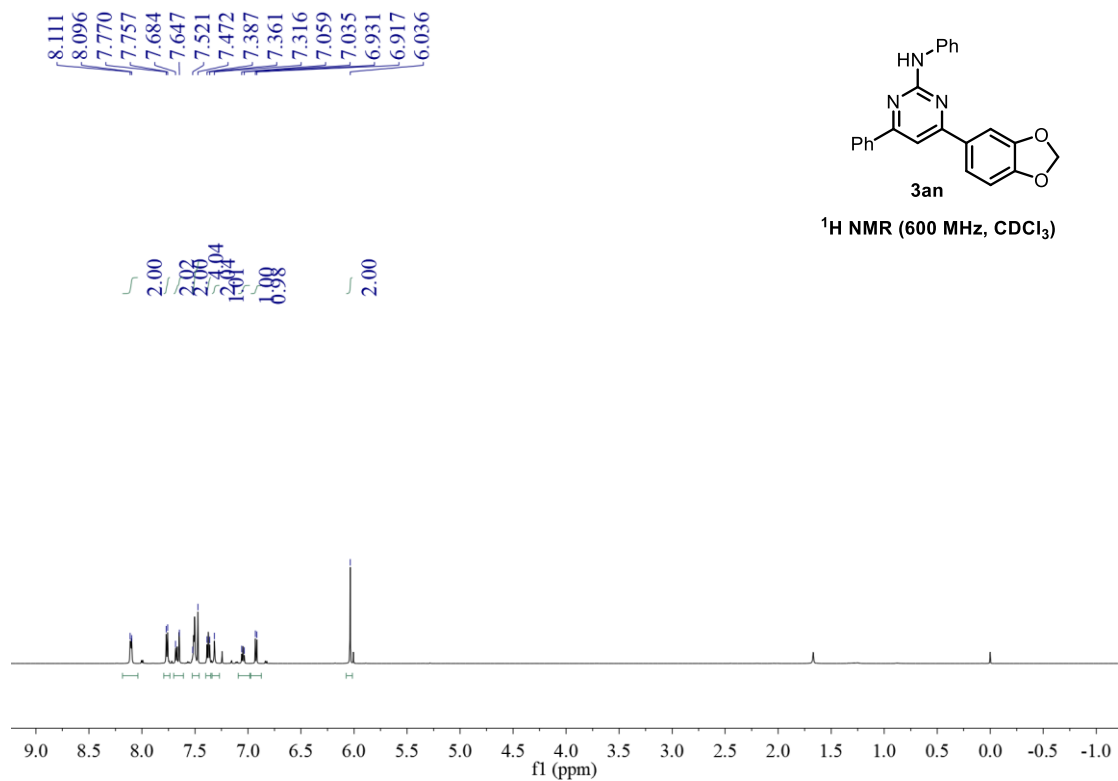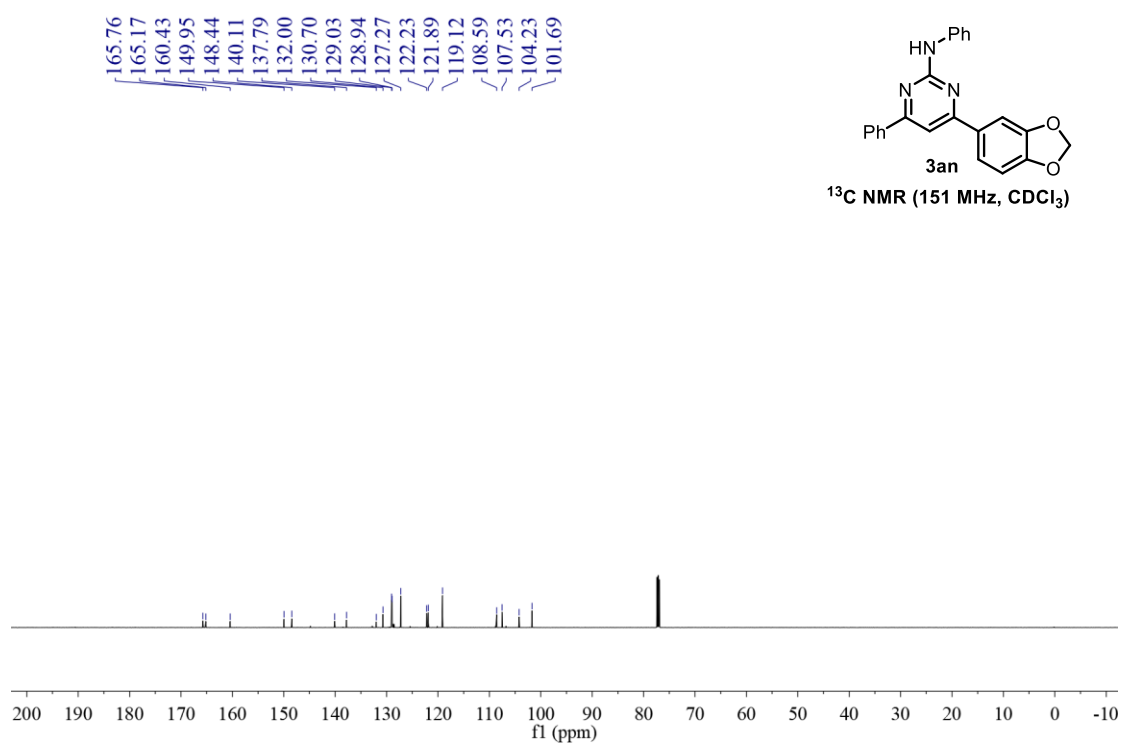

8.615  
8.230  
8.216  
8.168  
8.158  
7.981  
7.956  
7.893  
7.878  
7.827  
7.813  
7.708  
7.548  
7.524  
7.408  
7.378  
7.079  
7.055

1.01  
1.07  
1.00  
1.01  
1.01  
3.01  
1.00

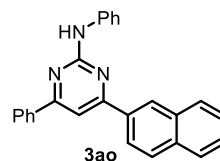

<sup>1</sup>H NMR (600 MHz, CDCl<sub>3</sub>)

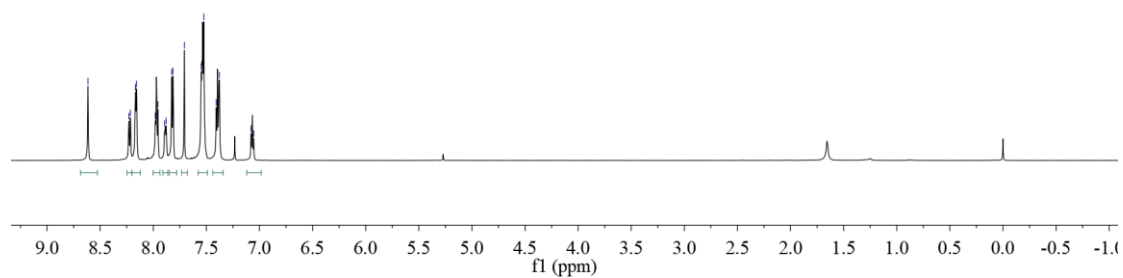

166.02  
165.86  
160.66  
140.19  
137.85  
135.09  
134.71  
133.41  
130.80  
129.14  
129.07  
129.00  
128.72  
127.91  
127.45  
127.39  
126.68  
124.38  
122.33  
119.23  
105.11

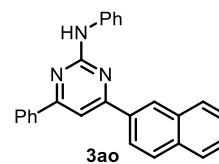

<sup>13</sup>C NMR (151 MHz, CDCl<sub>3</sub>)

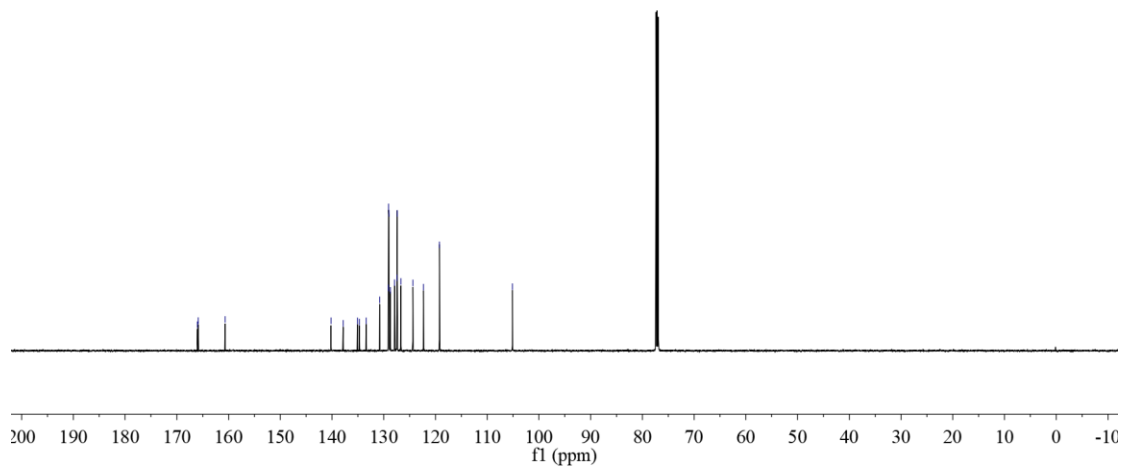

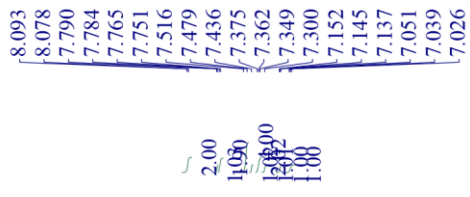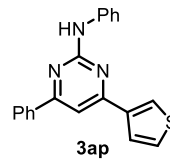

**<sup>1</sup>H NMR (600 MHz, CDCl<sub>3</sub>)**

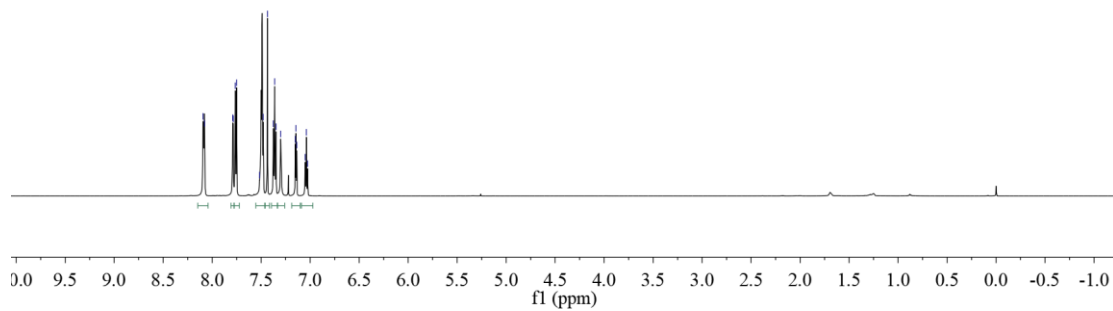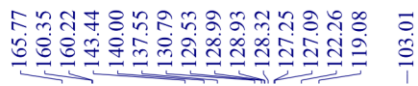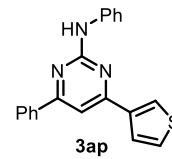

**<sup>13</sup>C NMR (151 MHz, CDCl<sub>3</sub>)**

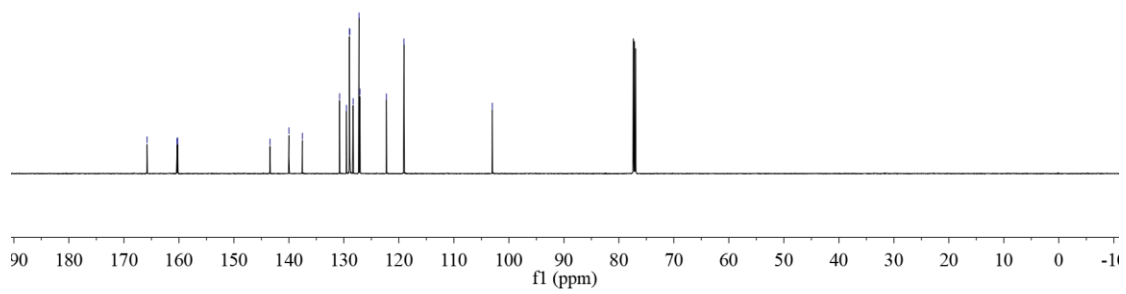



8.136  
8.121  
7.768  
7.755  
7.605  
7.531  
7.502  
7.381  
7.355  
7.331  
7.323  
7.260  
7.254  
7.059  
7.034  
6.587  
6.579

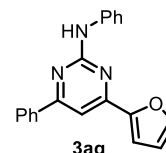

<sup>1</sup>H NMR (600 MHz, CDCl<sub>3</sub>)

2.00  
2.00  
1.01  
1.01  
0.98  
0.97

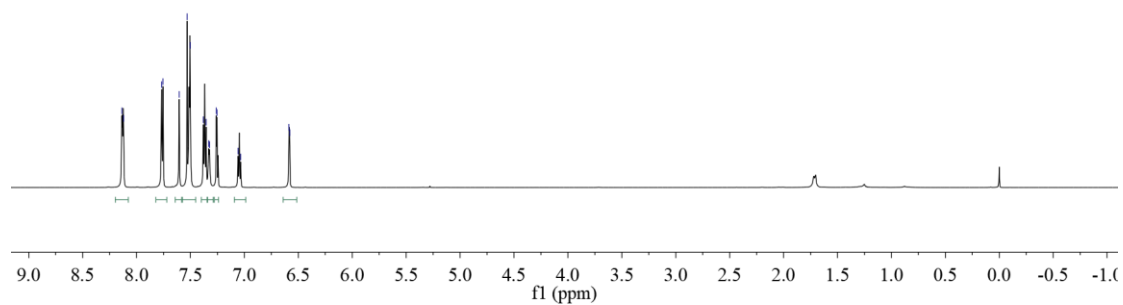

165.84  
160.31  
156.90  
152.52  
144.77  
140.05  
137.50  
130.85  
129.01  
128.93  
127.28  
122.27  
119.08  
112.47  
111.98  
102.73

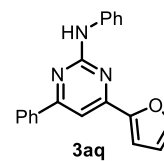

<sup>13</sup>C NMR (151 MHz, CDCl<sub>3</sub>)

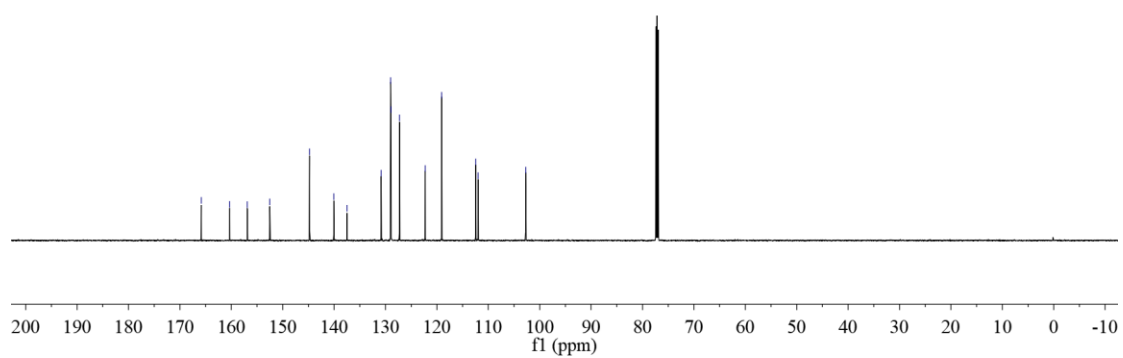

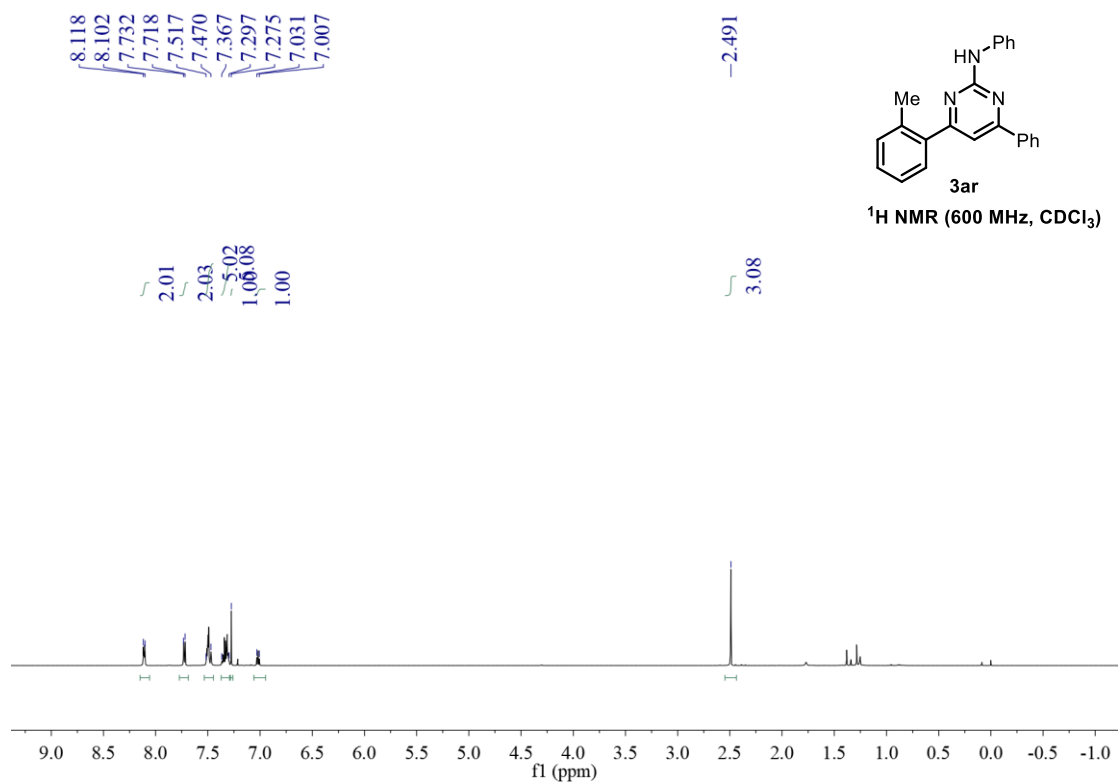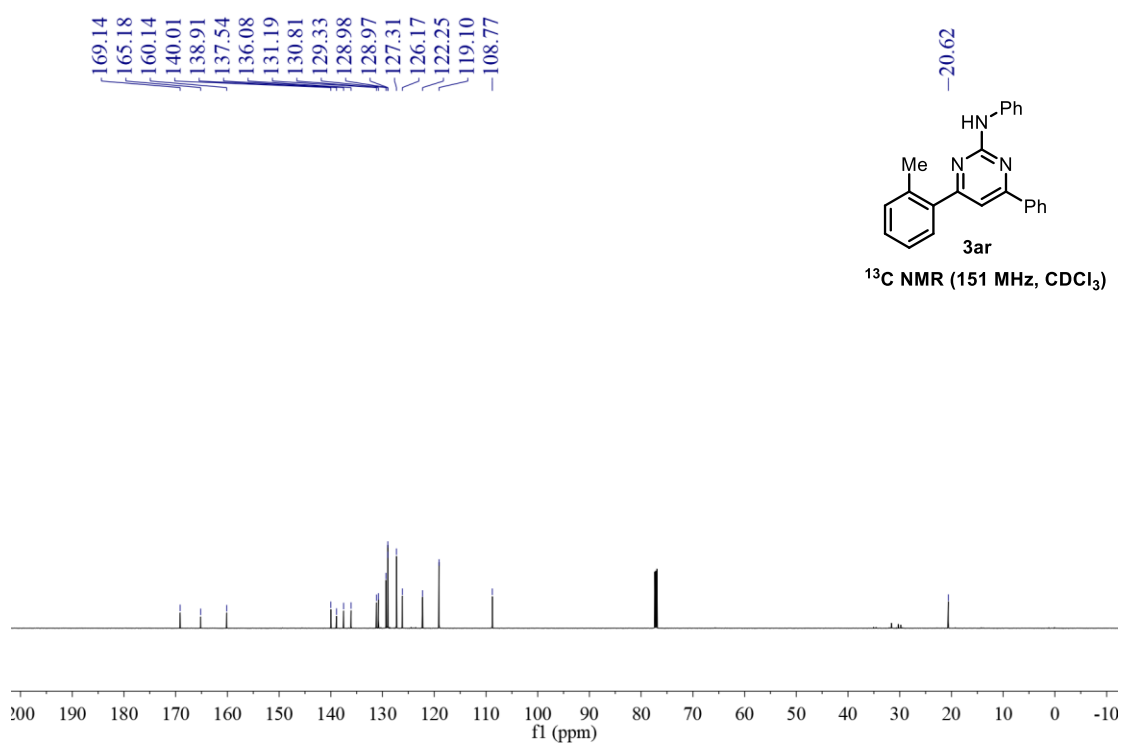

8.138  
8.122  
7.777  
7.764  
7.723  
7.710  
7.631  
7.616  
7.529  
7.512  
7.476  
7.436  
7.387  
7.346  
7.328  
7.299  
7.056  
7.044  
7.032

2.00  
0.80  
0.80  
1.00  
1.00  
1.00

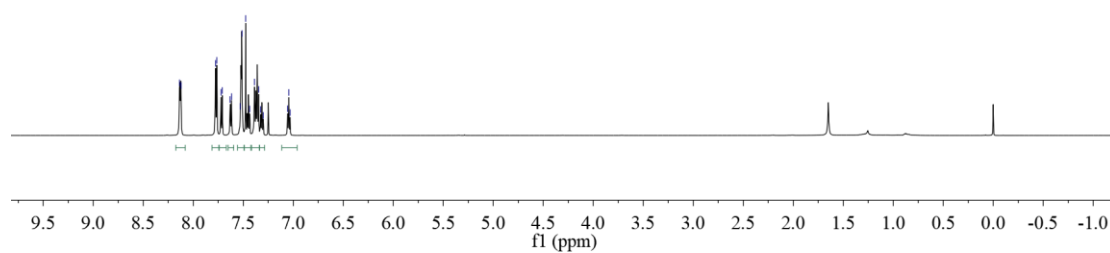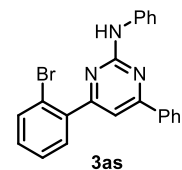

<sup>1</sup>H NMR (600 MHz, CDCl<sub>3</sub>)

167.24  
165.10  
160.28  
139.91  
139.85  
137.43  
133.78  
131.14  
130.94  
130.69  
129.06  
129.01  
127.81  
127.42  
122.40  
121.52  
119.10  
109.36

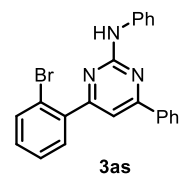

<sup>13</sup>C NMR (151 MHz, CDCl<sub>3</sub>)

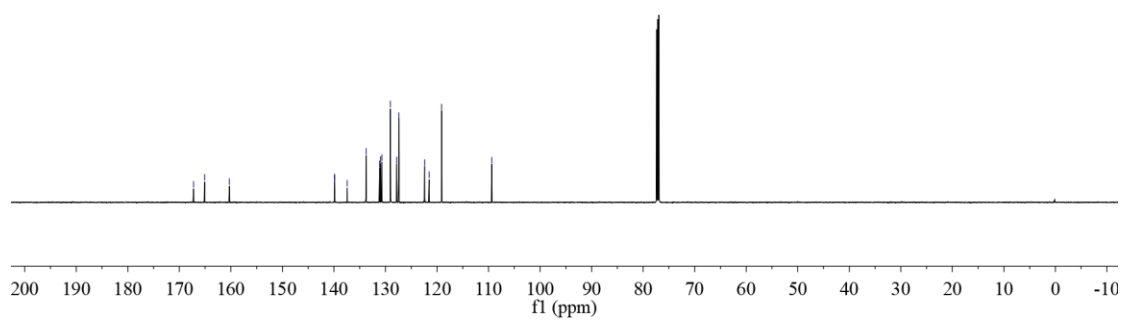

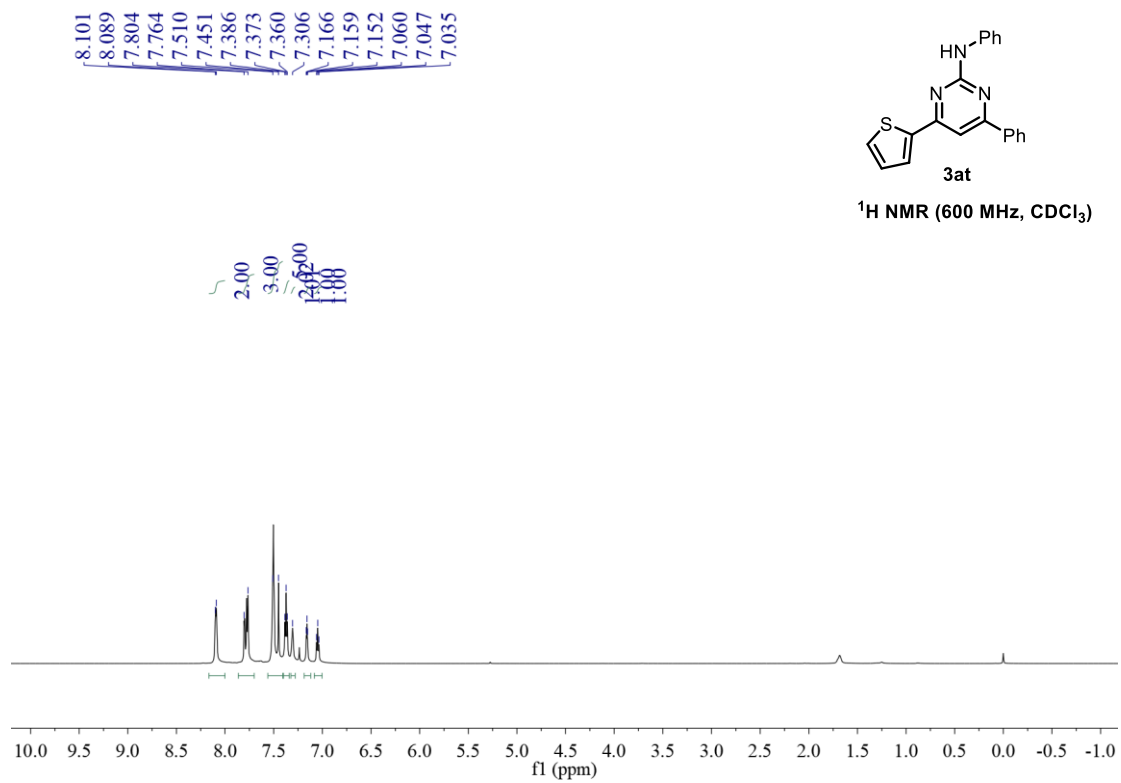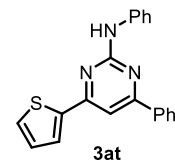

<sup>1</sup>H NMR (600 MHz, CDCl<sub>3</sub>)

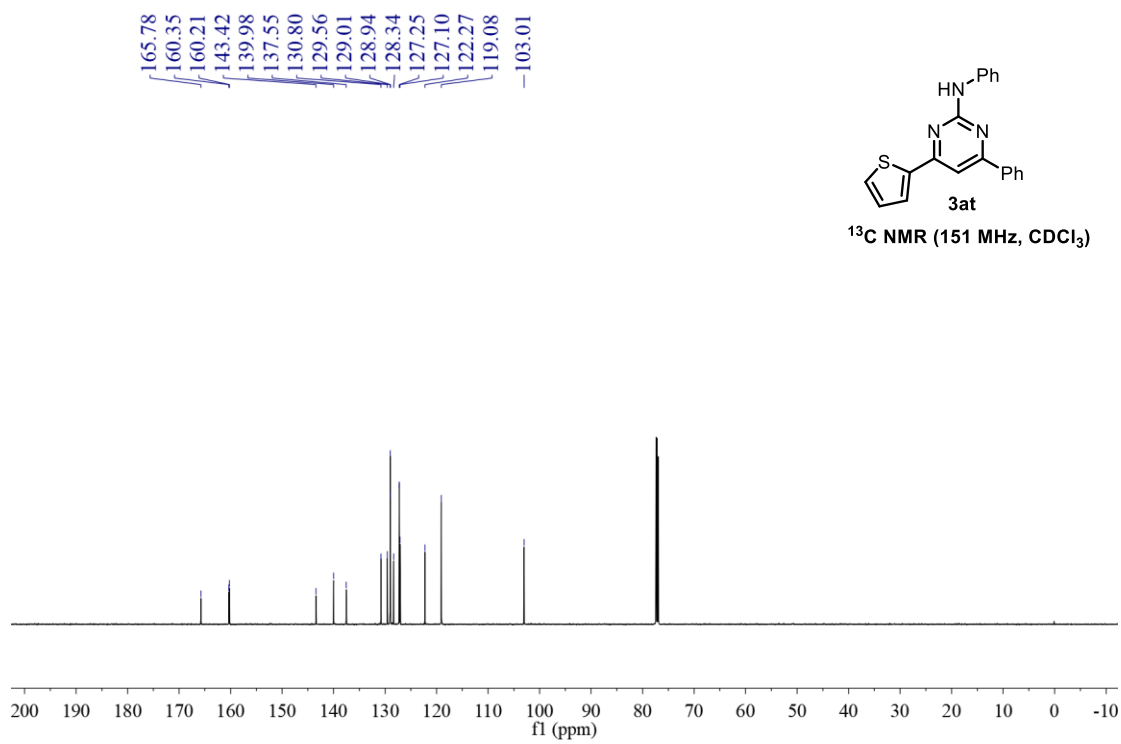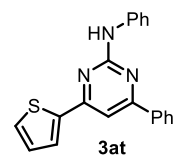

<sup>13</sup>C NMR (151 MHz, CDCl<sub>3</sub>)

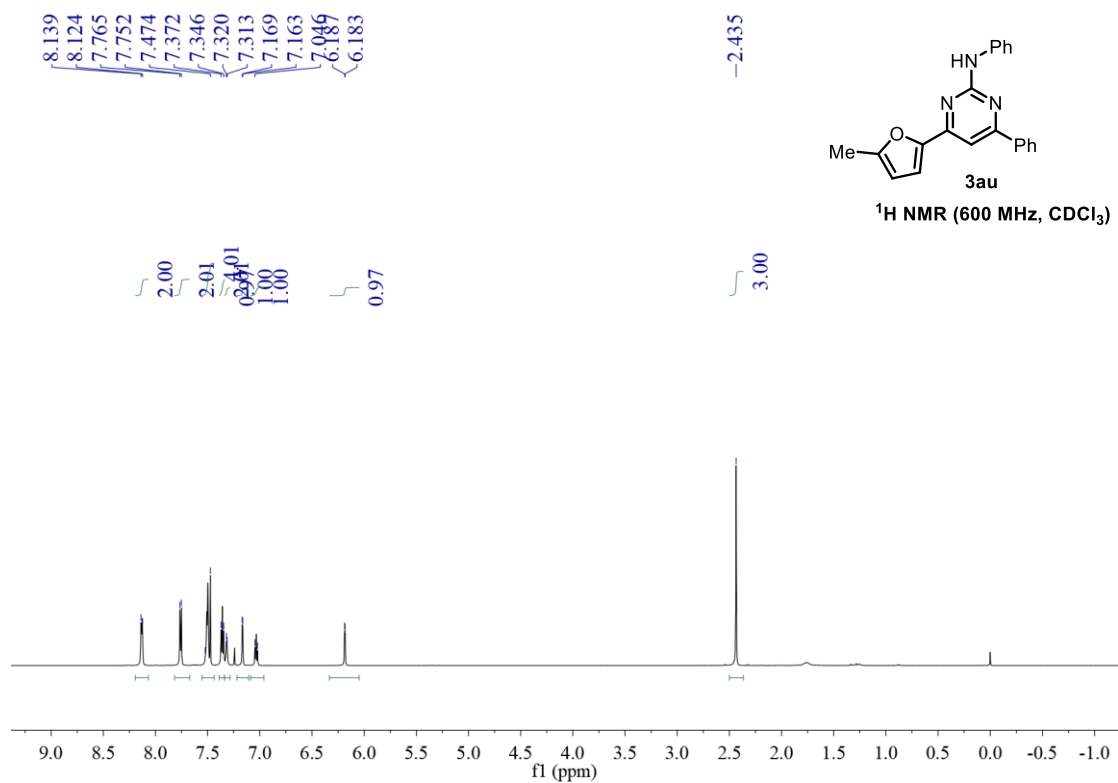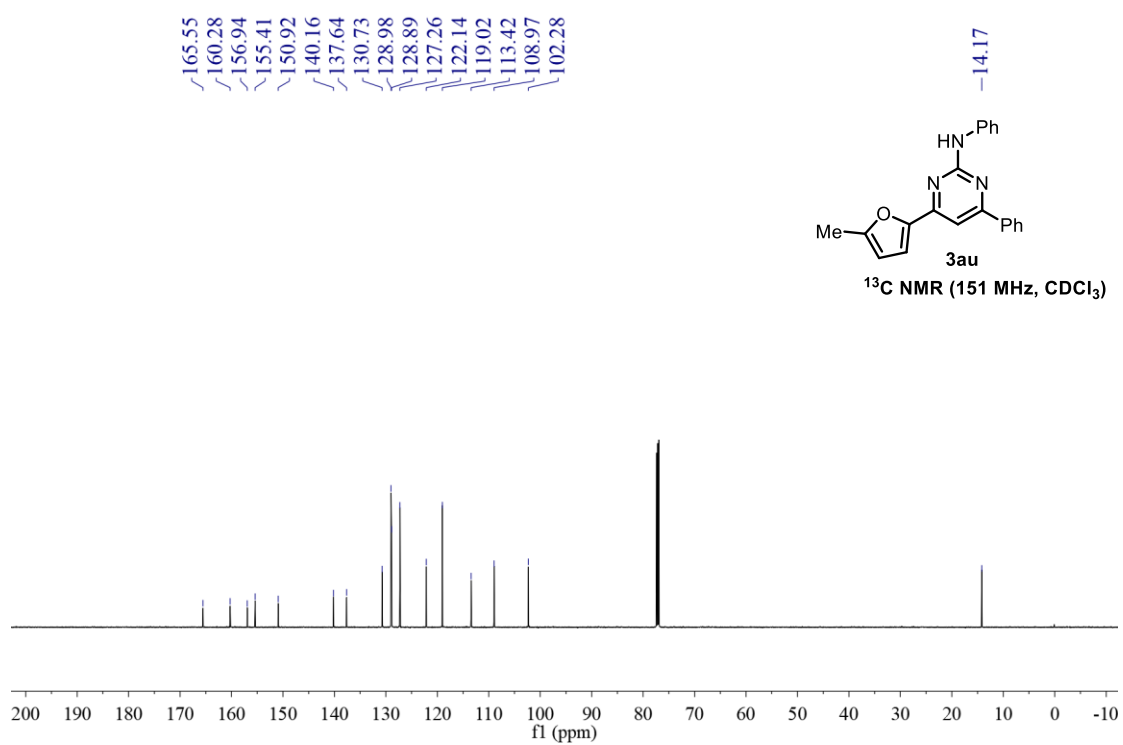

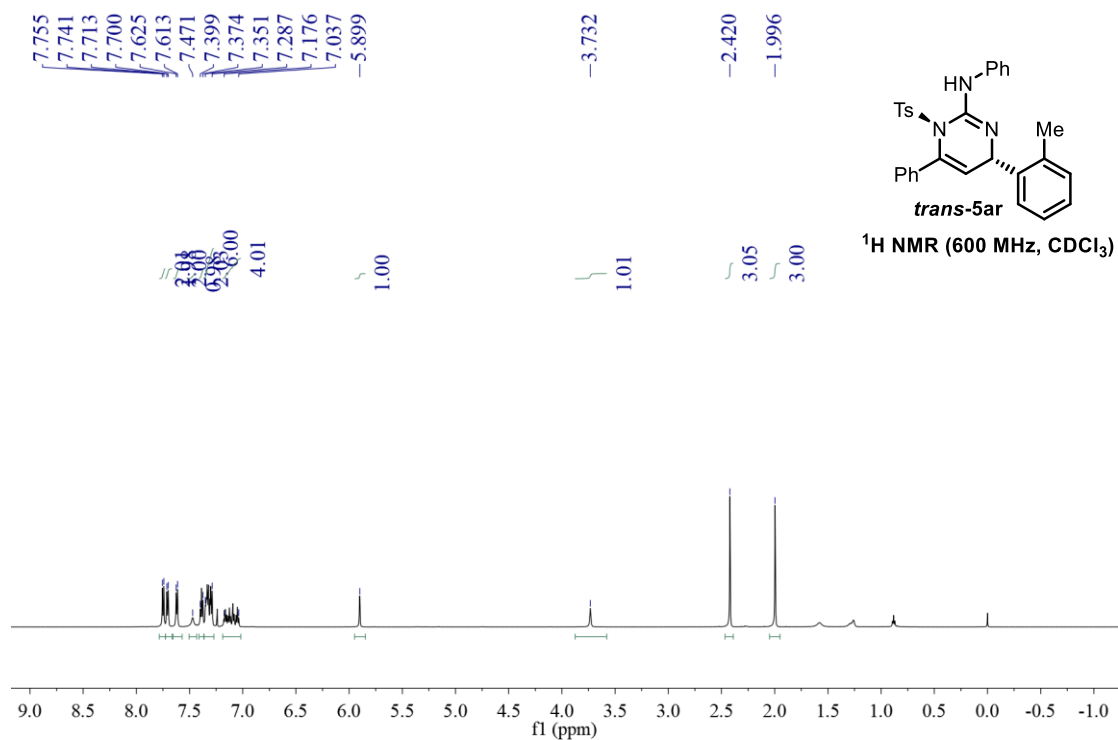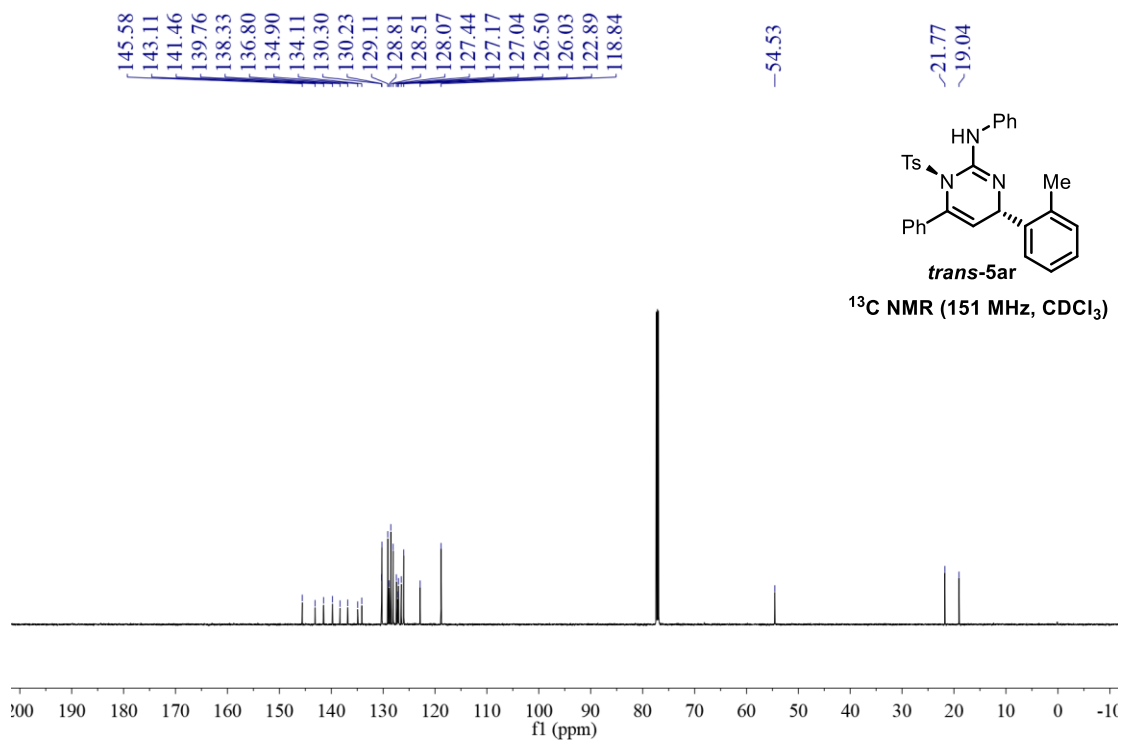

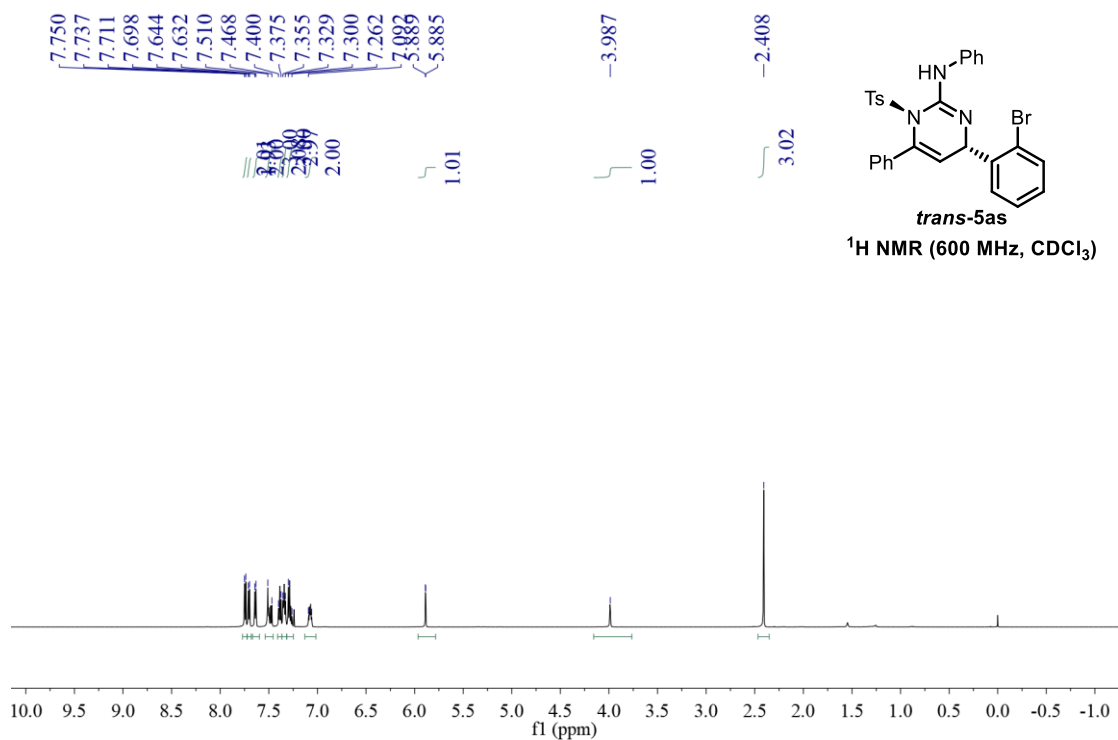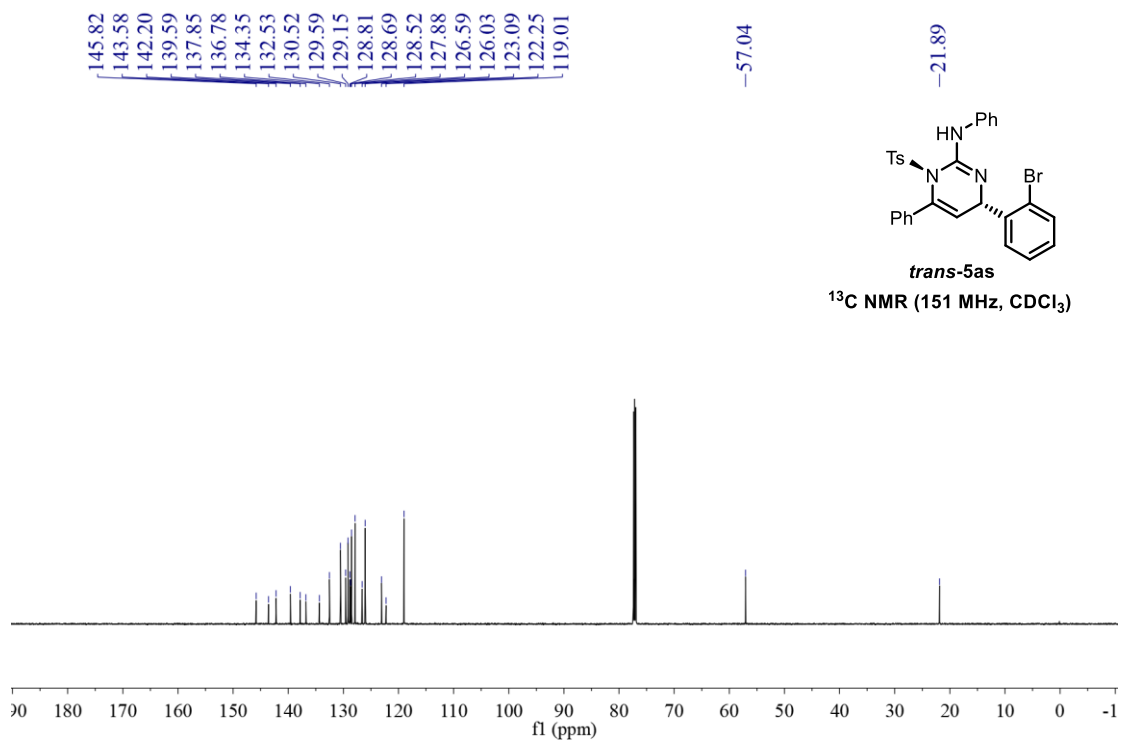

## 6. Single-Crystal X-Ray Diffraction Data

### 6.1 Single-Crystal X-Ray Diffraction Data of 3ea

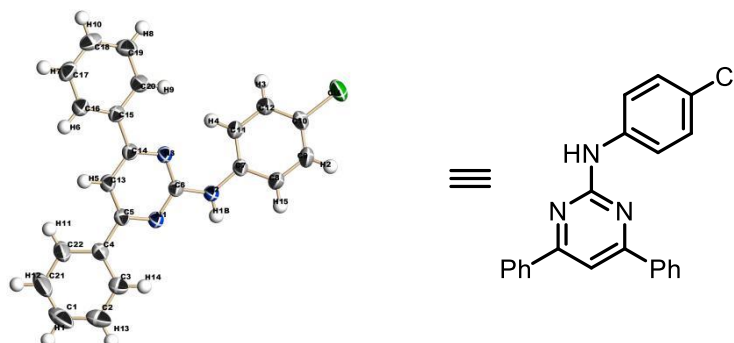

Figure S3. ORTEP drawing of **3ea** (CCDC 2282332) with 50% ellipsoid probability

|                                 |                                                                                                        |
|---------------------------------|--------------------------------------------------------------------------------------------------------|
| Identification code             | <b>3ea</b>                                                                                             |
| Chemical formula                | C <sub>22</sub> H <sub>16</sub> ClN <sub>3</sub>                                                       |
| Formula weight                  | 357.83 g/mol                                                                                           |
| Temperature                     | 301 K                                                                                                  |
| Wavelength                      | 0.71073 Å                                                                                              |
| Crystal system, space group     | Monoclinic, C 2/c                                                                                      |
| Unit cell dimensions            | a = 24.3817(8) Å      α = 90°<br>b = 8.4440(3) Å      β = 120.586(1)°<br>c = 19.9088(8) Å      γ = 90° |
| Volume                          | 3528.5(2) Å <sup>3</sup>                                                                               |
| Z                               | 8                                                                                                      |
| F(000)                          | 1488                                                                                                   |
| Theta range for data collection | 2.38 to 28.32°                                                                                         |
| Index ranges                    | -32 ≤ h ≤ 32, -11 ≤ k ≤ 11, -26 ≤ l ≤ 26                                                               |
| wR2(reflections)                | 0.1236(4405)                                                                                           |
| Absorption correction           | Multi-Scan                                                                                             |
| Diffractometer                  | d8 venture                                                                                             |
| Reflections collected           | 87504                                                                                                  |



## 6.2 Single-Crystal X-Ray Diffraction Data of *trans*-5as

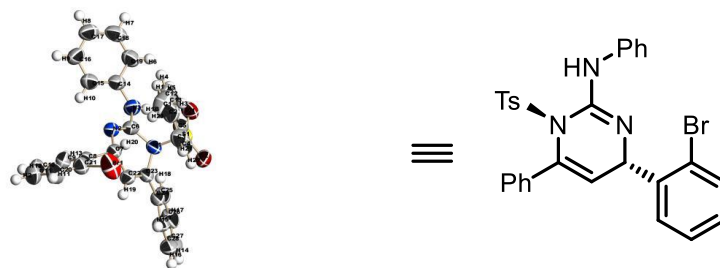

Figure S4. ORTEP drawing of *trans*-5as (CCDC 2282334) with 50% ellipsoid probability

|                                         |                                                                   |         |
|-----------------------------------------|-------------------------------------------------------------------|---------|
| <b>Identification code</b>              | <i>trans</i> -5as                                                 |         |
| <b>Chemical formula</b>                 | C <sub>29</sub> H <sub>24</sub> BrN <sub>3</sub> O <sub>2</sub> S |         |
| <b>Formula weight</b>                   | 558.48 g/mol                                                      |         |
| <b>Temperature</b>                      | 298(2) K                                                          |         |
| <b>Wavelength</b>                       | 1.54178 Å                                                         |         |
| <b>Crystal system, space group</b>      | Tetragonal, I 41 c d                                              |         |
| <b>Unit cell dimensions</b>             | a = 32.9888(3) Å                                                  | α = 90° |
|                                         | b = 32.9888(3) Å                                                  | β = 90° |
|                                         | c = 10.8474(2) Å                                                  | γ = 90° |
| <b>Volume</b>                           | 11804.8(3) Å <sup>3</sup>                                         |         |
| <b>Z</b>                                | 16                                                                |         |
| <b>Absorption coefficient</b>           | 2.781 mm <sup>-1</sup>                                            |         |
| <b>F(000)</b>                           | 4576                                                              |         |
| <b>Theta range for data collection</b>  | 2.68 to 65.00°                                                    |         |
| <b>Index ranges</b>                     | -38 ≤ h ≤ 38, -38 ≤ k ≤ 38, -12 ≤ l ≤ 12                          |         |
| <b>Absorption correction</b>            | Multi-Scan                                                        |         |
| <b>Data / restraints / parameters</b>   | 4885 / 2 / 329                                                    |         |
| <b>Goodness-of-fit on F<sup>2</sup></b> | 0.973                                                             |         |
| <b>Final R indices [I &gt; 2σ(I)]</b>   | R1 = 0.0467, wR2 = 0.1101                                         |         |
| <b>R indices (all data)</b>             | R1 = 0.0720, wR2 = 0.1264                                         |         |
| <b>Largest diff. peak and hole</b>      | 0.156 and -0.434 eÅ <sup>-3</sup>                                 |         |
